# Supplementary material
Source: PubMed Central journal article supplement (PMC4661224)
Supplement: 109_2015_1322_MOESM1_ESM.pdf [file 109_2015_1322_MOESM1_ESM.pdf]

**Electronic supplementary material (ESM)**

**J Mol Med 2015**

**Growth hormone replacement therapy regulates microRNA-29a and targets involved in insulin resistance**

Artur Galimov<sup>1,7</sup>, Angelika Hartung<sup>1</sup>, Roman Trepp<sup>2</sup>, Alexander Mader<sup>3</sup>, Martin Flück<sup>4,8</sup>, Axel Linke<sup>5</sup>,  
Matthias Blüher<sup>6</sup>, Emanuel Christ<sup>2</sup>, and Jan Krützfeldt<sup>1,7,8</sup>

<sup>1</sup>Division of Endocrinology, Diabetes, and Clinical Nutrition, University of Zurich and University Hospital Zurich, Switzerland, <sup>2</sup>Division of Endocrinology, Diabetes and Clinical Nutrition, University Hospital Bern, Inselspital, Switzerland, <sup>3</sup>Division of Trauma Surgery, University Hospital Zurich, Switzerland, <sup>4</sup>Department of Orthopedics, University Hospital Balgrist, Zurich, Switzerland, <sup>5</sup>Heart Center Leipzig, University of Leipzig, Germany, <sup>6</sup>Department of Medicine, University of Leipzig, Germany, <sup>7</sup>Competence Center Personalized Medicine, ETH Zurich and University of Zurich, Switzerland, <sup>8</sup>Zurich Center for Integrative Human Physiology, University of Zurich, Switzerland

**Correspondence:**

Jan Krützfeldt, MD, University Hospital Zurich, Division of Endocrinology, Diabetes, and Clinical Nutrition, Rämistrasse 100, 8091 Zurich, Switzerland. Phone: +41 (0)44 255 36 27, Fax: +41 (0)44 255 9741, E-mail: [jan.kruezfeldt@usz.ch](mailto:jan.kruezfeldt@usz.ch)

**Supplementary Figure 1. Changes in miRNA-29a expression do not influence the differentiation state or insulin sensitivity of human myotubes.**

Human myotubes were transfected with miR-29a mimics, miR-29a antagomirs or the respective scrambled control oligonucleotides. After 48 h cells were stimulated with or without 100 nM insulin (Ins) for 15 min before harvesting. AKT phosphorylation at serine 473 (pAKT), total AKT, adult myosin heavy chain (MHC) and GAPDH amounts were determined by western blotting. Proliferating undifferentiated myoblasts (Undiff.) were used to demonstrate specificity of MHC staining for the differentiated state. Shown are densitometry results for MHC normalized for GAPDH and for pAKT normalized for total AKT in arbitrary units (AU), n=4-6. Changes were analyzed using one-way ANOVA and Tukey's post test comparing all samples. \*\*\*, p<0.001

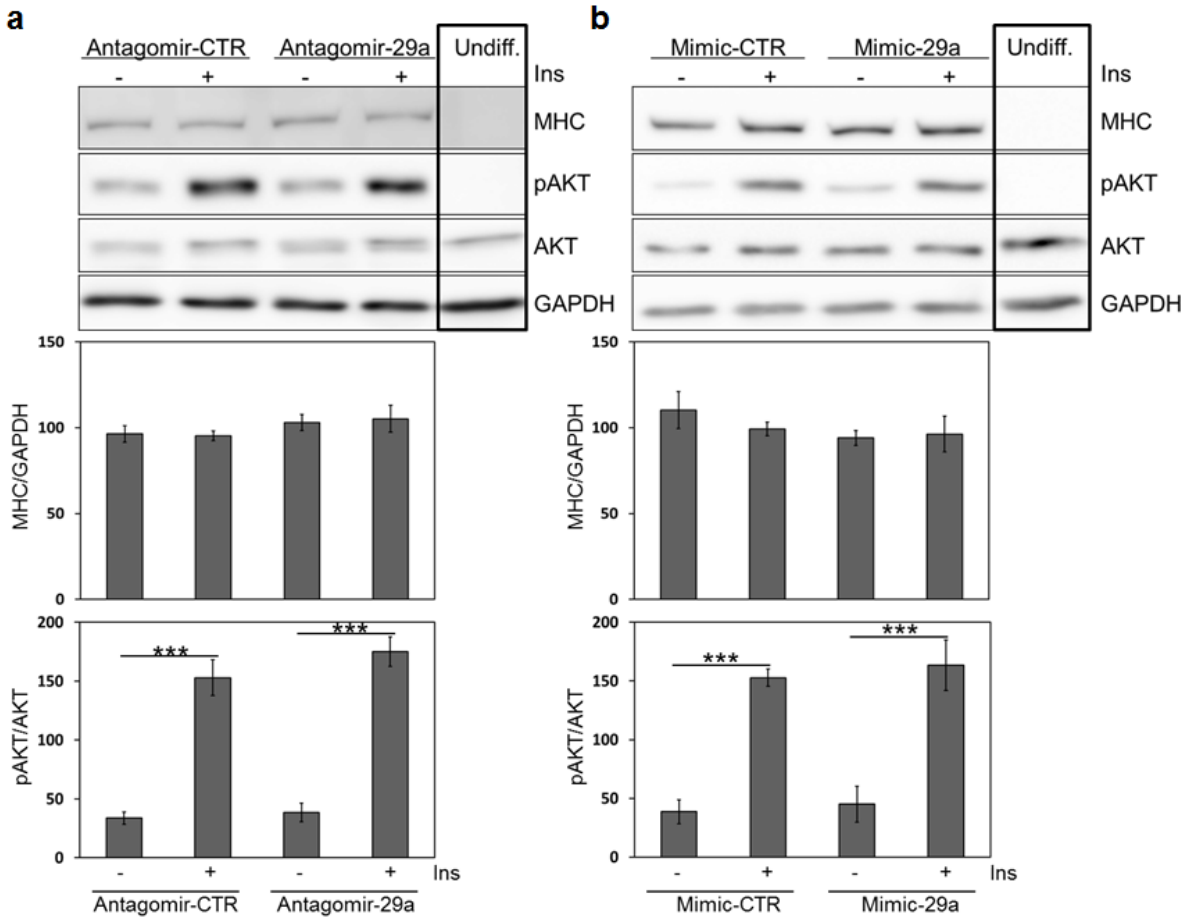

**Supplementary Figure 2. MiR-29a levels in skeletal muscle do not correlate with insulin sensitivity in patients with prediabetes.** OGTTs were performed in 33 subjects with prediabetes and the metabolic clearance rate (MCR) or the insulin sensitivity index (ISI) calculated as described in Methods. miR-29a levels were measured in muscle biopsies (M.vastus lateralis) and normalized to miR-let-7 and shown as arbitrary units (AU). miRNA levels were plotted against MCR or ISI, respectively.

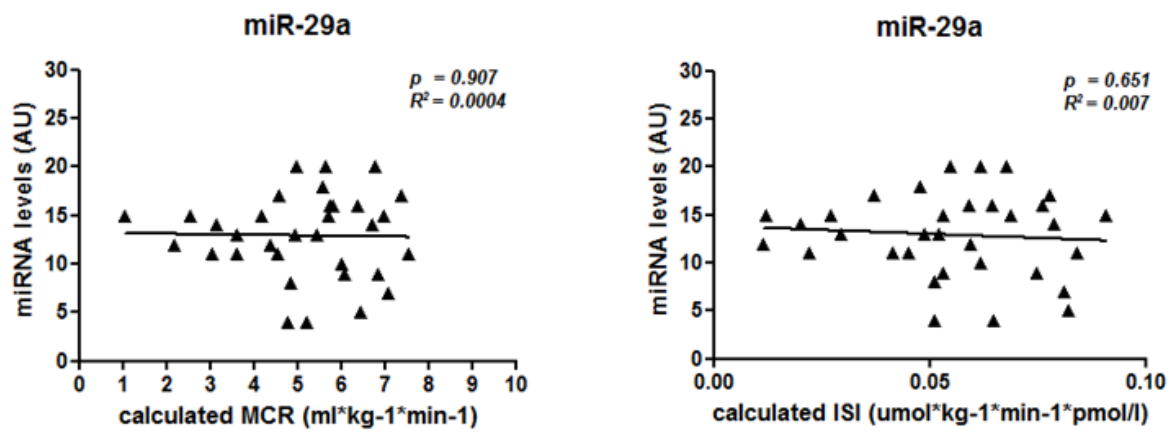

**Supplementary Figure 3. Unchanged miR-29a levels and miR-29a target gene expression in skeletal muscle after HFD in mice.** (A) C57Bl6 mice were subjected to HFD diet over 20 weeks and glucose values measured in the fasted or non-fasted state. miR-29a levels in tibialis anterior muscle were normalized to miR-let-7 and shown as arbitrary units (AU). (B) qRT-PCR analysis of miR-29a target genes in skeletal muscle after HFD (grey) or normal chow (white). Results for mice after HFD and normal chow (control) are each n=7 (male mice). mRNA was normalized to 18S RNA. Results for HFD versus control were analyzed using student's t test. \*: p<0.05, \*\*\*: p<0.001.

**a**

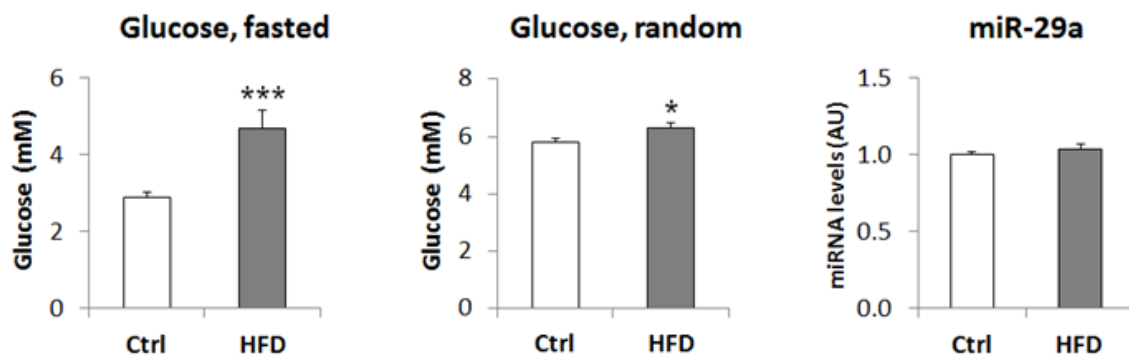

**b**

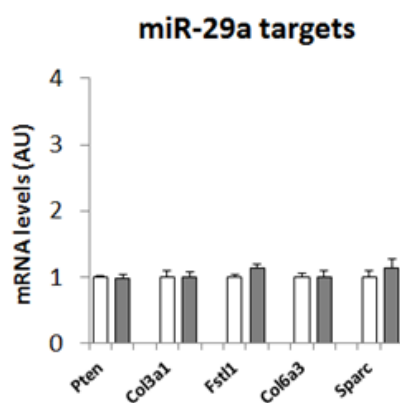

**Supplementary Figure 4. Plasma levels of FSTL1 and SPARC in GHD patients before and after 4 months of GHRT.** 10 GHD patients as described in Fig.4 were subjected to GHRT for 4 months. Plasma FSTL1 and SPARC levels were measured in fasted blood samples using ELISA. Values are shown for the whole cohort (all, n=10) or separately analyzed for individuals with improved IS (HOMA-IR decreased), n=5, or worsened IS (HOMA-IR increased), n=5, after GHRT. Baseline values are shown in white, values after GHRT shown in grey. \*,  $p < 0.05$  (paired student's t test).

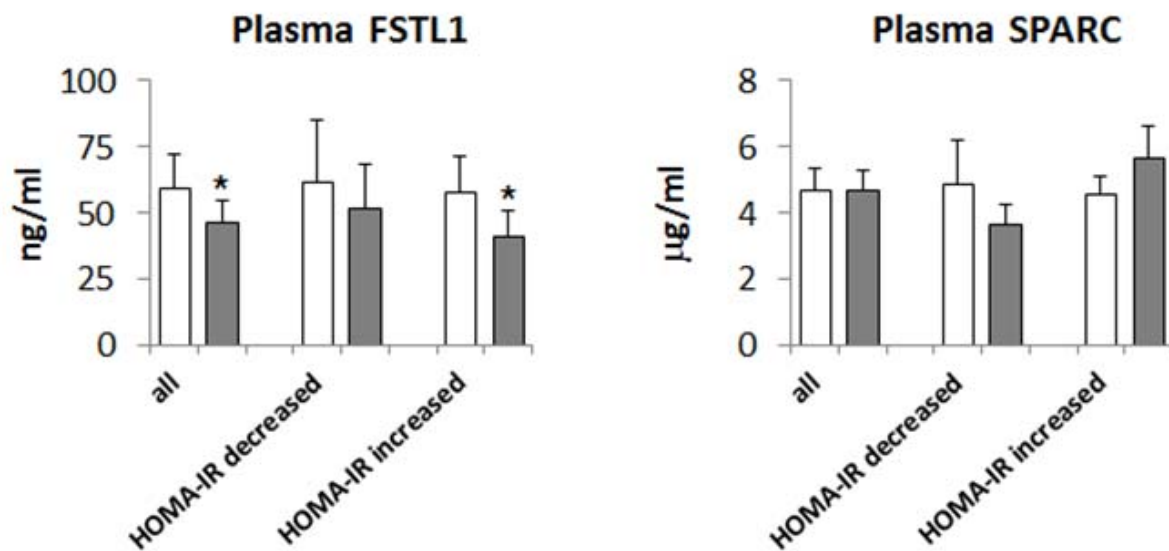

**Supplementary Table 1. RNA transcript regulation in skeletal muscle from GHD mice after GHRT.** GHD mice were treated with PBS or GH over 3 weeks. Total RNA was isolated from the tibialis anterior muscle and analyzed using RNA deep sequencing (n=3, male mice). Shown are all genes that were considered significantly regulated based on a q value < 0.05 as provided by the manufacturer.

gene\_exp\_diff\_significant

| test_id     | nearest_ref_id                               | gene          | locus      | FPKM   |            | log2(fold_p_value) | q_value   | significant   |
|-------------|----------------------------------------------|---------------|------------|--------|------------|--------------------|-----------|---------------|
|             |                                              |               |            | GHPBS  | GHT        |                    |           |               |
| XLOC_000147 | -                                            | -             | chr1:61221 | 0.00   | 220'322.00 | inf                | 5.00E-005 | 8.65E-004 yes |
| XLOC_002208 | -                                            | -             | chr10:9852 | 0.00   | 68'519.20  | inf                | 5.00E-005 | 8.65E-004 yes |
| XLOC_017689 | -                                            | -             | chr6:14504 | 0.00   | 34'961.50  | inf                | 5.00E-005 | 8.65E-004 yes |
| XLOC_018570 | -                                            | -             | chr7:13336 | 0.00   | 150'436.00 | inf                | 5.00E-005 | 8.65E-004 yes |
| XLOC_011537 | -                                            | -             | chr2:17258 | 0.00   | 13'451.90  | inf                | 1.45E-003 | 1.43E-002 yes |
| XLOC_011581 | NR_029528                                    | Mirla-1       | chr2:18012 | 0.00   | 146.94     | inf                | 1.45E-003 | 1.43E-002 yes |
| XLOC_003168 | NR_027819;NR_027820;NR_1810032008Rik,Snordia | -             | chr11:1165 | 4.10   | 79.24      | 4.27               | 1.35E-003 | 1.36E-002 yes |
| XLOC_002953 | NM_007742                                    | Coll1a        | chr11:9475 | 43.54  | 560.22     | 3.69               | 5.00E-005 | 8.65E-004 yes |
| XLOC_016519 | NM_007743                                    | Coll1a2       | chr6:44556 | 116.65 | 1'324.84   | 3.51               | 5.00E-005 | 8.65E-004 yes |
| XLOC_011289 | NM_001126338;NM_023043                       | Prnd          | chr2:13177 | 1.62   | 16.78      | 3.37               | 5.00E-005 | 8.65E-004 yes |
| XLOC_019851 | -                                            | -             | chr7:10808 | 2.72   | 23.81      | 3.13               | 5.60E-003 | 4.09E-002 yes |
| XLOC_000099 | NM_009930                                    | Col3a1        | chr1:45366 | 24.12  | 190.65     | 2.98               | 5.00E-005 | 8.65E-004 yes |
| XLOC_015928 | NM_153107                                    | Cpz           | chr5:35844 | 0.48   | 3.66       | 2.94               | 5.00E-003 | 3.74E-002 yes |
| XLOC_002056 | NM_001077638;NM_133182;Prmt2                 | -             | chr10:7566 | 4.11   | 30.74      | 2.90               | 5.75E-003 | 4.16E-002 yes |
| XLOC_013057 | NM_007729                                    | Coll1a1       | chr3:11373 | 0.40   | 2.89       | 2.86               | 5.00E-005 | 8.65E-004 yes |
| XLOC_007152 | NM_001204152;NM_0012041                      | C1qtnf6       | chr15:7835 | 1.87   | 13.36      | 2.84               | 5.00E-005 | 8.65E-004 yes |
| XLOC_015132 | -                                            | -             | chr4:57383 | 764.19 | 5'281.18   | 2.79               | 1.25E-003 | 1.28E-002 yes |
| XLOC_012178 | NM_009608                                    | Actc1         | chr2:11387 | 238.90 | 1'450.41   | 2.60               | 5.00E-005 | 8.65E-004 yes |
| XLOC_016586 | NM_008590                                    | Mest          | chr6:30688 | 1.05   | 6.27       | 2.58               | 1.50E-004 | 2.26E-003 yes |
| XLOC_001280 | -                                            | -             | chr1:82288 | 7.10   | 42.24      | 2.57               | 5.00E-005 | 8.65E-004 yes |
| XLOC_000094 | NM_024283                                    | 1500015010Rik | chr1:43787 | 2.20   | 12.78      | 2.54               | 5.00E-005 | 8.65E-004 yes |
| XLOC_021643 | NM_028638                                    | Gad1l         | chr9:11581 | 1.75   | 9.42       | 2.43               | 5.00E-005 | 8.65E-004 yes |
| XLOC_003425 | NM_009242                                    | Sparc         | chr11:5520 | 184.85 | 915.32     | 2.31               | 5.00E-005 | 8.65E-004 yes |
| XLOC_020665 | NM_026818                                    | Cilp2         | chr8:72404 | 1.49   | 7.24       | 2.28               | 5.00E-005 | 8.65E-004 yes |
| XLOC_004326 | NM_001205343;NM_130887                       | Papln         | chr12:8510 | 1.10   | 5.21       | 2.25               | 5.00E-005 | 8.65E-004 yes |
| XLOC_019146 | NM_009131                                    | Clec11a       | chr7:51555 | 2.69   | 12.55      | 2.22               | 5.00E-005 | 8.65E-004 yes |
| XLOC_000738 | NM_007737                                    | Col5a2        | chr1:45431 | 8.69   | 39.75      | 2.19               | 5.00E-005 | 8.65E-004 yes |
| XLOC_009262 | -                                            | -             | chr17:3511 | 0.99   | 4.42       | 2.16               | 2.60E-003 | 2.24E-002 yes |
| XLOC_000733 | NM_001013799                                 | A530098C11Rik | chr1:44066 | 12.10  | 51.78      | 2.10               | 5.00E-005 | 8.65E-004 yes |
| XLOC_017212 | NM_001136065;NM_010433                       | Hipk2         | chr6:38647 | 7.36   | 31.49      | 2.10               | 5.00E-005 | 8.65E-004 yes |
| XLOC_010755 | NM_015734                                    | Col5a1        | chr2:27741 | 12.13  | 51.63      | 2.09               | 5.00E-005 | 8.65E-004 yes |
| XLOC_021789 | NM_001102404;NM_0011024                      | Acp5          | chr9:21931 | 1.25   | 5.07       | 2.02               | 1.50E-004 | 2.26E-003 yes |
| XLOC_014295 | NM_001161799;NM_008546                       | Mfap2         | chr4:14056 | 4.85   | 18.99      | 1.97               | 5.00E-005 | 8.65E-004 yes |
| XLOC_006047 | NM_033325                                    | Loxl2         | chr14:7000 | 10.30  | 40.24      | 1.97               | 5.00E-005 | 8.65E-004 yes |
| XLOC_004884 | -                                            | -             | chr12:1024 | 28.99  | 112.88     | 1.96               | 5.00E-005 | 8.65E-004 yes |
| XLOC_002060 | NM_146007                                    | Col6a2        | chr10:7605 | 23.94  | 89.58      | 1.90               | 5.00E-005 | 8.65E-004 yes |
| XLOC_017395 | NM_001003955;NM_177466;Rab11fip5             | -             | chr6:85284 | 7.34   | 26.99      | 1.88               | 5.00E-005 | 8.65E-004 yes |
| XLOC_022095 | NM_007730                                    | Coll2a1       | chr9:79446 | 2.75   | 10.10      | 1.87               | 5.00E-005 | 8.65E-004 yes |
| XLOC_002653 | NM_029568                                    | Mfap4         | chr11:6125 | 10.26  | 37.15      | 1.86               | 5.00E-005 | 8.65E-004 yes |
| XLOC_000890 | NM_001243008;NM_0012430                      | Col6a3        | chr1:92663 | 37.65  | 135.31     | 1.85               | 5.00E-005 | 8.65E-004 yes |
| XLOC_003878 | NM_008815                                    | Etv4          | chr11:1016 | 1.43   | 5.14       | 1.84               | 5.00E-005 | 8.65E-004 yes |
| XLOC_014198 | NM_028266                                    | Coll6a1       | chr4:12972 | 2.91   | 10.42      | 1.84               | 5.00E-005 | 8.65E-004 yes |
| XLOC_001187 | NR_037996                                    | Hmga2-ps1     | chr1:17874 | 2.36   | 8.41       | 1.83               | 1.50E-003 | 1.47E-002 yes |
| XLOC_014635 | NM_011607                                    | Tnc           | chr4:63620 | 2.82   | 10.00      | 1.82               | 5.00E-005 | 8.65E-004 yes |
| XLOC_007391 | -                                            | -             | chr15:4937 | 2.58   | 9.13       | 1.82               | 5.00E-003 | 3.74E-002 yes |
| XLOC_011287 | NM_001177833;NM_0011778                      | Smox          | chr2:13131 | 254.88 | 893.51     | 1.81               | 5.00E-005 | 8.65E-004 yes |
| XLOC_021758 | NM_016919                                    | Col5a3        | chr9:20574 | 10.01  | 34.59      | 1.79               | 5.00E-005 | 8.65E-004 yes |
| XLOC_000842 | NM_001001565;NM_0010015                      | Chpf          | chr1:75471 | 3.32   | 11.14      | 1.75               | 5.00E-005 | 8.65E-004 yes |
| XLOC_012454 | NM_013592                                    | Matn4         | chr2:16421 | 0.97   | 3.21       | 1.73               | 1.10E-003 | 1.16E-002 yes |
| XLOC_010460 | NM_019698;NM_153554                          | Aldh18a1      | chr19:4062 | 2.16   | 7.12       | 1.72               | 5.00E-005 | 8.65E-004 yes |
| XLOC_019208 | NM_001136084;NM_009414                       | Tph1          | chr7:53902 | 1.18   | 3.86       | 1.71               | 5.00E-005 | 8.65E-004 yes |
| XLOC_019809 | NM_007631                                    | Cend1         | chr7:15211 | 2.39   | 7.62       | 1.68               | 5.00E-005 | 8.65E-004 yes |
| XLOC_016442 | -                                            | -             | chr5:22230 | 12.77  | 40.67      | 1.67               | 5.00E-005 | 8.65E-004 yes |
| XLOC_013219 | NM_007753                                    | Cpa3          | chr3:20115 | 1.41   | 4.42       | 1.65               | 5.00E-005 | 8.65E-004 yes |
| XLOC_012952 | NM_007802                                    | Ctsk          | chr3:95303 | 7.68   | 24.02      | 1.64               | 5.00E-005 | 8.65E-004 yes |
| XLOC_013892 | NM_009928                                    | Coll15a1      | chr4:47220 | 35.87  | 111.30     | 1.63               | 5.00E-005 | 8.65E-004 yes |
| XLOC_022737 | NM_022322                                    | Tnmd          | chrX:13038 | 13.35  | 41.37      | 1.63               | 5.00E-005 | 8.65E-004 yes |
| XLOC_017722 | -                                            | -             | chr6:37820 | 4.11   | 12.61      | 1.62               | 5.70E-003 | 4.14E-002 yes |
| XLOC_010685 | NM_027715                                    | Otud1         | chr2:19579 | 2.45   | 7.51       | 1.61               | 5.00E-005 | 8.65E-004 yes |
| XLOC_006336 | NM_080728                                    | Myh7          | chr14:5558 | 2.07   | 6.26       | 1.59               | 5.00E-005 | 8.65E-004 yes |
| XLOC_022447 | NM_021715                                    | Chst7         | chrX:19636 | 2.70   | 8.07       | 1.58               | 5.00E-005 | 8.65E-004 yes |
| XLOC_015100 | NM_011985                                    | Mmp23         | chr4:15502 | 2.39   | 7.11       | 1.58               | 1.85E-003 | 1.73E-002 yes |
| XLOC_012244 | NM_007993                                    | Fbn1          | chr2:12512 | 16.34  | 48.22      | 1.56               | 5.00E-005 | 8.65E-004 yes |
| XLOC_017421 | NM_001039394;NM_133717                       | Rab43         | chr6:87738 | 3.48   | 10.16      | 1.54               | 5.00E-005 | 8.65E-004 yes |
| XLOC_000504 | NM_177068                                    | Olfml2b       | chr1:17257 | 10.60  | 30.52      | 1.53               | 5.00E-005 | 8.65E-004 yes |
| XLOC_008416 | NM_009926                                    | Coll1a2       | chr17:3417 | 12.11  | 34.71      | 1.52               | 5.00E-005 | 8.65E-004 yes |
| XLOC_017780 | NM_173008                                    | A430110N23Rik | chr7:48774 | 12.88  | 36.40      | 1.50               | 5.00E-005 | 8.65E-004 yes |
| XLOC_006744 | NM_028195                                    | Cyth4         | chr15:7842 | 3.14   | 8.83       | 1.49               | 5.00E-005 | 8.65E-004 yes |
| XLOC_020490 | NM_009931                                    | Col4a1        | chr8:11198 | 96.66  | 270.61     | 1.49               | 5.00E-005 | 8.65E-004 yes |
| XLOC_006354 | NM_001164107;NM_0011641                      | Ripk3         | chr14:5640 | 1.47   | 4.12       | 1.48               | 1.45E-003 | 1.43E-002 yes |
| XLOC_015492 | NM_001204201;NM_0012042                      | Spp1          | chr5:10486 | 4.01   | 11.20      | 1.48               | 5.00E-005 | 8.65E-004 yes |
| XLOC_002061 | NM_009933                                    | Col6a1        | chr10:7617 | 70.39  | 196.68     | 1.48               | 5.00E-005 | 8.65E-004 yes |
| XLOC_016945 | NM_001033382                                 | Cacna2d4      | chr6:11918 | 1.06   | 2.90       | 1.45               | 5.00E-005 | 8.65E-004 yes |
| XLOC_000386 | NM_031189                                    | Myog          | chr1:13618 | 1.66   | 4.53       | 1.45               | 9.00E-004 | 9.88E-003 yes |
| XLOC_015610 | NM_010861                                    | Myl2          | chr5:12255 | 3.59   | 9.68       | 1.43               | 5.00E-004 | 6.18E-003 yes |
| XLOC_004350 | NM_010234                                    | Fos           | chr12:8681 | 1.60   | 4.25       | 1.41               | 5.00E-005 | 8.65E-004 yes |
| XLOC_002104 | NM_010255                                    | Gamt          | chr10:7972 | 13.20  | 34.86      | 1.40               | 5.00E-005 | 8.65E-004 yes |
| XLOC_000591 | NM_022019                                    | Dusp10        | chr1:18585 | 12.55  | 33.07      | 1.40               | 5.00E-005 | 8.65E-004 yes |
| XLOC_009694 | NM_001034859                                 | Gm4841        | chr18:6042 | 1.77   | 4.66       | 1.40               | 5.00E-005 | 8.65E-004 yes |
| XLOC_010992 | NM_011784                                    | Aplnr         | chr2:84976 | 14.87  | 39.06      | 1.39               | 5.00E-005 | 8.65E-004 yes |
| XLOC_018728 | NM_145379                                    | Mrgprf        | chr7:15248 | 1.63   | 4.25       | 1.38               | 1.00E-004 | 1.63E-003 yes |
| XLOC_019704 | NM_018867                                    | Cpxm2         | chr7:13923 | 7.73   | 19.97      | 1.37               | 5.00E-005 | 8.65E-004 yes |
| XLOC_018020 | NM_133210                                    | Sertad3       | chr7:28258 | 2.28   | 5.87       | 1.36               | 5.00E-005 | 8.65E-004 yes |
| XLOC_005407 | NM_009238                                    | Sox4          | chr13:2904 | 2.48   | 6.38       | 1.36               | 5.00E-005 | 8.65E-004 yes |
| XLOC_017701 | NM_008970                                    | Pthlh         | chr6:14720 | 0.83   | 2.09       | 1.34               | 2.00E-004 | 2.93E-003 yes |
| XLOC_007252 | NM_011161                                    | Mapk11        | chr15:8897 | 2.44   | 6.12       | 1.33               | 1.50E-004 | 2.26E-003 yes |
| XLOC_007613 | NM_008047                                    | Fstl1         | chr16:3777 | 30.68  | 76.50      | 1.32               | 5.00E-005 | 8.65E-004 yes |
| XLOC_004155 | NM_011519                                    | Sdcl          | chr12:8778 | 1.44   | 3.56       | 1.31               | 5.00E-005 | 8.65E-004 yes |
| XLOC_004856 | -                                            | -             | chr12:1599 | 1.73   | 4.25       | 1.30               | 1.75E-003 | 1.65E-002 yes |
| XLOC_006129 | NM_145467                                    | Itgbl1        | chr14:1240 | 7.08   | 17.42      | 1.30               | 5.00E-005 | 8.65E-004 yes |
| XLOC_005792 | NM_008695                                    | Nid2          | chr14:2057 | 7.14   | 17.51      | 1.29               | 5.00E-005 | 8.65E-004 yes |
| XLOC_017693 | NM_024469                                    | Bhlhe41       | chr6:14580 | 25.26  | 61.86      | 1.29               | 5.00E-005 | 8.65E-004 yes |
| XLOC_006809 | NM_146061                                    | Prr5          | chr15:8451 | 2.78   | 6.81       | 1.29               | 5.00E-005 | 8.65E-004 yes |
| XLOC_009611 | NM_001109988;NM_0011099                      | D0H4S114      | chr18:3359 | 21.18  | 51.60      | 1.28               | 5.00E-005 | 8.65E-004 yes |
| XLOC_003100 | NM_008626                                    | Mrc2          | chr11:1051 | 4.88   | 11.89      | 1.28               | 5.00E-005 | 8.65E-004 yes |
| XLOC_004173 | NM_013614                                    | Odc1          | chr12:1755 | 44.78  | 108.74     | 1.28               | 5.00E-005 | 8.65E-004 yes |
| XLOC_020053 | NM_026840                                    | Pdgfr1        | chr8:42011 | 4.59   | 11.08      | 1.27               | 5.00E-005 | 8.65E-004 yes |

gene\_exp\_diff\_significant

|             |                           |               |            |        |         |      |           |           |     |
|-------------|---------------------------|---------------|------------|--------|---------|------|-----------|-----------|-----|
| XLOC_012750 | NM_001198765;NM_001198765 | Postn         | chr3:54165 | 10.21  | 24.62   | 1.27 | 5.00E-005 | 8.65E-004 | yes |
| XLOC_022575 | NM_008253                 | Hmgb3         | chrX:68805 | 3.91   | 9.41    | 1.26 | 5.00E-005 | 8.65E-004 | yes |
| XLOC_004521 | NM_178911                 | Pld4          | chr12:1139 | 2.83   | 6.76    | 1.26 | 5.00E-005 | 8.65E-004 | yes |
| XLOC_001958 | NM_009665                 | Amdl1         | chr10:4000 | 127.88 | 305.35  | 1.26 | 5.00E-005 | 8.65E-004 | yes |
| XLOC_012795 | NM_133786                 | Smc4          | chr3:68805 | 3.77   | 8.95    | 1.25 | 5.00E-005 | 8.65E-004 | yes |
| XLOC_007662 | NM_001014399;NM_001014400 | Abi3bp        | chr16:5647 | 6.35   | 15.08   | 1.25 | 5.00E-005 | 8.65E-004 | yes |
| XLOC_001705 | NM_008438                 | Kera          | chr10:9706 | 6.42   | 15.23   | 1.25 | 5.00E-005 | 8.65E-004 | yes |
| XLOC_012093 | NM_011957                 | Creb3l1       | chr2:91822 | 9.24   | 21.91   | 1.25 | 5.00E-005 | 8.65E-004 | yes |
| XLOC_022312 | -                         | -             | chr9:14467 | 13.07  | 30.86   | 1.24 | 1.50E-004 | 2.26E-003 | yes |
| XLOC_012282 | NM_019696                 | Cpxm1         | chr2:13021 | 2.55   | 6.00    | 1.23 | 5.00E-005 | 8.65E-004 | yes |
| XLOC_007496 | NM_153790                 | Scarf2        | chr16:1775 | 4.08   | 9.54    | 1.23 | 5.00E-005 | 8.65E-004 | yes |
| XLOC_011080 | NM_011355                 | Sfpil1        | chr2:90936 | 2.09   | 4.89    | 1.22 | 2.90E-003 | 2.42E-002 | yes |
| XLOC_008952 | NM_001142706;NM_008198    | Cfb           | chr17:3495 | 3.69   | 8.60    | 1.22 | 5.00E-005 | 8.65E-004 | yes |
| XLOC_003038 | NM_001163481;NM_010221    | Fkbp10        | chr11:1002 | 6.55   | 15.20   | 1.21 | 5.00E-005 | 8.65E-004 | yes |
| XLOC_019785 | NR_001592                 | H19           | chr7:14976 | 554.64 | 1283.05 | 1.21 | 5.00E-005 | 8.65E-004 | yes |
| XLOC_012953 | NM_021281                 | Ctss          | chr3:95330 | 4.93   | 11.37   | 1.21 | 5.00E-005 | 8.65E-004 | yes |
| XLOC_017527 | NM_026028                 | Ccdc77        | chr6:12027 | 2.88   | 6.65    | 1.21 | 5.00E-005 | 8.65E-004 | yes |
| XLOC_012486 | NM_008968                 | Ptgis         | chr2:16702 | 1.01   | 2.32    | 1.20 | 5.00E-005 | 8.65E-004 | yes |
| XLOC_013422 | NM_001081182              | Atp8b2        | chr3:89743 | 4.41   | 10.09   | 1.19 | 5.00E-005 | 8.65E-004 | yes |
| XLOC_012655 | NM_010634                 | Fabp5         | chr3:10012 | 8.96   | 20.37   | 1.18 | 5.00E-005 | 8.65E-004 | yes |
| XLOC_020977 | -                         | -             | chr8:72534 | 4.47   | 10.13   | 1.18 | 1.10E-003 | 1.16E-002 | yes |
| XLOC_006667 | NM_181277                 | Coll4a1       | chr15:5513 | 1.78   | 4.03    | 1.18 | 5.00E-005 | 8.65E-004 | yes |
| XLOC_004898 | -                         | -             | chr12:1146 | 63.89  | 142.85  | 1.16 | 5.00E-005 | 8.65E-004 | yes |
| XLOC_014375 | NM_178406                 | Gpr153        | chr4:15164 | 4.57   | 10.21   | 1.16 | 5.00E-005 | 8.65E-004 | yes |
| XLOC_006176 | NM_001013826              | Dupd1         | chr14:2245 | 54.26  | 121.06  | 1.16 | 5.00E-005 | 8.65E-004 | yes |
| XLOC_020299 | NM_024217                 | Cmtm3         | chr8:10686 | 3.49   | 7.75    | 1.15 | 5.00E-005 | 8.65E-004 | yes |
| XLOC_016395 | NM_001172146;NM_146165    | Aimp2         | chr5:14457 | 145.42 | 323.27  | 1.15 | 5.00E-005 | 8.65E-004 | yes |
| XLOC_008306 | NM_001163416;NM_026747    | Ptx4          | chr17:2525 | 2.71   | 5.97    | 1.14 | 3.60E-003 | 2.88E-002 | yes |
| XLOC_013542 | NM_133859                 | Olfml3        | chr3:10353 | 8.19   | 18.01   | 1.14 | 5.00E-005 | 8.65E-004 | yes |
| XLOC_019395 | NM_00111043;NM_00111111   | Serpinh1      | chr7:10645 | 69.01  | 151.46  | 1.13 | 5.00E-005 | 8.65E-004 | yes |
| XLOC_014771 | NM_146256                 | Hpd1          | chr4:11645 | 2.38   | 5.21    | 1.13 | 2.00E-003 | 1.84E-002 | yes |
| XLOC_006976 | NR_038186                 | LOC100616095  | chr15:3217 | 4.67   | 10.19   | 1.13 | 5.00E-005 | 8.65E-004 | yes |
| XLOC_012866 | NM_013691                 | Thbs3         | chr3:89019 | 5.94   | 12.97   | 1.13 | 5.00E-005 | 8.65E-004 | yes |
| XLOC_016383 | NM_001033312              | Fbxl18        | chr5:14363 | 2.87   | 6.25    | 1.12 | 5.00E-005 | 8.65E-004 | yes |
| XLOC_020324 | NM_001081241;NR_035492    | Fam65a        | chr8:10812 | 27.37  | 59.54   | 1.12 | 5.00E-005 | 8.65E-004 | yes |
| XLOC_005949 | NM_008608                 | Mmp14         | chr14:5505 | 16.05  | 34.65   | 1.11 | 5.00E-005 | 8.65E-004 | yes |
| XLOC_010521 | NM_175360                 | Obfc1         | chr19:4757 | 3.52   | 7.59    | 1.11 | 1.00E-004 | 1.63E-003 | yes |
| XLOC_019794 | NM_001161624;NM_009876    | Cdkn1c        | chr7:15064 | 39.34  | 84.74   | 1.11 | 5.00E-005 | 8.65E-004 | yes |
| XLOC_022995 | NM_013912                 | Apln          | chrX:45376 | 5.94   | 12.78   | 1.11 | 5.00E-005 | 8.65E-004 | yes |
| XLOC_000130 | NM_001080126;NM_009812    | Casp8         | chr1:58852 | 1.63   | 3.51    | 1.11 | 5.00E-005 | 8.65E-004 | yes |
| XLOC_019166 | NM_026555                 | Rcn3          | chr7:52338 | 13.49  | 29.01   | 1.10 | 5.00E-005 | 8.65E-004 | yes |
| XLOC_003551 | NM_007528                 | Bcl6b         | chr11:7003 | 3.97   | 8.52    | 1.10 | 5.00E-005 | 8.65E-004 | yes |
| XLOC_021726 | NM_019482                 | Panx1         | chr9:14810 | 3.97   | 8.47    | 1.09 | 5.00E-005 | 8.65E-004 | yes |
| XLOC_001138 | NM_010185                 | Fcer1g        | chr1:17315 | 3.85   | 8.20    | 1.09 | 3.40E-003 | 2.74E-002 | yes |
| XLOC_014592 | NM_022814                 | Svep1         | chr4:58055 | 2.45   | 5.19    | 1.09 | 5.00E-005 | 8.65E-004 | yes |
| XLOC_009684 | NM_010728                 | Lox           | chr18:5267 | 1.20   | 2.54    | 1.08 | 5.00E-005 | 8.65E-004 | yes |
| XLOC_022102 | NM_026122;NM_175074       | Hmgn3         | chr9:83003 | 2.36   | 5.01    | 1.08 | 1.80E-003 | 1.70E-002 | yes |
| XLOC_002501 | NM_026979                 | C1qtnf2       | chr11:4328 | 2.16   | 4.55    | 1.08 | 2.20E-003 | 1.98E-002 | yes |
| XLOC_020423 | NM_007662                 | Cdh15         | chr8:12537 | 2.66   | 5.61    | 1.08 | 6.00E-004 | 7.04E-003 | yes |
| XLOC_020863 | NM_017370                 | Hp            | chr8:11205 | 3.50   | 7.36    | 1.07 | 5.00E-005 | 8.65E-004 | yes |
| XLOC_023296 | NM_001199246;NM_030700    | Maged2        | chrX:14724 | 9.87   | 20.74   | 1.07 | 5.00E-005 | 8.65E-004 | yes |
| XLOC_004196 | NM_008482                 | Lamb1         | chr12:3195 | 10.61  | 22.24   | 1.07 | 5.00E-005 | 8.65E-004 | yes |
| XLOC_006377 | NM_030004                 | Cryl1         | chr14:5785 | 4.33   | 9.07    | 1.07 | 3.50E-004 | 4.67E-003 | yes |
| XLOC_007639 | NM_026439                 | Ccdc80        | chr16:4505 | 5.72   | 11.96   | 1.06 | 5.00E-005 | 8.65E-004 | yes |
| XLOC_014784 | NM_017377                 | B4galt2       | chr4:11754 | 2.08   | 4.34    | 1.06 | 1.70E-003 | 1.63E-002 | yes |
| XLOC_014816 | NM_194060                 | Foxo6         | chr4:11993 | 9.35   | 19.51   | 1.06 | 5.00E-005 | 8.65E-004 | yes |
| XLOC_021095 | NM_010493                 | Icam1         | chr9:20820 | 4.29   | 8.93    | 1.06 | 5.00E-005 | 8.65E-004 | yes |
| XLOC_016178 | NM_146162                 | Tmem119       | chr5:11424 | 2.11   | 4.40    | 1.06 | 1.30E-003 | 1.32E-002 | yes |
| XLOC_008477 | NM_133662                 | Ier3          | chr17:3595 | 3.38   | 7.03    | 1.06 | 5.00E-005 | 8.65E-004 | yes |
| XLOC_012896 | NM_011311                 | S100a4        | chr3:90407 | 10.31  | 21.44   | 1.06 | 1.00E-004 | 1.63E-003 | yes |
| XLOC_015755 | NM_007984                 | Fscn1         | chr5:14372 | 5.88   | 12.23   | 1.06 | 5.00E-005 | 8.65E-004 | yes |
| XLOC_019723 | NM_029886                 | 9430038101Rik | chr7:14456 | 2.47   | 5.13    | 1.06 | 3.50E-003 | 2.81E-002 | yes |
| XLOC_013496 | NM_023320                 | Plekhol1      | chr3:95792 | 18.56  | 38.51   | 1.05 | 5.00E-005 | 8.65E-004 | yes |
| XLOC_000962 | NM_008567                 | Mcm6          | chr1:13022 | 3.07   | 6.37    | 1.05 | 5.00E-005 | 8.65E-004 | yes |
| XLOC_009663 | NM_001136086;NM_009468    | Dpys13        | chr18:4348 | 6.81   | 14.01   | 1.04 | 5.00E-005 | 8.65E-004 | yes |
| XLOC_020637 | NM_021788                 | Sap30         | chr8:59961 | 3.06   | 6.23    | 1.03 | 1.15E-003 | 1.20E-002 | yes |
| XLOC_004380 | NM_029553;NM_198311       | Ttc8          | chr12:1001 | 1.16   | 2.37    | 1.03 | 5.00E-005 | 8.65E-004 | yes |
| XLOC_016337 | NM_008788                 | Pcolce        | chr5:13804 | 75.55  | 153.71  | 1.02 | 5.00E-005 | 8.65E-004 | yes |
| XLOC_014206 | NM_010686                 | Laptm5        | chr4:13046 | 7.27   | 14.79   | 1.02 | 5.00E-005 | 8.65E-004 | yes |
| XLOC_012432 | NM_177263                 | Zhx3          | chr2:16055 | 6.70   | 13.62   | 1.02 | 1.95E-003 | 1.80E-002 | yes |
| XLOC_004191 | NM_181395                 | Pxdn          | chr12:3062 | 12.94  | 26.28   | 1.02 | 5.00E-005 | 8.65E-004 | yes |
| XLOC_022738 | NM_001083895;NM_026838    | Srpx2         | chrX:13044 | 4.63   | 9.40    | 1.02 | 5.00E-005 | 8.65E-004 | yes |
| XLOC_016148 | NM_001164735;NM_016715    | Crlf2         | chr5:10996 | 3.66   | 7.43    | 1.02 | 2.35E-003 | 2.08E-002 | yes |
| XLOC_003615 | NM_011340                 | Serpinf1      | chr11:7522 | 107.77 | 217.50  | 1.01 | 5.00E-005 | 8.65E-004 | yes |
| XLOC_000359 | NM_145509                 | 5430435G22Rik | chr1:13356 | 2.40   | 4.84    | 1.01 | 1.50E-004 | 2.26E-003 | yes |
| XLOC_019920 | NM_009932                 | Col4a2        | chr8:11312 | 84.60  | 170.54  | 1.01 | 5.00E-005 | 8.65E-004 | yes |
| XLOC_020258 | NM_008610                 | Mmp2          | chr8:95351 | 23.93  | 48.10   | 1.01 | 5.00E-005 | 8.65E-004 | yes |
| XLOC_016966 | NM_015776                 | Mfap5         | chr6:12246 | 16.29  | 32.71   | 1.01 | 5.00E-005 | 8.65E-004 | yes |
| XLOC_023181 | NM_013563                 | Il2rg         | chrX:98455 | 4.13   | 8.26    | 1.00 | 3.00E-004 | 4.11E-003 | yes |
| XLOC_021248 | NM_009382                 | Thy1          | chr9:43851 | 16.91  | 33.80   | 1.00 | 5.00E-005 | 8.65E-004 | yes |
| XLOC_021691 | NM_011606                 | Clec3b        | chr9:12306 | 40.27  | 80.28   | 1.00 | 5.00E-005 | 8.65E-004 | yes |
| XLOC_020129 | NM_016685                 | Comp          | chr8:72897 | 14.21  | 28.23   | 0.99 | 5.00E-005 | 8.65E-004 | yes |
| XLOC_008570 | NM_001081635;NM_001081636 | Ccnd3         | chr17:4764 | 12.44  | 24.71   | 0.99 | 5.00E-005 | 8.65E-004 | yes |
| XLOC_011445 | NM_008489                 | Lbp           | chr2:15813 | 9.18   | 18.18   | 0.99 | 5.00E-005 | 8.65E-004 | yes |
| XLOC_004929 | NM_010197                 | Nid1          | chr13:1352 | 26.84  | 53.15   | 0.99 | 5.00E-005 | 8.65E-004 | yes |
| XLOC_002509 | NM_009616                 | Adam19        | chr11:4586 | 5.97   | 11.79   | 0.98 | 5.00E-005 | 8.65E-004 | yes |
| XLOC_019648 | NM_009898                 | Corola        | chr7:13384 | 5.65   | 11.15   | 0.98 | 2.00E-004 | 2.23E-003 | yes |
| XLOC_015443 | NM_019932                 | Pf4           | chr5:91201 | 8.58   | 16.93   | 0.98 | 4.00E-004 | 5.90E-003 | yes |
| XLOC_020180 | NM_010442                 | Hmox1         | chr8:77617 | 11.41  | 22.51   | 0.98 | 1.00E-004 | 1.63E-003 | yes |
| XLOC_008057 | NM_009621                 | Adamts1       | chr16:8575 | 11.94  | 23.53   | 0.98 | 5.00E-005 | 8.65E-004 | yes |
| XLOC_017062 | NM_010128                 | Empl1         | chr6:13531 | 16.50  | 32.40   | 0.97 | 5.00E-005 | 8.65E-004 | yes |
| XLOC_015013 | NM_010329                 | Pdpm          | chr4:14285 | 1.83   | 3.59    | 0.97 | 3.00E-004 | 4.11E-003 | yes |
| XLOC_006199 | NM_011103                 | Prkcd         | chr14:3140 | 4.20   | 8.21    | 0.97 | 5.00E-005 | 8.65E-004 | yes |
| XLOC_006665 | NM_010930                 | Nov           | chr15:5457 | 5.30   | 10.34   | 0.96 | 5.00E-005 | 8.65E-004 | yes |
| XLOC_008717 | NM_001081416              | Fndc1         | chr17:7931 | 25.79  | 50.24   | 0.96 | 5.00E-005 | 8.65E-004 | yes |
| XLOC_000814 | NM_010518                 | Igf2bp5       | chr1:72904 | 113.22 | 220.02  | 0.96 | 5.00E-005 | 8.65E-004 | yes |
| XLOC_001946 | NM_008538                 | Marcks        | chr10:3685 | 9.87   | 19.13   | 0.95 | 5.00E-005 | 8.65E-004 | yes |
| XLOC_002462 | NR_002890                 | Gml2070       | chr11:2666 | 11.35  | 21.94   | 0.95 | 5.00E-005 | 8.65E-004 | yes |
| XLOC_022761 | NM_011712                 | Wbp5          | chrX:13277 | 10.11  | 19.47   | 0.95 | 5.00E-005 | 8.65E-004 | yes |



gene\_exp\_diff\_significant

|             |                         |                    |            |          |          |      |           |           |     |
|-------------|-------------------------|--------------------|------------|----------|----------|------|-----------|-----------|-----|
| XLOC_009685 | NM_008908               | Ppic               | chr18:5356 | 13.97    | 26.89    | 0.95 | 5.00E-005 | 8.65E-004 | yes |
| XLOC_004072 | NM_139147               | Rab40b             | chr11:1212 | 3.22     | 6.19     | 0.94 | 5.00E-005 | 8.65E-004 | yes |
| XLOC_018368 | NM_011671               | Ucp2               | chr7:10764 | 18.79    | 36.13    | 0.94 | 5.00E-005 | 8.65E-004 | yes |
| XLOC_006454 | NM_009755;NR_033241     | Bmp1               | chr14:7087 | 29.75    | 57.12    | 0.94 | 5.00E-005 | 8.65E-004 | yes |
| XLOC_006068 | NM_008879               | Lcp1               | chr14:7553 | 5.90     | 11.32    | 0.94 | 5.00E-005 | 8.65E-004 | yes |
| XLOC_017563 | NM_013534               | Leprel2            | chr6:12475 | 4.33     | 8.29     | 0.94 | 5.00E-005 | 8.65E-004 | yes |
| XLOC_017218 | NM_172477               | Dennd2a            | chr6:39412 | 1.67     | 3.19     | 0.94 | 5.00E-005 | 8.65E-004 | yes |
| XLOC_000808 | NM_010233               | Fnl1               | chr1:71632 | 29.57    | 56.63    | 0.94 | 5.00E-005 | 8.65E-004 | yes |
| XLOC_002158 | NM_175451               | Ckap4              | chr10:839f | 2.53     | 4.85     | 0.94 | 5.00E-005 | 8.65E-004 | yes |
| XLOC_003394 | NM_145974               | N4bp3              | chr11:5145 | 5.77     | 11.04    | 0.93 | 5.00E-005 | 8.65E-004 | yes |
| XLOC_004013 | NM_026280               | Mxra7              | chr11:116f | 8.40     | 16.04    | 0.93 | 5.00E-005 | 8.65E-004 | yes |
| XLOC_022595 | NM_007542               | Bgn                | chrX:7072f | 75.23    | 143.53   | 0.93 | 5.00E-005 | 8.65E-004 | yes |
| XLOC_012809 | NM_133187               | Fam198b            | chr3:7968f | 4.02     | 7.65     | 0.93 | 5.00E-005 | 8.65E-004 | yes |
| XLOC_001215 | NM_008250               | Hlx                | chr1:1865f | 6.01     | 11.43    | 0.93 | 2.00E-004 | 2.93E-003 | yes |
| XLOC_015365 | NM_026667               | Fam114a1           | chr5:6536f | 8.50     | 16.15    | 0.93 | 5.00E-005 | 8.65E-004 | yes |
| XLOC_014502 | NM_027147               | Enho               | chr4:4151f | 23.60    | 44.74    | 0.92 | 5.00E-005 | 8.65E-004 | yes |
| XLOC_007722 | NM_001110498;NM_010509  | Ifnar2             | chr16:9137 | 4.74     | 8.98     | 0.92 | 5.00E-005 | 8.65E-004 | yes |
| XLOC_014235 | NM_001039677            | Slc30a2            | chr4:1338f | 4.93     | 9.34     | 0.92 | 5.00E-005 | 8.65E-004 | yes |
| XLOC_007558 | NM_008235               | Hes1               | chr16:300f | 10.73    | 20.31    | 0.92 | 5.00E-005 | 8.65E-004 | yes |
| XLOC_002665 | NR_028550               | Snord49a           | chr11:6241 | 3'686.02 | 6'972.81 | 0.92 | 5.65E-003 | 4.12E-002 | yes |
| XLOC_016870 | NM_028766               | Tmem43             | chr6:9142f | 17.60    | 33.28    | 0.92 | 5.00E-005 | 8.65E-004 | yes |
| XLOC_004358 | NM_177354               | Vash1              | chr12:8801 | 3.91     | 7.38     | 0.92 | 5.00E-005 | 8.65E-004 | yes |
| XLOC_005498 | NM_001177371;NM_001177f | Dbn1               | chr13:5557 | 3.45     | 6.51     | 0.92 | 5.00E-005 | 8.65E-004 | yes |
| XLOC_014266 | NM_008305               | Hspg2              | chr4:1370f | 209.32   | 394.93   | 0.92 | 5.00E-005 | 8.65E-004 | yes |
| XLOC_016374 | NM_175274               | Ttyh3              | chr5:1410f | 6.50     | 12.26    | 0.92 | 5.00E-005 | 8.65E-004 | yes |
| XLOC_001738 | NM_009344               | Phlda1             | chr10:110f | 4.08     | 7.70     | 0.92 | 1.00E-004 | 1.63E-003 | yes |
| XLOC_005379 | NM_001177653;NM_015787f | Hist1hle,Hist1h2be | chr13:236f | 7.89     | 14.87    | 0.91 | 5.00E-005 | 8.65E-004 | yes |
| XLOC_001392 | NM_176837               | Arhgap18           | chr10:264f | 2.35     | 4.43     | 0.91 | 5.00E-005 | 8.65E-004 | yes |
| XLOC_009860 | NM_054042               | Cg248              | chr19:506f | 16.06    | 30.24    | 0.91 | 5.00E-005 | 8.65E-004 | yes |
| XLOC_019058 | NM_146186               | Wdr62              | chr7:3102f | 1.67     | 3.14     | 0.91 | 5.00E-005 | 8.65E-004 | yes |
| XLOC_000736 | NM_207281               | 4832428D23Rik      | chr1:4426f | 3.33     | 6.25     | 0.91 | 5.00E-005 | 8.65E-004 | yes |
| XLOC_008560 | NM_025611               | Cul7               | chr17:467f | 5.99     | 11.24    | 0.91 | 5.00E-005 | 8.65E-004 | yes |
| XLOC_003475 | NR_027800               | Gm16516            | chr11:607f | 5.49     | 10.30    | 0.91 | 1.00E-004 | 1.63E-003 | yes |
| XLOC_001475 | NM_052994               | Spock2             | chr10:595f | 3.81     | 7.14     | 0.91 | 5.00E-005 | 8.65E-004 | yes |
| XLOC_007321 | NM_011653               | Tubala             | chr15:987f | 14.48    | 27.11    | 0.90 | 5.00E-005 | 8.65E-004 | yes |
| XLOC_014124 | NM_001042411;NM_019782f | Leprel1            | chr4:1189f | 5.35     | 10.01    | 0.90 | 5.00E-005 | 8.65E-004 | yes |
| XLOC_003580 | NM_177776               | Smtnl2             | chr11:722f | 83.95    | 156.61   | 0.90 | 5.00E-005 | 8.65E-004 | yes |
| XLOC_009554 | NM_001110850;NM_001110f | Crem               | chr18:326f | 3.67     | 6.83     | 0.90 | 5.00E-005 | 8.65E-004 | yes |
| XLOC_000859 | NM_001003948            | Pidl1              | chr1:8403f | 4.67     | 8.67     | 0.89 | 1.50E-004 | 2.26E-003 | yes |
| XLOC_020395 | NM_027950               | Osgin1             | chr8:1219f | 7.24     | 13.42    | 0.89 | 5.00E-005 | 8.65E-004 | yes |
| XLOC_002063 | NM_001109991;NM_009929f | Col18a1            | chr10:765f | 6.86     | 12.72    | 0.89 | 5.00E-005 | 8.65E-004 | yes |
| XLOC_003187 | NM_001204129;NM_001204f | C1gtnf1            | chr11:1182 | 6.00     | 11.05    | 0.88 | 5.00E-005 | 8.65E-004 | yes |
| XLOC_020593 | NM_001081150            | Lonr1f             | chr8:3727f | 7.14     | 13.16    | 0.88 | 5.00E-005 | 8.65E-004 | yes |
| XLOC_017011 | NM_010204               | Fgf6               | chr6:1269f | 2.96     | 5.45     | 0.88 | 6.65E-003 | 4.61E-002 | yes |
| XLOC_014169 | NM_172145               | Fam176b            | chr4:1258f | 5.78     | 10.62    | 0.88 | 1.05E-003 | 1.12E-002 | yes |
| XLOC_001711 | NM_026268               | Dusp6              | chr10:987f | 4.08     | 7.49     | 0.88 | 5.00E-005 | 8.65E-004 | yes |
| XLOC_010666 | NM_011701               | Vim                | chr2:1349f | 187.63   | 343.54   | 0.87 | 5.00E-005 | 8.65E-004 | yes |
| XLOC_019088 | NM_001111073;NM_008761f | Fxyd5              | chr7:3181f | 11.11    | 20.32    | 0.87 | 1.00E-004 | 1.63E-003 | yes |
| XLOC_011854 | NM_007986               | Fap                | chr2:6233f | 3.60     | 6.59     | 0.87 | 5.00E-005 | 8.65E-004 | yes |
| XLOC_006361 | NM_010779               | Mcpt4              | chr14:566f | 7.18     | 13.12    | 0.87 | 5.00E-004 | 6.18E-003 | yes |
| XLOC_002950 | NM_007689               | Chad               | chr11:944f | 30.54    | 55.64    | 0.87 | 5.00E-005 | 8.65E-004 | yes |
| XLOC_014185 | NM_029219               | Rnf19b             | chr4:1287f | 14.35    | 26.08    | 0.86 | 5.00E-005 | 8.65E-004 | yes |
| XLOC_019867 | -                       | -                  | chr7:1333f | 6.51     | 11.83    | 0.86 | 5.00E-004 | 6.18E-003 | yes |
| XLOC_016027 | NM_001159518;NM_008048f | Igfbp7             | chr5:7773f | 96.99    | 175.85   | 0.86 | 5.00E-005 | 8.65E-004 | yes |
| XLOC_003607 | NM_001015046            | Rap1gap2           | chr17:741f | 6.47     | 11.72    | 0.86 | 5.00E-005 | 8.65E-004 | yes |
| XLOC_004059 | NM_007621               | Cbr2               | chr11:120f | 14.85    | 26.90    | 0.86 | 5.00E-005 | 8.65E-004 | yes |
| XLOC_013532 | NM_011197               | Ptgfrn             | chr3:1008f | 2.68     | 4.84     | 0.85 | 5.00E-005 | 8.65E-004 | yes |
| XLOC_004900 | -                       | -                  | chr12:114f | 34.23    | 61.63    | 0.85 | 5.00E-005 | 8.65E-004 | yes |
| XLOC_010231 | NM_133803               | Dpp3               | chr19:490f | 29.85    | 53.72    | 0.85 | 5.00E-005 | 8.65E-004 | yes |
| XLOC_007145 | NM_025931               | Ift27              | chr15:779f | 10.28    | 18.46    | 0.84 | 5.00E-005 | 8.65E-004 | yes |
| XLOC_002655 | NM_027817               | Grap               | chr11:614f | 5.42     | 9.74     | 0.84 | 5.00E-005 | 8.65E-004 | yes |
| XLOC_012547 | NR_040745               | B230312C02Rik      | chr2:1801f | 25.29    | 45.41    | 0.84 | 5.00E-005 | 8.65E-004 | yes |
| XLOC_015773 | NM_001081362            | Trrap              | chr5:1455f | 7.55     | 13.53    | 0.84 | 5.00E-005 | 8.65E-004 | yes |
| XLOC_017586 | NM_009829               | Cend2              | chr6:1270f | 3.11     | 5.57     | 0.84 | 5.00E-005 | 8.65E-004 | yes |
| XLOC_010263 | NM_001164057;NM_008893f | Pola2              | chr19:594f | 8.19     | 14.62    | 0.84 | 5.00E-005 | 8.65E-004 | yes |
| XLOC_011528 | NM_001013369;NM_001110f | Pfdn4              | chr2:1703f | 3.50     | 6.22     | 0.83 | 1.65E-003 | 1.59E-002 | yes |
| XLOC_018659 | NM_027201               | Zfp511             | chr7:1472f | 5.21     | 9.26     | 0.83 | 8.00E-004 | 8.94E-003 | yes |
| XLOC_011881 | NM_025942;NM_030091f    | Olal               | chr2:7293f | 24.38    | 43.33    | 0.83 | 5.00E-005 | 8.65E-004 | yes |
| XLOC_011905 | NM_001113399;NM_001113f | Zfp385b            | chr2:7724f | 2.24     | 3.97     | 0.83 | 5.00E-005 | 8.65E-004 | yes |
| XLOC_005415 | NM_001166030            | Mylk4              | chr13:327f | 416.89   | 737.38   | 0.82 | 5.00E-005 | 8.65E-004 | yes |
| XLOC_014885 | NM_025455               | Ccdc28b            | chr4:1292f | 16.33    | 28.87    | 0.82 | 5.00E-005 | 8.65E-004 | yes |
| XLOC_001921 | NM_008481               | Lama2              | chr10:267f | 10.10    | 17.85    | 0.82 | 5.00E-005 | 8.65E-004 | yes |
| XLOC_018506 | NM_009627               | Adm                | chr7:1177f | 4.81     | 8.48     | 0.82 | 6.00E-004 | 7.04E-003 | yes |
| XLOC_000999 | NM_001081307;NR_015606f | Ppp1r12b           | chr1:1366f | 43.23    | 76.27    | 0.82 | 5.00E-005 | 8.65E-004 | yes |
| XLOC_009096 | NM_181397               | Rftnl              | chr17:501f | 7.41     | 13.07    | 0.82 | 5.00E-005 | 8.65E-004 | yes |
| XLOC_022005 | NM_010729               | Loxl1              | chr9:5813f | 14.45    | 25.40    | 0.81 | 5.00E-005 | 8.65E-004 | yes |
| XLOC_008855 | NM_013642               | Dusp1              | chr17:266f | 26.57    | 46.64    | 0.81 | 5.00E-005 | 8.65E-004 | yes |
| XLOC_009476 | NM_001037859            | Csflr              | chr18:612f | 6.78     | 11.89    | 0.81 | 5.00E-005 | 8.65E-004 | yes |
| XLOC_002132 | NM_027120               | Itgblbp3           | chr10:806f | 133.39   | 233.75   | 0.81 | 5.00E-005 | 8.65E-004 | yes |
| XLOC_016913 | NM_133930               | Crelld1            | chr6:1134f | 22.50    | 39.39    | 0.81 | 5.00E-005 | 8.65E-004 | yes |
| XLOC_010251 | NM_001164480;NM_001164f | Sipal              | chr19:565f | 18.13    | 31.72    | 0.81 | 5.00E-005 | 8.65E-004 | yes |
| XLOC_015875 | NM_001170555;NM_001170f | Prkag2             | chr5:2436f | 2.57     | 4.49     | 0.81 | 5.00E-005 | 8.65E-004 | yes |
| XLOC_011165 | NM_033524               | Spred1             | chr2:1169f | 3.06     | 5.35     | 0.81 | 5.00E-005 | 8.65E-004 | yes |
| XLOC_020952 | NM_001081337            | Sipal12            | chr8:1279f | 6.62     | 11.56    | 0.80 | 9.50E-004 | 1.03E-002 | yes |
| XLOC_017362 | NM_001039392;NM_001190f | Tmsb10             | chr6:7290f | 108.20   | 188.85   | 0.80 | 5.00E-005 | 8.65E-004 | yes |
| XLOC_004578 | NM_010496               | Ig2                | chr12:257f | 1.65     | 2.88     | 0.80 | 5.50E-004 | 6.64E-003 | yes |
| XLOC_006728 | NM_027122               | Mfsd3              | chr15:765f | 10.25    | 17.86    | 0.80 | 5.00E-005 | 8.65E-004 | yes |
| XLOC_005979 | NM_001168346;NM_023699f | Nfatc4             | chr14:564f | 3.81     | 6.64     | 0.80 | 1.45E-003 | 1.43E-002 | yes |
| XLOC_007575 | NM_011638               | Tfrc               | chr16:326f | 106.97   | 185.83   | 0.80 | 5.00E-005 | 8.65E-004 | yes |
| XLOC_010606 | NM_028804               | Ccdc3              | chr2:5058f | 9.64     | 16.70    | 0.79 | 5.00E-005 | 8.65E-004 | yes |
| XLOC_009154 | NM_133685               | Rab31              | chr17:660f | 2.78     | 4.81     | 0.79 | 5.00E-005 | 8.65E-004 | yes |
| XLOC_000068 | NM_030266;NM_172971f    | Inpp4a             | chr1:3735f | 3.00     | 5.19     | 0.79 | 5.00E-005 | 8.65E-004 | yes |
| XLOC_010616 | NM_172471               | Itih5              | chr2:1007f | 9.72     | 16.81    | 0.79 | 5.00E-005 | 8.65E-004 | yes |
| XLOC_008740 | NM_011581               | Thbs2              | chr17:148f | 2.74     | 4.74     | 0.79 | 5.00E-005 | 8.65E-004 | yes |
| XLOC_011642 | NM_001012396;NM_013935f | Ptpla              | chr2:1394f | 41.23    | 71.24    | 0.79 | 5.00E-005 | 8.65E-004 | yes |
| XLOC_014065 | NM_026470               | Spata6             | chr4:1113f | 2.13     | 3.68     | 0.79 | 1.50E-004 | 2.26E-003 | yes |
| XLOC_005535 | NM_001145799;NM_007796f | Ctla2a             | chr13:610f | 7.21     | 12.43    | 0.79 | 3.00E-004 | 4.11E-003 | yes |
| XLOC_006749 | NM_008495               | Lgals1             | chr15:787f | 223.51   | 385.27   | 0.79 | 5.00E-005 | 8.65E-004 | yes |
| XLOC_006291 | NM_001033271            | Tmem55b            | chr14:515f | 6.10     | 10.51    | 0.78 | 2.85E-003 | 2.39E-002 | yes |

gene\_exp\_diff\_significant

|             |                         |               |            |        |        |      |           |           |     |
|-------------|-------------------------|---------------|------------|--------|--------|------|-----------|-----------|-----|
| XLOC_020908 | NM_028071               | Cott1         | chr8:12233 | 2.35   | 4.04   | 0.78 | 3.85E-003 | 3.05E-002 | yes |
| XLOC_000625 | NM_00111059;NM_133654   | Cd34          | chr1:19676 | 35.31  | 60.66  | 0.78 | 5.00E-005 | 8.65E-004 | yes |
| XLOC_014112 | NM_001039175;NM_0010391 | Elovl1        | chr4:11810 | 11.76  | 20.18  | 0.78 | 1.50E-004 | 2.26E-003 | yes |
| XLOC_005351 | NM_175656               | Hist1h4i      | chr13:2213 | 9.36   | 16.05  | 0.78 | 2.75E-003 | 2.32E-002 | yes |
| XLOC_014728 | NM_172874               | Podn          | chr4:10766 | 15.96  | 27.32  | 0.78 | 5.00E-005 | 8.65E-004 | yes |
| XLOC_003875 | NM_026865               | 1700113I22Rik | chr11:1012 | 12.91  | 22.09  | 0.78 | 5.00E-005 | 8.65E-004 | yes |
| XLOC_001704 | NM_008524               | Lum           | chr10:9702 | 30.34  | 51.88  | 0.77 | 5.00E-005 | 8.65E-004 | yes |
| XLOC_002125 | NM_010722               | Lmnb2         | chr10:8036 | 4.52   | 7.72   | 0.77 | 1.15E-003 | 1.20E-002 | yes |
| XLOC_013339 | NM_175193               | Golim4        | chr3:75680 | 8.22   | 14.04  | 0.77 | 5.00E-005 | 8.65E-004 | yes |
| XLOC_020642 | NM_001081390            | Palld         | chr8:63993 | 47.86  | 81.74  | 0.77 | 5.00E-005 | 8.65E-004 | yes |
| XLOC_013582 | NM_028779               | Ampd2         | chr3:10787 | 3.47   | 5.92   | 0.77 | 1.50E-004 | 2.26E-003 | yes |
| XLOC_013530 | NM_001013026            | Ttf2          | chr3:10074 | 3.84   | 6.55   | 0.77 | 2.00E-004 | 2.93E-003 | yes |
| XLOC_009165 | NM_001164074;NM_0011640 | Tgif1         | chr17:7115 | 2.03   | 3.46   | 0.77 | 2.65E-003 | 2.27E-002 | yes |
| XLOC_008290 | NM_013630               | Pkd1          | chr17:2466 | 15.16  | 25.82  | 0.77 | 4.45E-003 | 3.40E-002 | yes |
| XLOC_017370 | NM_025882               | Pole4         | chr6:82596 | 11.19  | 19.03  | 0.77 | 5.00E-005 | 8.65E-004 | yes |
| XLOC_018003 | NM_011577               | Tgfb1         | chr7:26472 | 10.13  | 17.22  | 0.77 | 5.00E-005 | 8.65E-004 | yes |
| XLOC_007695 | NM_139134               | Chodl         | chr16:7893 | 4.06   | 6.90   | 0.77 | 5.00E-005 | 8.65E-004 | yes |
| XLOC_009110 | NM_145934               | Stap2         | chr17:5613 | 3.05   | 5.19   | 0.77 | 6.00E-003 | 4.27E-002 | yes |
| XLOC_008426 | NM_010382               | H2-Eb1        | chr17:3444 | 6.90   | 11.72  | 0.76 | 5.00E-005 | 8.65E-004 | yes |
| XLOC_010709 | NM_001039386;NM_0010393 | Nelf          | chr2:24905 | 8.29   | 14.07  | 0.76 | 5.00E-005 | 8.65E-004 | yes |
| XLOC_016359 | NM_008808               | Pdgfra        | chr5:13945 | 17.88  | 30.27  | 0.76 | 6.45E-003 | 4.51E-002 | yes |
| XLOC_017978 | NM_153112               | Cadm4         | chr7:25267 | 1.35   | 2.28   | 0.76 | 2.90E-003 | 2.42E-002 | yes |
| XLOC_017298 | NM_153573               | Fkbp14        | chr6:54527 | 2.62   | 4.42   | 0.76 | 5.00E-005 | 8.65E-004 | yes |
| XLOC_014936 | NM_024215               | Zfp593        | chr4:13375 | 4.09   | 6.91   | 0.76 | 2.40E-003 | 2.10E-002 | yes |
| XLOC_001414 | NM_001168304;NM_198164  | Cdk19         | chr10:4006 | 10.23  | 17.23  | 0.75 | 5.00E-005 | 8.65E-004 | yes |
| XLOC_004901 | -                       | -             | chr12:1146 | 70.57  | 118.82 | 0.75 | 1.00E-004 | 1.63E-003 | yes |
| XLOC_012842 | NM_016701               | Nes           | chr3:87775 | 12.82  | 21.58  | 0.75 | 5.00E-005 | 8.65E-004 | yes |
| XLOC_011100 | NM_001025246            | Trp53i11      | chr2:93027 | 19.20  | 32.31  | 0.75 | 5.00E-005 | 8.65E-004 | yes |
| XLOC_006582 | NM_001008702;NM_0010373 | Dab2          | chr15:6245 | 6.36   | 10.70  | 0.75 | 5.00E-005 | 8.65E-004 | yes |
| XLOC_002248 | NM_013590               | Lyz1          | chr10:1167 | 7.86   | 13.21  | 0.75 | 1.45E-003 | 1.43E-002 | yes |
| XLOC_016199 | NM_019682               | Dynl11        | chr5:11574 | 5.75   | 9.68   | 0.75 | 5.00E-005 | 8.65E-004 | yes |
| XLOC_000382 | NM_021355               | Fmod          | chr1:13593 | 217.93 | 365.98 | 0.75 | 5.00E-005 | 8.65E-004 | yes |
| XLOC_017757 | NM_001093764;NM_0010937 | Myadm         | chr7:32890 | 25.25  | 42.40  | 0.75 | 5.00E-005 | 8.65E-004 | yes |
| XLOC_017384 | NM_024239               | Stampb        | chr6:83493 | 5.94   | 9.96   | 0.75 | 4.00E-004 | 5.20E-003 | yes |
| XLOC_013587 | NM_008596               | Syp12         | chr3:10801 | 183.05 | 306.67 | 0.74 | 5.00E-005 | 8.65E-004 | yes |
| XLOC_008977 | NM_011655               | Tubb5         | chr17:3597 | 27.73  | 46.40  | 0.74 | 5.00E-005 | 8.65E-004 | yes |
| XLOC_001046 | NM_010683               | Lamc1         | chr1:15506 | 19.64  | 32.81  | 0.74 | 5.00E-005 | 8.65E-004 | yes |
| XLOC_002247 | NM_017372               | Lyz2          | chr10:1167 | 29.87  | 49.90  | 0.74 | 5.00E-005 | 8.65E-004 | yes |
| XLOC_004422 | NM_178613               | 4933433P14Rik | chr12:1065 | 9.67   | 16.14  | 0.74 | 5.00E-005 | 8.65E-004 | yes |
| XLOC_020438 | NM_018855               | Gas8          | chr8:12604 | 4.62   | 7.71   | 0.74 | 6.00E-003 | 4.27E-002 | yes |
| XLOC_019685 | NM_178600               | Vkorc1        | chr7:13503 | 12.93  | 21.58  | 0.74 | 2.50E-004 | 3.51E-003 | yes |
| XLOC_001458 | NM_010288               | Gjal          | chr10:5605 | 3.07   | 5.13   | 0.74 | 5.00E-005 | 8.65E-004 | yes |
| XLOC_005704 | NM_027127               | Gpx8          | chr13:1138 | 4.00   | 6.67   | 0.74 | 6.50E-004 | 7.15E-003 | yes |
| XLOC_014237 | NM_019641               | Stmn1         | chr4:13402 | 7.55   | 12.58  | 0.74 | 5.15E-003 | 3.83E-002 | yes |
| XLOC_023259 | NM_177919               | Tcaa15        | chrX:13273 | 6.91   | 11.51  | 0.74 | 3.20E-003 | 2.61E-002 | yes |
| XLOC_012927 | NM_009112               | S100a10       | chr3:93355 | 51.48  | 85.58  | 0.73 | 5.00E-005 | 8.65E-004 | yes |
| XLOC_022237 | NM_177771               | Klhl18        | chr9:11032 | 6.00   | 9.98   | 0.73 | 5.00E-005 | 8.65E-004 | yes |
| XLOC_016294 | NM_001039162;NM_009990  | Klip2         | chr5:13496 | 8.66   | 14.37  | 0.73 | 5.00E-005 | 8.65E-004 | yes |
| XLOC_003126 | NM_011943               | Map2k6        | chr11:1102 | 11.24  | 18.64  | 0.73 | 5.00E-005 | 8.65E-004 | yes |
| XLOC_003984 | NM_008258               | Hn1           | chr11:1153 | 29.84  | 49.48  | 0.73 | 5.00E-005 | 8.65E-004 | yes |
| XLOC_009733 | NM_176832;NM_194355     | Spire1        | chr18:6764 | 4.69   | 7.77   | 0.73 | 5.00E-005 | 8.65E-004 | yes |
| XLOC_004216 | NM_008584               | Meox2         | chr12:3783 | 11.92  | 19.72  | 0.73 | 5.00E-005 | 8.65E-004 | yes |
| XLOC_017570 | NM_146171               | Ncapd2        | chr6:12511 | 15.67  | 25.92  | 0.73 | 5.00E-005 | 8.65E-004 | yes |
| XLOC_011638 | NM_009105               | Rsul          | chr2:12998 | 7.08   | 11.70  | 0.72 | 5.00E-005 | 8.65E-004 | yes |
| XLOC_000533 | NM_178598               | Tagln2        | chr1:17443 | 45.97  | 75.93  | 0.72 | 5.00E-005 | 8.65E-004 | yes |
| XLOC_006207 | NM_138672               | Stabl         | chr14:3194 | 12.18  | 20.12  | 0.72 | 5.00E-005 | 8.65E-004 | yes |
| XLOC_004147 | NM_025323               | 0610009D07Rik | chr12:4824 | 11.03  | 18.20  | 0.72 | 5.00E-005 | 8.65E-004 | yes |
| XLOC_003632 | NM_001024920            | Trp53i13      | chr11:7732 | 5.06   | 8.35   | 0.72 | 7.25E-003 | 4.94E-002 | yes |
| XLOC_004902 | -                       | -             | chr12:1146 | 92.87  | 153.00 | 0.72 | 5.00E-005 | 8.65E-004 | yes |
| XLOC_004731 | NM_146244               | Rps6kl1       | chr12:8647 | 7.05   | 11.61  | 0.72 | 5.00E-005 | 8.65E-004 | yes |
| XLOC_002315 | NM_016756;NM_183417     | Cdk2          | chr10:1281 | 3.55   | 5.84   | 0.72 | 1.75E-003 | 1.66E-002 | yes |
| XLOC_006630 | NM_018755;NM_176073     | Pgcp          | chr15:3301 | 10.65  | 17.53  | 0.72 | 1.95E-003 | 1.80E-002 | yes |
| XLOC_000483 | NM_019759               | Dpt           | chr1:16672 | 18.36  | 30.22  | 0.72 | 5.00E-005 | 8.65E-004 | yes |
| XLOC_019509 | NM_009685               | Apbb1         | chr7:11270 | 10.35  | 17.04  | 0.72 | 5.00E-005 | 8.65E-004 | yes |
| XLOC_018571 | NM_145587               | Sbkl          | chr7:13341 | 25.07  | 41.24  | 0.72 | 5.00E-005 | 8.65E-004 | yes |
| XLOC_002293 | NM_008512               | Lrpl          | chr10:1265 | 51.73  | 85.02  | 0.72 | 5.00E-005 | 8.65E-004 | yes |
| XLOC_019604 | NM_001033380            | Itpr1p12      | chr7:12562 | 6.83   | 11.23  | 0.72 | 5.00E-005 | 8.65E-004 | yes |
| XLOC_014944 | NM_025382               | Tmem57        | chr4:13435 | 15.28  | 25.09  | 0.72 | 5.00E-005 | 8.65E-004 | yes |
| XLOC_012309 | NM_175113               | Trmt6         | chr2:13262 | 4.53   | 7.43   | 0.71 | 5.00E-004 | 6.18E-003 | yes |
| XLOC_003936 | NM_010655               | Kpna2         | chr11:1068 | 15.97  | 26.17  | 0.71 | 5.00E-005 | 8.65E-004 | yes |
| XLOC_000433 | NM_026369               | Arpc5         | chr1:15461 | 3.24   | 5.30   | 0.71 | 5.00E-005 | 8.65E-004 | yes |
| XLOC_009924 | NM_001013019            | Lrrn4c1       | chr19:8925 | 4.83   | 7.91   | 0.71 | 1.50E-004 | 2.26E-003 | yes |
| XLOC_012508 | NM_011497               | Aurka         | chr2:17218 | 6.34   | 10.39  | 0.71 | 1.00E-003 | 1.08E-002 | yes |
| XLOC_013079 | NM_024461               | 1810037I17Rik | chr3:12262 | 15.72  | 25.74  | 0.71 | 5.00E-005 | 8.65E-004 | yes |
| XLOC_000966 | NM_010016               | Cd55          | chr1:13233 | 11.26  | 18.44  | 0.71 | 5.00E-005 | 8.65E-004 | yes |
| XLOC_016279 | NM_007941               | Stx2          | chr5:12945 | 10.27  | 16.81  | 0.71 | 1.00E-004 | 1.63E-003 | yes |
| XLOC_004189 | NM_201357               | Tssc1         | chr12:2943 | 5.89   | 9.63   | 0.71 | 1.20E-003 | 1.24E-002 | yes |
| XLOC_007736 | NM_026700;NM_027293     | Dopey2        | chr16:9371 | 19.34  | 31.56  | 0.71 | 5.00E-005 | 8.65E-004 | yes |
| XLOC_010669 | NM_008625               | Mrcl          | chr2:14151 | 1.80   | 2.93   | 0.71 | 5.00E-005 | 8.65E-004 | yes |
| XLOC_004903 | -                       | -             | chr12:1146 | 43.42  | 70.70  | 0.70 | 1.50E-004 | 2.26E-003 | yes |
| XLOC_002182 | NM_025914               | Actr6         | chr10:8917 | 1.97   | 3.21   | 0.70 | 1.80E-003 | 1.70E-002 | yes |
| XLOC_011746 | NM_030244               | Ier51         | chr2:30326 | 4.04   | 6.57   | 0.70 | 6.65E-003 | 4.61E-002 | yes |
| XLOC_020750 | NM_010499               | Ier2          | chr8:87188 | 7.68   | 12.49  | 0.70 | 1.60E-003 | 1.55E-002 | yes |
| XLOC_021529 | NM_176979               | Topbp1        | chr9:10320 | 7.94   | 12.90  | 0.70 | 5.00E-005 | 8.65E-004 | yes |
| XLOC_009446 | NM_029394               | Snx24         | chr18:5340 | 10.11  | 16.41  | 0.70 | 5.00E-005 | 8.65E-004 | yes |
| XLOC_006994 | NM_008774               | Pabpc1        | chr15:3652 | 42.34  | 68.76  | 0.70 | 5.00E-005 | 8.65E-004 | yes |
| XLOC_008425 | NM_207105               | H2-Abl        | chr17:3440 | 26.71  | 43.36  | 0.70 | 5.00E-005 | 8.65E-004 | yes |
| XLOC_016244 | NM_001110140;NM_009722  | Atp2a2        | chr5:12290 | 12.55  | 20.36  | 0.70 | 5.00E-005 | 8.65E-004 | yes |
| XLOC_016686 | NM_001243199;NM_0012431 | Gimap4        | chr6:48634 | 3.45   | 5.59   | 0.70 | 1.85E-003 | 1.73E-002 | yes |
| XLOC_017567 | NM_026988               | Ptms          | chr6:12486 | 69.11  | 111.94 | 0.70 | 5.00E-005 | 8.65E-004 | yes |
| XLOC_018895 | NM_009046               | Relb          | chr7:20191 | 5.10   | 8.26   | 0.69 | 6.50E-004 | 7.51E-003 | yes |
| XLOC_023325 | NM_009214               | Sms           | chrX:15388 | 35.14  | 56.81  | 0.69 | 5.00E-005 | 8.65E-004 | yes |
| XLOC_012891 | NM_009113               | S100a13       | chr3:90318 | 12.58  | 20.33  | 0.69 | 6.50E-004 | 7.51E-003 | yes |
| XLOC_007312 | NM_007478               | Arf3          | chr15:9856 | 5.82   | 9.40   | 0.69 | 5.00E-005 | 8.65E-004 | yes |
| XLOC_000026 | NM_010267               | Gdap1         | chr1:17135 | 6.60   | 10.65  | 0.69 | 5.00E-005 | 8.65E-004 | yes |
| XLOC_004032 | NM_018822               | Sgsh          | chr11:1191 | 4.29   | 6.92   | 0.69 | 1.00E-004 | 1.63E-003 | yes |
| XLOC_021499 | NM_029620               | Pcolce2       | chr9:95538 | 7.07   | 11.42  | 0.69 | 2.50E-004 | 3.51E-003 | yes |
| XLOC_003474 | NM_025294               | Gml6515       | chr1:6071  | 9.67   | 15.61  | 0.69 | 5.00E-005 | 8.65E-004 | yes |
| XLOC_001787 | NM_177707               | Stac3         | chr10:1265 | 116.51 | 187.99 | 0.69 | 5.00E-005 | 8.65E-004 | yes |

gene\_exp\_diff\_significant

|             |                         |               |            |        |        |      |           |           |     |
|-------------|-------------------------|---------------|------------|--------|--------|------|-----------|-----------|-----|
| XLOC_013008 | NM_010937               | Nras          | chr3:10286 | 7.60   | 12.24  | 0.69 | 5.00E-005 | 8.65E-004 | yes |
| XLOC_000449 | NM_028333               | Angptl1       | chr1:15873 | 6.04   | 9.72   | 0.69 | 4.70E-003 | 3.57E-002 | yes |
| XLOC_015666 | NM_001130476;NM_013837  | Tps1          | chr5:13054 | 12.19  | 19.63  | 0.69 | 1.00E-004 | 1.63E-003 | yes |
| XLOC_001219 | NM_178692               | Cl30074G19Rik | chr1:18669 | 24.34  | 39.15  | 0.69 | 5.00E-005 | 8.65E-004 | yes |
| XLOC_009492 | NM_207255               | Zfp532        | chr18:6573 | 5.49   | 8.83   | 0.69 | 5.00E-005 | 8.65E-004 | yes |
| XLOC_009111 | NM_013664               | Sh3gl1        | chr17:5614 | 14.72  | 23.66  | 0.69 | 6.15E-003 | 4.35E-002 | yes |
| XLOC_004023 | NM_011594               | Timp2         | chr11:1181 | 77.00  | 123.75 | 0.68 | 5.00E-005 | 8.65E-004 | yes |
| XLOC_001129 | NM_001081304            | Atf6          | chr1:17263 | 9.05   | 14.55  | 0.68 | 5.00E-005 | 8.65E-004 | yes |
| XLOC_014959 | NM_009777               | Clqb          | chr4:13643 | 6.11   | 9.82   | 0.68 | 3.50E-004 | 4.67E-003 | yes |
| XLOC_018331 | NM_001162918;NM_025515  | Ccdc90b       | chr7:99709 | 12.35  | 19.82  | 0.68 | 5.00E-005 | 8.65E-004 | yes |
| XLOC_017433 | NM_008881               | Plxna1        | chr6:89266 | 8.90   | 14.28  | 0.68 | 5.00E-005 | 8.65E-004 | yes |
| XLOC_022166 | NM_133977               | Trf           | chr9:10311 | 16.33  | 26.18  | 0.68 | 5.00E-005 | 8.65E-004 | yes |
| XLOC_003781 | NM_001163608;NM_028199  | Plxdc1        | chr11:9778 | 7.30   | 11.70  | 0.68 | 3.00E-004 | 4.11E-003 | yes |
| XLOC_002362 | -                       | -             | chr10:1336 | 10.77  | 17.24  | 0.68 | 2.25E-003 | 2.01E-002 | yes |
| XLOC_012306 | NM_011045               | Pcna          | chr2:13207 | 17.39  | 27.83  | 0.68 | 5.00E-005 | 8.65E-004 | yes |
| XLOC_002795 | NM_010813               | Mnt           | chr11:7464 | 7.10   | 11.35  | 0.68 | 5.00E-005 | 8.65E-004 | yes |
| XLOC_013005 | NM_001243132;NM_027533  | Tspan2        | chr3:10252 | 6.33   | 10.11  | 0.68 | 5.00E-005 | 8.65E-004 | yes |
| XLOC_014300 | NM_010139               | Epha2         | chr4:14085 | 4.74   | 7.57   | 0.68 | 1.60E-003 | 1.55E-002 | yes |
| XLOC_012473 | NM_144893               | Slc35c2       | chr2:16510 | 17.25  | 27.54  | 0.67 | 5.00E-005 | 8.65E-004 | yes |
| XLOC_012106 | NM_019657               | Hsd17b12      | chr2:93872 | 6.92   | 11.03  | 0.67 | 7.50E-004 | 8.46E-003 | yes |
| XLOC_000003 | NM_133826               | Atp6v1h       | chr1:50732 | 9.36   | 14.93  | 0.67 | 5.00E-005 | 8.65E-004 | yes |
| XLOC_008050 | NM_009770               | Btg3          | chr16:7836 | 6.17   | 9.84   | 0.67 | 4.50E-003 | 3.44E-002 | yes |
| XLOC_018523 | NM_001130479;NM_016773  | Nuch2         | chr7:12364 | 7.50   | 11.95  | 0.67 | 1.05E-003 | 1.12E-002 | yes |
| XLOC_015617 | NM_019805               | Anapc7        | chr5:12287 | 20.63  | 32.89  | 0.67 | 5.00E-005 | 8.65E-004 | yes |
| XLOC_011156 | NM_001165935;NM_028844  | Aven          | chr2:11233 | 15.33  | 24.41  | 0.67 | 2.00E-004 | 2.93E-003 | yes |
| XLOC_010520 | NM_001164717;NM_008018  | Sh3pdx2a      | chr19:4733 | 7.41   | 11.79  | 0.67 | 5.00E-005 | 8.65E-004 | yes |
| XLOC_018764 | NM_001146329            | Sbk2          | chr7:49076 | 104.51 | 166.24 | 0.67 | 5.00E-005 | 8.65E-004 | yes |
| XLOC_000248 | NM_028889               | Efhdl1        | chr1:89160 | 4.63   | 7.36   | 0.67 | 2.10E-003 | 1.91E-002 | yes |
| XLOC_014960 | NM_007574               | Clqc          | chr4:13644 | 18.77  | 29.81  | 0.67 | 2.00E-004 | 2.93E-003 | yes |
| XLOC_001470 | NM_011030               | P4hal         | chr10:5878 | 8.97   | 14.25  | 0.67 | 5.00E-005 | 8.65E-004 | yes |
| XLOC_003249 | NM_001190406;NM_0011904 | Gas2l1        | chr11:4954 | 1.84   | 2.93   | 0.67 | 1.85E-003 | 1.73E-002 | yes |
| XLOC_012558 | NM_183162               | BC006779      | chr2:18096 | 4.88   | 7.74   | 0.67 | 5.00E-005 | 8.65E-004 | yes |
| XLOC_005432 | NM_001166391;NM_028784  | Fl3a1         | chr13:3695 | 4.25   | 6.74   | 0.67 | 5.00E-005 | 8.65E-004 | yes |
| XLOC_001054 | NM_010500               | Ier5          | chr1:15694 | 2.19   | 3.48   | 0.67 | 4.50E-004 | 5.73E-003 | yes |
| XLOC_018168 | NM_008422               | Kcnc3         | chr7:51846 | 5.27   | 8.36   | 0.67 | 3.00E-004 | 4.11E-003 | yes |
| XLOC_009844 | NM_011778               | Coro1b        | chr19:4148 | 17.15  | 27.19  | 0.66 | 5.00E-005 | 8.65E-004 | yes |
| XLOC_000743 | NM_028696               | Obfc2a        | chr1:51526 | 3.48   | 5.51   | 0.66 | 1.50E-004 | 2.26E-003 | yes |
| XLOC_009168 | NM_145158               | Emilin2       | chr17:7160 | 7.25   | 11.47  | 0.66 | 4.50E-004 | 5.73E-003 | yes |
| XLOC_014942 | NM_207237               | Man1c1        | chr4:13411 | 3.72   | 5.88   | 0.66 | 6.00E-004 | 7.04E-003 | yes |
| XLOC_014590 | NM_011660               | Txn1          | chr4:57956 | 13.96  | 22.04  | 0.66 | 5.00E-005 | 8.65E-004 | yes |
| XLOC_009644 | NM_007858               | Diap1         | chr18:3800 | 42.07  | 66.43  | 0.66 | 5.00E-005 | 8.65E-004 | yes |
| XLOC_001431 | NM_009846               | Cg24a         | chr10:4329 | 165.15 | 260.73 | 0.66 | 5.00E-005 | 8.65E-004 | yes |
| XLOC_006928 | NM_008272               | Hoxc9         | chr15:1028 | 2.32   | 3.66   | 0.66 | 1.15E-003 | 1.20E-002 | yes |
| XLOC_009832 | NM_001161428;NM_019449  | Unc93b1       | chr19:3935 | 7.86   | 12.39  | 0.66 | 3.50E-004 | 4.67E-003 | yes |
| XLOC_022890 | NM_019755               | Plp2          | chrX:72356 | 10.80  | 17.02  | 0.66 | 6.50E-004 | 7.51E-003 | yes |
| XLOC_023220 | NM_008409               | Itm2a         | chrX:10459 | 110.40 | 173.96 | 0.66 | 5.00E-005 | 8.65E-004 | yes |
| XLOC_016672 | NM_146175               | Zfp282        | chr6:47827 | 1.56   | 2.46   | 0.66 | 1.50E-004 | 2.26E-003 | yes |
| XLOC_021761 | NM_001199431;NM_0011994 | Dnmt1         | chr9:20711 | 13.81  | 21.74  | 0.65 | 5.00E-005 | 8.65E-004 | yes |
| XLOC_016275 | NM_133895               | Slc15a4       | chr5:12807 | 7.73   | 12.16  | 0.65 | 7.50E-004 | 8.46E-003 | yes |
| XLOC_021236 | NM_133733               | 9030425E11Rik | chr9:40494 | 2.49   | 3.93   | 0.65 | 2.65E-003 | 2.76E-002 | yes |
| XLOC_004698 | NM_001008550            | Zfyve26       | chr12:8033 | 5.79   | 9.10   | 0.65 | 5.00E-005 | 8.65E-004 | yes |
| XLOC_020165 | NM_001001491            | Tpm4          | chr8:74659 | 53.00  | 83.24  | 0.65 | 5.00E-005 | 8.65E-004 | yes |
| XLOC_007368 | NM_001033277            | Spryd3        | chr15:1019 | 6.03   | 9.47   | 0.65 | 8.50E-004 | 9.41E-003 | yes |
| XLOC_003929 | NM_010494               | Icam2         | chr11:1062 | 8.65   | 13.57  | 0.65 | 2.00E-003 | 1.84E-002 | yes |
| XLOC_015072 | NM_009498               | Vamp3         | chr4:15042 | 32.06  | 50.27  | 0.65 | 5.00E-005 | 8.65E-004 | yes |
| XLOC_021487 | NM_007801               | Ctsh          | chr9:89945 | 7.65   | 11.98  | 0.65 | 1.35E-003 | 1.36E-002 | yes |
| XLOC_015527 | NM_172717               | Chfr          | chr5:11056 | 6.76   | 10.58  | 0.65 | 5.00E-005 | 8.65E-004 | yes |
| XLOC_003652 | NM_197989               | Fam58b        | chr11:7856 | 13.22  | 20.67  | 0.64 | 5.50E-004 | 6.64E-003 | yes |
| XLOC_012327 | NM_024281;NM_133626     | Rrbp1         | chr2:14377 | 48.48  | 75.73  | 0.64 | 5.00E-005 | 8.65E-004 | yes |
| XLOC_015458 | NM_175096               | Stbd1         | chr5:93032 | 52.94  | 82.62  | 0.64 | 5.00E-005 | 8.65E-004 | yes |
| XLOC_000385 | NM_016749               | Mybph         | chr1:13609 | 86.46  | 134.88 | 0.64 | 5.00E-005 | 8.65E-004 | yes |
| XLOC_000854 | NM_010570               | Irs1          | chr1:82229 | 13.98  | 21.79  | 0.64 | 5.00E-005 | 8.65E-004 | yes |
| XLOC_000231 | NM_022417               | Itm2c         | chr1:87791 | 22.34  | 34.78  | 0.64 | 5.00E-005 | 8.65E-004 | yes |
| XLOC_016821 | NM_001170488;NM_176842  | Tprkb         | chr6:85865 | 10.56  | 16.43  | 0.64 | 5.00E-004 | 6.18E-003 | yes |
| XLOC_016271 | NM_001205082;NM_0012050 | Scarb1        | chr5:12575 | 31.15  | 48.49  | 0.64 | 5.00E-005 | 8.65E-004 | yes |
| XLOC_000747 | NM_133829;NM_178081     | Mfsd6         | chr1:52713 | 5.53   | 8.61   | 0.64 | 1.50E-004 | 2.26E-003 | yes |
| XLOC_009926 | NM_025463               | 1810009A15Rik | chr19:8963 | 16.33  | 25.41  | 0.64 | 1.15E-003 | 1.20E-002 | yes |
| XLOC_009451 | NM_026240               | Gram3         | chr18:5659 | 4.50   | 7.00   | 0.64 | 5.00E-005 | 8.65E-004 | yes |
| XLOC_019323 | NM_016721               | Iqgap1        | chr7:87856 | 12.96  | 20.16  | 0.64 | 5.00E-005 | 8.65E-004 | yes |
| XLOC_018885 | NM_009499               | Vasp          | chr7:19842 | 21.62  | 33.67  | 0.64 | 5.00E-005 | 8.65E-004 | yes |
| XLOC_019033 | NM_011885               | Mrps12        | chr7:29524 | 46.93  | 72.88  | 0.64 | 5.00E-005 | 8.65E-004 | yes |
| XLOC_001124 | NM_022563               | Ddr2          | chr1:17189 | 3.75   | 5.82   | 0.63 | 5.00E-004 | 6.18E-003 | yes |
| XLOC_016089 | NM_133738               | Antxr2        | chr5:98313 | 11.16  | 17.29  | 0.63 | 5.00E-005 | 8.65E-004 | yes |
| XLOC_017357 | NM_145569               | Mat2a         | chr6:72382 | 43.37  | 67.17  | 0.63 | 5.00E-005 | 8.65E-004 | yes |
| XLOC_015776 | NM_023142               | Arp1b         | chr5:14587 | 44.02  | 68.14  | 0.63 | 5.00E-005 | 8.65E-004 | yes |
| XLOC_003612 | NM_001098203;NM_010430  | Hic1          | chr11:7497 | 9.02   | 13.96  | 0.63 | 1.00E-004 | 1.63E-003 | yes |
| XLOC_020927 | NM_001037298            | Fam38a        | chr8:12500 | 1.55   | 2.41   | 0.63 | 5.00E-005 | 8.65E-004 | yes |
| XLOC_001337 | NM_033630               | Gm5177        | chr10:1032 | 19.93  | 30.83  | 0.63 | 5.00E-005 | 8.65E-004 | yes |
| XLOC_007064 | NM_027174               | Col22a1       | chr15:7162 | 8.09   | 12.49  | 0.63 | 5.00E-005 | 8.65E-004 | yes |
| XLOC_007830 | NM_001081633;NM_022408  | Dgcr14        | chr16:1790 | 8.74   | 13.48  | 0.63 | 6.00E-004 | 7.04E-003 | yes |
| XLOC_011211 | NM_007952               | Pdia3         | chr2:12123 | 8.22   | 12.67  | 0.62 | 5.00E-005 | 8.65E-004 | yes |
| XLOC_012893 | NM_026416               | Sl00a16       | chr3:90345 | 43.25  | 66.62  | 0.62 | 5.00E-005 | 8.65E-004 | yes |
| XLOC_014151 | NM_010213               | Fhl3          | chr4:12437 | 117.26 | 180.55 | 0.62 | 5.00E-005 | 8.65E-004 | yes |
| XLOC_017185 | NM_017478               | Copg2         | chr6:30688 | 9.42   | 14.50  | 0.62 | 1.15E-003 | 1.20E-002 | yes |
| XLOC_013080 | NM_027135               | Sec24d        | chr3:12297 | 3.59   | 5.52   | 0.62 | 2.00E-004 | 2.93E-003 | yes |
| XLOC_014927 | NM_016957               | Hmgn2         | chr4:13352 | 14.08  | 21.62  | 0.62 | 5.00E-005 | 8.65E-004 | yes |
| XLOC_001855 | NM_026793               | Myct1         | chr10:4739 | 3.70   | 5.68   | 0.62 | 5.00E-004 | 6.18E-003 | yes |
| XLOC_012134 | NM_009037               | Rcn1          | chr2:10522 | 2.81   | 4.31   | 0.62 | 2.50E-004 | 3.51E-003 | yes |
| XLOC_016984 | NM_001170395;NM_053094  | Cd163         | chr6:12425 | 3.28   | 5.02   | 0.62 | 1.35E-003 | 1.36E-002 | yes |
| XLOC_014961 | NM_007572               | Clqa          | chr4:13645 | 8.38   | 12.83  | 0.61 | 7.50E-004 | 8.46E-003 | yes |
| XLOC_021903 | NM_001110251;NM_013551  | Hmbs          | chr9:44144 | 12.99  | 19.88  | 0.61 | 1.50E-004 | 2.26E-003 | yes |
| XLOC_012872 | NM_026869               | Pygo2         | chr3:89234 | 7.63   | 11.67  | 0.61 | 7.50E-004 | 8.46E-003 | yes |
| XLOC_009634 | NM_010415               | Hbegf         | chr18:3666 | 1.64   | 2.51   | 0.61 | 4.50E-004 | 5.73E-003 | yes |
| XLOC_015596 | NM_001177594;NM_0011775 | Slc24a6       | chr5:12096 | 5.24   | 8.02   | 0.61 | 1.00E-003 | 1.08E-002 | yes |
| XLOC_016423 | NM_010229               | Flt3          | chr5:14814 | 2.26   | 3.45   | 0.61 | 5.90E-003 | 4.23E-002 | yes |
| XLOC_001577 | NM_148934               | Gml6517       | chr10:7913 | 13.56  | 20.70  | 0.61 | 5.50E-004 | 6.64E-003 | yes |
| XLOC_014781 | NM_023178               | Dmap1         | chr4:11734 | 10.29  | 15.70  | 0.61 | 2.50E-004 | 3.51E-003 | yes |
| XLOC_016928 | NM_001167763;NM_031177  | Ift122        | chr6:11580 | 11.07  | 16.89  | 0.61 | 5.00E-005 | 8.65E-004 | yes |
| XLOC_008627 | NM_008549               | Man2a1        | chr17:6495 | 3.61   | 5.50   | 0.61 | 5.00E-005 | 8.65E-004 | yes |

gene\_exp\_diff\_significant

|             |                         |               |            |           |           |      |           |           |     |
|-------------|-------------------------|---------------|------------|-----------|-----------|------|-----------|-----------|-----|
| XLOC_019645 | NM_019738               | Nupr1         | chr7:13376 | 12.56     | 19.14     | 0.61 | 7.10E-003 | 4.86E-002 | yes |
| XLOC_020357 | NM_175646               | Txn14b        | chr8:11206 | 1.69      | 2.57      | 0.61 | 5.90E-003 | 4.23E-002 | yes |
| XLOC_011280 | NM_009730               | Atrn          | chr2:13073 | 7.51      | 11.43     | 0.61 | 5.00E-005 | 8.65E-004 | yes |
| XLOC_022714 | NM_019989               | Sh3bgr1       | chrX:10629 | 10.76     | 16.37     | 0.61 | 5.00E-005 | 8.65E-004 | yes |
| XLOC_022044 | NM_153119               | Plekho2       | chr9:65402 | 15.53     | 23.64     | 0.61 | 3.00E-004 | 4.11E-003 | yes |
| XLOC_018241 | NM_010882               | Ndn           | chr7:69493 | 14.07     | 21.38     | 0.60 | 3.50E-004 | 4.67E-003 | yes |
| XLOC_009735 | NM_001127177;NM_008977  | Ptpn2         | chr18:6782 | 6.16      | 9.36      | 0.60 | 3.45E-003 | 2.78E-002 | yes |
| XLOC_017381 | NM_183138               | Tet3          | chr6:83312 | 2.06      | 3.13      | 0.60 | 5.00E-005 | 8.65E-004 | yes |
| XLOC_015807 | NM_027519               | 6330406i15Rik | chr5:15021 | 6.89      | 10.46     | 0.60 | 1.00E-004 | 1.63E-003 | yes |
| XLOC_016286 | NM_133768               | As1           | chr5:1304E | 6.38      | 9.67      | 0.60 | 6.40E-003 | 4.48E-002 | yes |
| XLOC_009871 | NM_007687               | Cfl1          | chr19:549C | 67.72     | 102.64    | 0.60 | 5.00E-005 | 8.65E-004 | yes |
| XLOC_004664 | NM_001081453;NM_008697  | Nin           | chr12:7111 | 6.39      | 9.68      | 0.60 | 6.00E-004 | 7.04E-003 | yes |
| XLOC_009454 | NM_010721               | Lmnbl         | chr18:568E | 3.90      | 5.90      | 0.60 | 2.55E-003 | 2.20E-002 | yes |
| XLOC_017413 | NM_013471               | Anxa4         | chr6:8668E | 8.38      | 12.69     | 0.60 | 1.00E-004 | 1.63E-003 | yes |
| XLOC_002111 | NM_001164147;NM_0011641 | Tcf3          | chr10:7987 | 14.72     | 22.29     | 0.60 | 1.50E-004 | 2.26E-003 | yes |
| XLOC_008939 | NM_010378               | H2-Aa         | chr17:3441 | 23.62     | 35.77     | 0.60 | 5.00E-005 | 8.65E-004 | yes |
| XLOC_010055 | NM_001201470;NM_011864  | Papss2        | chr19:3267 | 3.67      | 5.56      | 0.60 | 5.00E-005 | 8.65E-004 | yes |
| XLOC_015092 | NM_025582               | 2810405K02Rik | chr4:15427 | 109.54    | 165.78    | 0.60 | 5.00E-005 | 8.65E-004 | yes |
| XLOC_020740 | NM_172502               | Dcaf15        | chr8:8662C | 7.66      | 11.59     | 0.60 | 5.00E-003 | 3.74E-002 | yes |
| XLOC_015639 | NM_181410               | Gtf2h3        | chr5:12502 | 5.17      | 7.81      | 0.60 | 1.15E-003 | 1.20E-002 | yes |
| XLOC_022254 | NM_019922               | Crtap         | chr9:11427 | 7.16      | 10.81     | 0.59 | 4.00E-004 | 5.20E-003 | yes |
| XLOC_004132 | -                       | -             | chr11:1103 | 5.91      | 8.92      | 0.59 | 5.00E-005 | 8.65E-004 | yes |
| XLOC_013548 | NM_183224               | Fam19a3       | chr3:10457 | 2.60      | 3.92      | 0.59 | 1.75E-003 | 1.76E-002 | yes |
| XLOC_021371 | NM_176922               | Itgall        | chr9:6252E | 5.08      | 7.66      | 0.59 | 1.80E-003 | 1.60E-002 | yes |
| XLOC_012544 | NM_145851               | Cables2       | chr2:1799E | 16.51     | 24.88     | 0.59 | 5.00E-005 | 8.65E-004 | yes |
| XLOC_015761 | NM_025841               | Kdelr2        | chr5:1441E | 8.76      | 13.20     | 0.59 | 5.00E-005 | 8.65E-004 | yes |
| XLOC_019516 | NM_001162943            | Dchs1         | chr7:1129C | 5.40      | 8.14      | 0.59 | 5.00E-005 | 8.65E-004 | yes |
| XLOC_013326 | NM_008467               | Kpna4         | chr3:6887E | 32.68     | 49.22     | 0.59 | 5.00E-005 | 8.65E-004 | yes |
| XLOC_018096 | NM_008820               | Pepd          | chr7:35697 | 17.74     | 26.71     | 0.59 | 5.00E-005 | 8.65E-004 | yes |
| XLOC_004946 | NM_009054               | Trim27        | chr13:2127 | 3.60      | 5.42      | 0.59 | 1.50E-004 | 2.26E-003 | yes |
| XLOC_001980 | NM_001199272;NM_053187  | Gopc          | chr10:520E | 8.65      | 13.02     | 0.59 | 5.00E-005 | 8.65E-004 | yes |
| XLOC_006624 | NM_146057               | Dap           | chr15:311E | 11.88     | 17.87     | 0.59 | 2.20E-003 | 1.98E-002 | yes |
| XLOC_012926 | NM_016740               | Sl00a11       | chr3:93324 | 29.97     | 45.04     | 0.59 | 4.50E-004 | 5.73E-003 | yes |
| XLOC_019202 | NM_001146346;NM_010129  | Emp3          | chr7:53173 | 11.95     | 17.96     | 0.59 | 6.20E-003 | 4.38E-002 | yes |
| XLOC_001649 | NM_011561;NM_172552     | Tdg           | chr10:820E | 15.66     | 23.51     | 0.59 | 5.00E-005 | 8.65E-004 | yes |
| XLOC_009711 | NM_001164491;NM_198649  | Abli3         | chr18:619E | 25.79     | 38.72     | 0.59 | 5.00E-005 | 8.65E-004 | yes |
| XLOC_004771 | NM_183155               | BC002230      | chr12:1013 | 7.34      | 11.00     | 0.59 | 4.00E-004 | 5.20E-003 | yes |
| XLOC_007221 | NM_025445               | Arfgap3       | chr15:8313 | 2.41      | 3.61      | 0.58 | 2.60E-003 | 2.24E-002 | yes |
| XLOC_013702 | NM_001081298            | Lphn2         | chr3:14847 | 2.68      | 4.01      | 0.58 | 5.00E-005 | 8.65E-004 | yes |
| XLOC_010773 | NM_026615               | Urm1          | chr2:29682 | 18.78     | 28.11     | 0.58 | 6.50E-004 | 7.51E-003 | yes |
| XLOC_007098 | NM_025412               | Pycr1         | chr15:7574 | 9.31      | 13.94     | 0.58 | 5.60E-003 | 4.09E-002 | yes |
| XLOC_004213 | NM_146033               | Ankmy2        | chr12:368E | 4.59      | 6.86      | 0.58 | 1.95E-003 | 1.80E-002 | yes |
| XLOC_004009 | NM_001167680;NM_172572  | Rhbdf2        | chr11:1164 | 20.27     | 30.29     | 0.58 | 5.00E-005 | 8.65E-004 | yes |
| XLOC_009507 | NM_172631               | D18Erd653e    | chr18:680E | 1.40      | 2.10      | 0.58 | 5.35E-003 | 3.95E-002 | yes |
| XLOC_010360 | NM_172442               | Dtx4          | chr19:1254 | 2.34      | 3.49      | 0.58 | 8.00E-004 | 8.94E-003 | yes |
| XLOC_002685 | NM_177369               | Myh8          | chr11:670E | 2.41      | 3.59      | 0.58 | 1.20E-003 | 1.24E-002 | yes |
| XLOC_007001 | NM_001102458;NM_018745  | Azin1         | chr15:3841 | 6.32      | 9.42      | 0.58 | 5.00E-005 | 8.65E-004 | yes |
| XLOC_014893 | NM_172702               | Serinc2       | chr4:12993 | 33.51     | 49.85     | 0.57 | 5.00E-005 | 8.65E-004 | yes |
| XLOC_017489 | NM_175101               | Tmem111       | chr6:1134E | 47.64     | 70.83     | 0.57 | 5.00E-005 | 8.65E-004 | yes |
| XLOC_010722 | NM_009849               | Entpd2        | chr2:25251 | 4.07      | 6.04      | 0.57 | 3.50E-004 | 4.67E-003 | yes |
| XLOC_002488 | NM_009288               | Stk10         | chr11:3243 | 7.21      | 10.70     | 0.57 | 1.65E-003 | 1.59E-002 | yes |
| XLOC_021253 | NM_007875               | Dpaqt1        | chr9:44134 | 15.84     | 23.51     | 0.57 | 4.00E-004 | 5.20E-003 | yes |
| XLOC_014008 | NM_028132               | Pgm2          | chr4:99602 | 649.27    | 963.26    | 0.57 | 3.50E-004 | 4.67E-003 | yes |
| XLOC_005411 | NM_025588               | Exoc2         | chr13:309C | 11.71     | 17.37     | 0.57 | 5.00E-005 | 8.65E-004 | yes |
| XLOC_020717 | NM_145599               | Tmem184c      | chr8:8011E | 2.89      | 4.29      | 0.57 | 3.00E-004 | 4.11E-003 | yes |
| XLOC_008439 | NM_031176               | Thxh          | chr17:348C | 29.41     | 43.57     | 0.57 | 5.00E-005 | 8.65E-004 | yes |
| XLOC_008656 | NM_019919;NM_206958     | Ltbp1         | chr17:754C | 3.03      | 4.48      | 0.57 | 5.00E-005 | 8.65E-004 | yes |
| XLOC_002554 | NM_175643               | Adamts2       | chr11:5041 | 19.06     | 28.21     | 0.57 | 1.50E-004 | 2.26E-003 | yes |
| XLOC_007706 | NM_144854               | ORF63         | chr16:875E | 18.38     | 27.20     | 0.57 | 5.00E-004 | 6.18E-003 | yes |
| XLOC_002854 | NM_010927               | Nos2          | chr11:7873 | 3.87      | 5.73      | 0.56 | 1.70E-003 | 1.63E-002 | yes |
| XLOC_002181 | NM_198021               | Scyl2         | chr10:891C | 13.51     | 19.98     | 0.56 | 5.00E-005 | 8.65E-004 | yes |
| XLOC_003417 | NM_178626               | Cdc42se2      | chr11:5453 | 32.46     | 47.99     | 0.56 | 5.00E-005 | 8.65E-004 | yes |
| XLOC_001509 | NM_001081347            | Rhobtbl1      | chr10:6867 | 3.16      | 4.68      | 0.56 | 1.00E-003 | 1.08E-002 | yes |
| XLOC_015691 | NM_013560               | Hspbl         | chr5:1363E | 107.05    | 158.21    | 0.56 | 5.00E-005 | 8.65E-004 | yes |
| XLOC_013337 | NM_019745               | Pdcd10        | chr3:7532C | 10.48     | 15.49     | 0.56 | 3.50E-004 | 4.67E-003 | yes |
| XLOC_021273 | NM_001145947;NM_011792  | Bace1         | chr9:4564E | 18.07     | 26.69     | 0.56 | 5.00E-005 | 8.65E-004 | yes |
| XLOC_006680 | NM_144549               | Trib1         | chr15:594E | 7.18      | 10.61     | 0.56 | 2.50E-004 | 3.51E-003 | yes |
| XLOC_010470 | NM_199447               | Rrp12         | chr19:4193 | 18.08     | 26.71     | 0.56 | 5.00E-005 | 8.65E-004 | yes |
| XLOC_017763 | NM_001159714;NM_027328  | Prpf31        | chr7:3581E | 13.54     | 19.99     | 0.56 | 3.00E-004 | 4.11E-003 | yes |
| XLOC_016285 | NM_010368               | Gusb          | chr5:1304E | 9.99      | 14.74     | 0.56 | 1.50E-004 | 2.26E-003 | yes |
| XLOC_002282 | NM_001166413;NM_028027  | Arhgef25      | chr10:126E | 12.60     | 18.58     | 0.56 | 5.00E-004 | 6.18E-003 | yes |
| XLOC_010270 | NM_026912               | Snx15         | chr19:611E | 9.62      | 14.18     | 0.56 | 5.80E-003 | 4.19E-002 | yes |
| XLOC_016933 | NM_027920               | March8        | chr6:1162E | 24.50     | 36.10     | 0.56 | 5.00E-005 | 8.65E-004 | yes |
| XLOC_018512 | NM_020606               | Parva         | chr7:11957 | 6.83      | 10.06     | 0.56 | 5.00E-005 | 8.65E-004 | yes |
| XLOC_020941 | NM_172288               | Nupl33        | chr8:1264E | 13.45     | 19.81     | 0.56 | 5.00E-005 | 8.65E-004 | yes |
| XLOC_003513 | NM_021329               | Rangrf        | chr11:687E | 47.00     | 69.12     | 0.56 | 1.00E-004 | 1.63E-003 | yes |
| XLOC_010039 | NM_021525               | Rcl1          | chr19:2917 | 5.59      | 8.22      | 0.56 | 4.25E-003 | 3.30E-002 | yes |
| XLOC_015654 | NM_001081342            | Gpr133        | chr5:1296C | 4.97      | 7.31      | 0.56 | 1.45E-003 | 1.43E-002 | yes |
| XLOC_009324 | NM_011755               | Zfp35         | chr18:2414 | 10.04     | 14.76     | 0.56 | 9.00E-004 | 9.88E-003 | yes |
| XLOC_008431 | NM_010929               | Notch4        | chr17:347C | 10.06     | 14.77     | 0.56 | 5.00E-005 | 8.65E-004 | yes |
| XLOC_022002 | NM_001195431;NM_012043  | Islr          | chr9:58004 | 8.84      | 12.99     | 0.55 | 1.00E-004 | 1.63E-003 | yes |
| XLOC_022869 | NM_010797;NM_183151     | Mid1          | chrX:1661E | 17.93     | 26.34     | 0.55 | 1.50E-004 | 2.26E-003 | yes |
| XLOC_021413 | NM_007585               | Anxa2         | chr9:69301 | 78.67     | 115.42    | 0.55 | 5.00E-005 | 8.65E-004 | yes |
| XLOC_007648 | NM_020509               | Retnla        | chr16:488A | 18.90     | 27.72     | 0.55 | 2.60E-003 | 2.24E-002 | yes |
| XLOC_011188 | NM_019454               | Dll4          | chr2:11914 | 11.29     | 16.55     | 0.55 | 3.00E-004 | 4.11E-003 | yes |
| XLOC_016572 | NM_012057               | Irf5          | chr6:2947E | 31.97     | 46.86     | 0.55 | 5.00E-005 | 8.65E-004 | yes |
| XLOC_012994 | NM_009323               | Tbx15         | chr3:99057 | 177.59    | 260.27    | 0.55 | 5.00E-005 | 8.65E-004 | yes |
| XLOC_015621 | NM_175423               | Orail         | chr5:1234E | 38.49     | 56.40     | 0.55 | 1.50E-004 | 2.26E-003 | yes |
| XLOC_008727 | NM_010515               | Igf2r         | chr17:1287 | 21.94     | 32.13     | 0.55 | 5.00E-005 | 8.65E-004 | yes |
| XLOC_009212 | NM_001163622;NM_001163E | Prepl         | chr17:8542 | 14.03     | 20.54     | 0.55 | 2.50E-004 | 3.51E-003 | yes |
| XLOC_002923 | NM_133215               | Mtmr4         | chr11:874C | 3.52      | 5.15      | 0.55 | 1.50E-004 | 2.26E-003 | yes |
| XLOC_015231 | NM_009207               | Slc4a2        | chr5:23931 | 7.16      | 10.47     | 0.55 | 4.00E-004 | 5.20E-003 | yes |
| XLOC_000279 | NM_001039126;NM_023046  | Asb1          | chr1:93437 | 18.45     | 26.96     | 0.55 | 5.00E-005 | 8.65E-004 | yes |
| XLOC_023281 | NM_001033600;NM_019477  | Acs14         | chrX:1387E | 5.58      | 8.15      | 0.55 | 5.00E-005 | 8.65E-004 | yes |
| XLOC_005123 | NM_025596               | Prelid1       | chr13:5542 | 15.24     | 22.28     | 0.55 | 1.50E-004 | 2.26E-003 | yes |
| XLOC_007376 | NM_146065               | Atf7          | chr15:1023 | 3.00      | 4.38      | 0.55 | 2.50E-003 | 2.17E-002 | yes |
| XLOC_003876 | NM_012037               | Vat1          | chr11:1013 | 7.44      | 10.86     | 0.55 | 4.80E-003 | 3.62E-002 | yes |
| XLOC_021108 | NM_010700               | Ldlr          | chr9:2152E | 5.40      | 7.88      | 0.55 | 9.50E-004 | 1.03E-002 | yes |
| XLOC_019836 | -                       | -             | chr7:59003 | 12'193.60 | 17'795.50 | 0.55 | 4.50E-004 | 5.73E-003 | yes |

gene\_exp\_diff\_significant

|             |                          |               |            |        |          |      |           |           |     |
|-------------|--------------------------|---------------|------------|--------|----------|------|-----------|-----------|-----|
| XLOC_019110 | NM_001024707             | Lrp3          | chr7:35971 | 8.01   | 11.69    | 0.54 | 5.50E-004 | 6.64E-003 | yes |
| XLOC_004003 | NM_001162872;NM_016857   | Exoc7         | chr11:1161 | 17.70  | 25.79    | 0.54 | 5.00E-005 | 8.65E-004 | yes |
| XLOC_010377 | NM_011600                | Tle4          | chr19:1452 | 4.13   | 6.02     | 0.54 | 5.00E-005 | 8.65E-004 | yes |
| XLOC_006574 | NM_024188                | Oxct1         | chr15:397C | 233.29 | 339.77   | 0.54 | 5.00E-005 | 8.65E-004 | yes |
| XLOC_008886 | NM_027060;NM_172618      | Btbd9         | chr17:3035 | 2.69   | 3.92     | 0.54 | 6.00E-004 | 7.04E-003 | yes |
| XLOC_000429 | NM_022018                | Fam129a       | chr1:15341 | 12.01  | 17.49    | 0.54 | 7.50E-004 | 8.46E-003 | yes |
| XLOC_010105 | NM_020033                | Ankrd2        | chr19:4211 | 137.67 | 200.46   | 0.54 | 5.00E-005 | 8.65E-004 | yes |
| XLOC_021603 | NM_025858;NM_026381      | Shisa5        | chr9:10894 | 23.24  | 33.82    | 0.54 | 4.00E-004 | 5.20E-003 | yes |
| XLOC_017415 | NM_054041                | Antxr1        | chr6:87083 | 11.60  | 16.87    | 0.54 | 5.00E-005 | 8.65E-004 | yes |
| XLOC_021387 | NM_020043                | Igdcc4        | chr9:64949 | 5.82   | 8.47     | 0.54 | 5.00E-005 | 8.65E-004 | yes |
| XLOC_008438 | NM_017406                | Atf6b         | chr17:347E | 11.48  | 16.70    | 0.54 | 5.80E-003 | 4.19E-002 | yes |
| XLOC_012145 | NM_026271                | Fibin         | chr2:1102C | 7.07   | 10.28    | 0.54 | 4.50E-003 | 3.44E-002 | yes |
| XLOC_002245 | NM_026570                | Yeats4        | chr10:1166 | 11.33  | 16.46    | 0.54 | 2.25E-003 | 2.01E-002 | yes |
| XLOC_010307 | NM_001160356             | AI462493      | chr19:8954 | 33.32  | 48.39    | 0.54 | 5.00E-004 | 6.18E-003 | yes |
| XLOC_004040 | NM_009609                | Actl1         | chr11:1202 | 328.27 | 476.47   | 0.54 | 5.00E-005 | 8.65E-004 | yes |
| XLOC_009332 | NM_172965                | Sapl30        | chr18:3179 | 9.86   | 14.31    | 0.54 | 1.40E-003 | 1.40E-002 | yes |
| XLOC_022703 | NM_008828                | Pgk1          | chrX:1033E | 699.13 | 1'014.46 | 0.54 | 1.00E-004 | 1.63E-003 | yes |
| XLOC_007507 | NM_013805                | Cldn5         | chr16:1877 | 24.97  | 36.23    | 0.54 | 1.50E-004 | 2.26E-003 | yes |
| XLOC_019197 | NM_001112701;NM_011181   | Cyth2         | chr7:53062 | 19.04  | 27.61    | 0.54 | 5.00E-004 | 6.18E-003 | yes |
| XLOC_019601 | NM_019419                | Arl6ip1       | chr7:1252E | 6.29   | 9.13     | 0.54 | 3.10E-003 | 2.56E-002 | yes |
| XLOC_016775 | NM_026696                | O610030E20Rik | chr6:72297 | 2.85   | 4.13     | 0.54 | 6.00E-004 | 7.04E-003 | yes |
| XLOC_013070 | NM_028044                | Cnn3          | chr3:12112 | 17.63  | 25.55    | 0.53 | 5.00E-005 | 8.65E-004 | yes |
| XLOC_015044 | NM_011122                | Plod1         | chr4:1472E | 17.92  | 25.95    | 0.53 | 5.00E-005 | 8.65E-004 | yes |
| XLOC_000997 | NM_001042485;NM_020588   | Tmem183a      | chr1:1362A | 2.71   | 3.93     | 0.53 | 4.50E-004 | 5.73E-003 | yes |
| XLOC_014371 | NM_001004156             | Plekhhg5      | chr4:15147 | 11.36  | 16.44    | 0.53 | 5.00E-005 | 8.65E-004 | yes |
| XLOC_020405 | NM_001145896;NM_00114545 | Gsel          | chr8:12301 | 6.95   | 10.06    | 0.53 | 2.50E-004 | 3.51E-003 | yes |
| XLOC_001159 | NM_026725                | Dusp23        | chr1:1745E | 53.08  | 76.85    | 0.53 | 5.00E-005 | 8.65E-004 | yes |
| XLOC_021895 | NM_178644                | Oaf           | chr9:4302E | 8.56   | 12.39    | 0.53 | 6.95E-003 | 4.79E-002 | yes |
| XLOC_015400 | NM_011626                | Tmem165       | chr5:76612 | 4.28   | 6.18     | 0.53 | 2.85E-003 | 2.39E-002 | yes |
| XLOC_002438 | NM_007912;NM_207655      | Egfr          | chr11:1665 | 3.50   | 5.06     | 0.53 | 6.05E-003 | 4.29E-002 | yes |
| XLOC_009502 | NM_026473                | Tubb6         | chr18:675E | 25.84  | 37.36    | 0.53 | 5.00E-004 | 6.18E-003 | yes |
| XLOC_005119 | NM_153131                | Unc5a         | chr13:550E | 12.98  | 18.74    | 0.53 | 5.00E-005 | 8.65E-004 | yes |
| XLOC_015678 | NM_001190437;NM_145215   | Abhd11        | chr5:1354E | 30.11  | 43.46    | 0.53 | 5.00E-005 | 8.65E-004 | yes |
| XLOC_006750 | NM_133800                | Nol12         | chr15:787E | 16.58  | 23.93    | 0.53 | 8.00E-004 | 8.94E-003 | yes |
| XLOC_008400 | NM_172619;NR_037707;NR   | Adamts10      | chr17:336E | 2.77   | 3.99     | 0.53 | 2.10E-003 | 1.91E-002 | yes |
| XLOC_021719 | NM_001081395             | Amotl1        | chr9:1434E | 94.96  | 136.93   | 0.53 | 5.00E-005 | 8.65E-004 | yes |
| XLOC_000991 | NM_001167949;NM_213616   | Atp2b4        | chr1:1355E | 3.81   | 5.49     | 0.53 | 5.00E-005 | 8.65E-004 | yes |
| XLOC_002487 | NM_173784                | Ubt2          | chr11:323E | 2.97   | 4.28     | 0.53 | 2.85E-003 | 2.39E-002 | yes |
| XLOC_015674 | NM_053266                | Gtf2ird2      | chr5:1346E | 2.61   | 3.76     | 0.53 | 3.30E-003 | 2.68E-002 | yes |
| XLOC_010253 | NM_00114595;NM_0011144   | Ehbp111       | chr19:5707 | 120.79 | 173.94   | 0.53 | 5.00E-005 | 8.65E-004 | yes |
| XLOC_003648 | NM_199199                | Tmem199       | chr11:7832 | 17.72  | 25.51    | 0.53 | 1.65E-003 | 1.59E-002 | yes |
| XLOC_014836 | NM_001199136;NM_0011991  | Macf1         | chr4:12302 | 12.53  | 18.03    | 0.53 | 5.00E-005 | 8.65E-004 | yes |
| XLOC_019342 | NM_133722                | Fam108c       | chr7:91257 | 7.72   | 11.10    | 0.52 | 3.05E-003 | 2.53E-002 | yes |
| XLOC_006504 | NM_177715                | Kctd12        | chr14:1033 | 1.96   | 2.82     | 0.52 | 2.50E-004 | 3.51E-003 | yes |
| XLOC_019900 | NM_001122818;NM_015801   | Pnpla6        | chr8:3515E | 6.96   | 9.99     | 0.52 | 1.80E-003 | 1.70E-002 | yes |
| XLOC_009826 | NM_172252                | Mrpl21        | chr19:328E | 20.73  | 29.78    | 0.52 | 1.60E-003 | 1.55E-002 | yes |
| XLOC_010384 | NM_017375                | Ostf1         | chr19:186E | 11.39  | 16.36    | 0.52 | 2.50E-004 | 3.51E-003 | yes |
| XLOC_000241 | NM_172974                | Cops7b        | chr1:8848E | 6.93   | 9.95     | 0.52 | 2.80E-003 | 2.36E-002 | yes |
| XLOC_012383 | NM_001195390;NM_133850   | Comm7         | chr2:15344 | 5.40   | 7.75     | 0.52 | 4.35E-003 | 3.36E-002 | yes |
| XLOC_010416 | NM_001081213             | Ermp1         | chr19:296E | 5.04   | 7.23     | 0.52 | 3.50E-004 | 4.67E-003 | yes |
| XLOC_003617 | NM_138950                | Wdr81         | chr11:752E | 4.44   | 6.37     | 0.52 | 5.50E-004 | 6.64E-003 | yes |
| XLOC_016813 | NM_001077694;NM_021469   | Dysf          | chr6:8395E | 51.86  | 74.34    | 0.52 | 5.00E-005 | 8.65E-004 | yes |
| XLOC_021608 | NM_007658                | Cdc25a        | chr9:10977 | 4.33   | 6.20     | 0.52 | 3.30E-003 | 2.68E-002 | yes |
| XLOC_012778 | NM_008772                | P2ry1         | chr3:6080E | 4.01   | 5.75     | 0.52 | 1.20E-003 | 1.24E-002 | yes |
| XLOC_013296 | NM_009174                | Siah2         | chr3:5847E | 8.08   | 11.56    | 0.52 | 1.75E-003 | 1.66E-002 | yes |
| XLOC_023258 | NM_001168578;NM_025703   | Tcea18        | chrX:1327C | 6.39   | 9.14     | 0.52 | 2.60E-003 | 2.24E-002 | yes |
| XLOC_007429 | NM_031184                | Glis2         | chr16:4594 | 6.99   | 10.00    | 0.52 | 6.85E-003 | 4.72E-002 | yes |
| XLOC_004514 | NM_001097621             | Kif26a        | chr12:1133 | 6.08   | 8.70     | 0.52 | 1.35E-003 | 1.36E-002 | yes |
| XLOC_000122 | NM_009676                | Aox1          | chr1:5808E | 9.41   | 13.46    | 0.52 | 2.00E-004 | 2.93E-003 | yes |
| XLOC_015433 | NM_026735                | Mobkl1a       | chr5:8914E | 4.32   | 6.17     | 0.52 | 5.00E-005 | 8.65E-004 | yes |
| XLOC_002904 | NM_001115009;NM_194341   | Synrg         | chr11:8377 | 8.28   | 11.84    | 0.52 | 7.00E-004 | 8.00E-003 | yes |
| XLOC_022106 | NM_001081282             | Ibtk          | chr9:8558C | 45.01  | 64.34    | 0.52 | 5.00E-005 | 8.65E-004 | yes |
| XLOC_003925 | NM_001130187;NM_031878   | Smarcd2       | chr11:1061 | 10.96  | 15.65    | 0.51 | 1.50E-003 | 1.47E-002 | yes |
| XLOC_021402 | NM_011149                | Ppib          | chr9:65907 | 24.49  | 34.94    | 0.51 | 5.50E-004 | 6.64E-003 | yes |
| XLOC_009472 | NM_001042605;NM_010545   | Cd74          | chr18:609E | 79.59  | 113.49   | 0.51 | 5.00E-005 | 8.65E-004 | yes |
| XLOC_007446 | NM_011955                | Nubp1         | chr16:1041 | 9.60   | 13.68    | 0.51 | 5.90E-003 | 4.23E-002 | yes |
| XLOC_019950 | NM_026792                | Agpat5        | chr8:1884E | 7.22   | 10.27    | 0.51 | 1.00E-004 | 1.63E-003 | yes |
| XLOC_009291 | NM_130449                | Colec12       | chr18:9707 | 7.53   | 10.70    | 0.51 | 1.25E-003 | 1.28E-002 | yes |
| XLOC_008647 | NM_027166                | Ypel5         | chr17:731E | 3.73   | 5.29     | 0.51 | 1.00E-004 | 1.63E-003 | yes |
| XLOC_002505 | NM_001166553;NM_028862   | Rnf145        | chr11:443E | 4.92   | 6.98     | 0.50 | 2.95E-003 | 2.45E-002 | yes |
| XLOC_018258 | NM_001191051;NM_175215   | Lysmd4        | chr7:74367 | 10.20  | 14.46    | 0.50 | 3.50E-003 | 2.81E-002 | yes |
| XLOC_011212 | NM_011354                | Serf2         | chr2:12127 | 59.98  | 85.05    | 0.50 | 5.00E-005 | 8.65E-004 | yes |
| XLOC_020136 | NM_010592                | Jund          | chr8:73221 | 12.11  | 17.15    | 0.50 | 5.00E-005 | 8.65E-004 | yes |
| XLOC_006351 | NM_026819                | Dhrs1         | chr14:5635 | 26.50  | 37.50    | 0.50 | 1.50E-004 | 2.26E-003 | yes |
| XLOC_010793 | NM_028846                | Usp20         | chr2:30837 | 9.84   | 13.93    | 0.50 | 1.25E-003 | 1.28E-002 | yes |
| XLOC_000732 | NM_026430                | Uxs1          | chr1:43807 | 4.89   | 6.92     | 0.50 | 7.30E-003 | 4.96E-002 | yes |
| XLOC_000150 | NM_001077403;NM_0010774  | Nrp2          | chr1:6274E | 8.74   | 12.36    | 0.50 | 2.00E-004 | 2.93E-003 | yes |
| XLOC_016000 | NM_178599                | Comm8         | chr5:7254E | 7.03   | 9.95     | 0.50 | 1.80E-003 | 1.70E-002 | yes |
| XLOC_015268 | NM_133918                | Emilin1       | chr5:3121E | 13.58  | 19.19    | 0.50 | 3.45E-003 | 2.78E-002 | yes |
| XLOC_004596 | NM_153198;NM_177993      | Hbp1          | chr12:3233 | 68.10  | 96.20    | 0.50 | 5.00E-005 | 8.65E-004 | yes |
| XLOC_009848 | NM_027196                | Pold4         | chr19:4231 | 14.86  | 20.99    | 0.50 | 7.25E-003 | 4.94E-002 | yes |
| XLOC_009849 | NM_001162946;NM_008797   | Pcx           | chr19:451C | 27.73  | 39.16    | 0.50 | 5.00E-005 | 8.65E-004 | yes |
| XLOC_020026 | NM_175136                | Rnf122        | chr8:3222E | 3.81   | 5.38     | 0.50 | 4.95E-003 | 3.71E-002 | yes |
| XLOC_018893 | NM_027189                | Gemin7        | chr7:2015C | 54.61  | 77.07    | 0.50 | 1.00E-004 | 1.63E-003 | yes |
| XLOC_007331 | NM_001113545;NM_023063   | Lima1         | chr15:996C | 9.29   | 13.10    | 0.50 | 2.50E-004 | 3.51E-003 | yes |
| XLOC_010675 | NM_026162                | Ptxdc2        | chr2:16277 | 21.06  | 29.70    | 0.50 | 5.00E-004 | 6.18E-003 | yes |
| XLOC_015103 | NM_147776                | Vwal          | chr4:15514 | 18.11  | 25.53    | 0.50 | 5.50E-004 | 6.64E-003 | yes |
| XLOC_012496 | NM_001037177;NM_0010371  | Nfatc2        | chr2:1683C | 3.93   | 5.54     | 0.50 | 6.55E-003 | 4.56E-002 | yes |
| XLOC_001806 | NM_054078                | Baz2a         | chr10:127E | 8.86   | 12.48    | 0.49 | 5.00E-005 | 8.65E-004 | yes |
| XLOC_008208 | NM_022315                | Smoc2         | chr17:1441 | 96.96  | 136.59   | 0.49 | 5.00E-005 | 8.65E-004 | yes |
| XLOC_008859 | NM_007523                | Bak1          | chr17:271E | 9.27   | 13.06    | 0.49 | 1.50E-004 | 2.26E-003 | yes |
| XLOC_002420 | NM_001146308;NM_0011464  | Dbn1          | chr11:568E | 20.54  | 28.90    | 0.49 | 1.05E-003 | 1.12E-002 | yes |
| XLOC_013150 | NM_009740                | Bcl10         | chr3:1455E | 2.67   | 3.76     | 0.49 | 7.00E-003 | 4.80E-002 | yes |
| XLOC_006056 | NM_021877                | Hr            | chr14:709E | 86.50  | 121.65   | 0.49 | 5.00E-005 | 8.65E-004 | yes |
| XLOC_015959 | NM_024236                | Qdpr          | chr5:4582E | 65.49  | 92.08    | 0.49 | 5.00E-005 | 8.65E-004 | yes |
| XLOC_009221 | NM_007589                | Calm2         | chr17:878E | 79.93  | 112.38   | 0.49 | 5.00E-005 | 8.65E-004 | yes |
| XLOC_008976 | NM_001198831;NM_0011984  | Ddr1          | chr17:3581 | 6.76   | 9.49     | 0.49 | 1.35E-003 | 1.36E-002 | yes |
| XLOC_005939 | NM_001145921;NM_0011454  | Arhgef40      | chr14:526C | 13.89  | 19.50    | 0.49 | 4.60E-003 | 3.50E-002 | yes |
| XLOC_001217 | NM_133684                | Mosc2         | chr1:1866E | 22.46  | 31.51    | 0.49 | 5.00E-005 | 8.65E-004 | yes |

gene\_exp\_diff\_significant

|             |                         |                |            |        |        |      |           |           |     |
|-------------|-------------------------|----------------|------------|--------|--------|------|-----------|-----------|-----|
| XLOC_013246 | NM_009673               | Anxa5          | chr3:36347 | 78.16  | 109.67 | 0.49 | 5.00E-005 | 8.65E-004 | yes |
| XLOC_018577 | NM_011952               | Mapk3          | chr7:13390 | 47.84  | 67.11  | 0.49 | 2.00E-004 | 2.93E-003 | yes |
| XLOC_002625 | NM_178218               | Hist3h2a       | chr11:5876 | 6.84   | 9.58   | 0.49 | 6.85E-003 | 4.72E-002 | yes |
| XLOC_007385 | NM_010577               | Itga5          | chr15:1031 | 12.81  | 17.94  | 0.49 | 1.40E-003 | 1.40E-002 | yes |
| XLOC_011353 | NM_153781               | Pygb           | chr2:15061 | 3.62   | 5.07   | 0.49 | 2.15E-003 | 1.95E-002 | yes |
| XLOC_004528 | NM_007763               | Crip1          | chr12:1143 | 76.28  | 106.79 | 0.49 | 6.50E-004 | 7.51E-003 | yes |
| XLOC_007959 | NM_007508               | Atp6v1a        | chr16:4408 | 7.96   | 11.14  | 0.48 | 4.00E-004 | 5.20E-003 | yes |
| XLOC_000078 | NM_008696               | Map4k4         | chr1:39957 | 4.65   | 6.50   | 0.48 | 1.00E-004 | 1.63E-003 | yes |
| XLOC_022076 | NM_015806;NM_027418     | Mapk6          | chr9:75234 | 7.18   | 10.04  | 0.48 | 5.00E-005 | 8.65E-004 | yes |
| XLOC_009475 | NM_001146268;NM_008809  | Pdgfrb         | chr18:6120 | 17.89  | 25.00  | 0.48 | 5.00E-005 | 8.65E-004 | yes |
| XLOC_019013 | NM_001113549;NM_175641  | Ltbp4          | chr7:28090 | 129.73 | 181.34 | 0.48 | 5.00E-005 | 8.65E-004 | yes |
| XLOC_017588 | NM_175414               | Tspan9         | chr6:12791 | 32.32  | 45.18  | 0.48 | 5.00E-005 | 8.65E-004 | yes |
| XLOC_021369 | NM_001083927;NM_0010834 | Tle3           | chr9:61220 | 2.41   | 3.36   | 0.48 | 5.65E-003 | 4.12E-002 | yes |
| XLOC_020832 | NM_177699               | Fhod1          | chr8:10785 | 36.02  | 50.29  | 0.48 | 5.00E-005 | 8.65E-004 | yes |
| XLOC_002966 | NM_201609               | Zfp652         | chr11:9561 | 16.68  | 23.27  | 0.48 | 1.15E-003 | 1.20E-002 | yes |
| XLOC_020880 | NM_146218               | Rfwd3          | chr8:11379 | 5.90   | 8.23   | 0.48 | 5.60E-003 | 4.09E-002 | yes |
| XLOC_005994 | NM_026401               | Mrp63          | chr14:5844 | 7.60   | 10.60  | 0.48 | 7.00E-004 | 8.00E-003 | yes |
| XLOC_005065 | NM_025387               | Tmem14c        | chr13:4111 | 47.97  | 66.85  | 0.48 | 2.50E-004 | 3.51E-003 | yes |
| XLOC_007175 | NM_001013360;NM_0010133 | Cbx6,Npcd,Nptx | chr15:7961 | 20.62  | 28.72  | 0.48 | 1.00E-004 | 1.63E-003 | yes |
| XLOC_019016 | NM_011116               | Pld3           | chr7:28317 | 22.94  | 31.95  | 0.48 | 1.40E-003 | 1.40E-002 | yes |
| XLOC_023116 | NM_010227               | Flna           | chrX:71468 | 38.60  | 53.75  | 0.48 | 5.00E-005 | 8.65E-004 | yes |
| XLOC_001622 | NM_008655               | Gadd45b        | chr10:8039 | 36.55  | 50.90  | 0.48 | 2.50E-004 | 3.51E-003 | yes |
| XLOC_004996 | NM_023422               | Hist1h2bc      | chr13:2377 | 113.34 | 157.73 | 0.48 | 1.50E-004 | 2.26E-003 | yes |
| XLOC_013156 | NM_138744               | Ssx2ip         | chr3:14606 | 14.18  | 19.73  | 0.48 | 1.00E-004 | 1.63E-003 | yes |
| XLOC_019758 | NM_001130443;NM_0011304 | Hras1          | chr7:14837 | 91.29  | 126.98 | 0.48 | 5.00E-005 | 8.65E-004 | yes |
| XLOC_010054 | NM_010799               | Minpp1         | chr19:3256 | 13.64  | 18.96  | 0.47 | 1.45E-003 | 1.43E-002 | yes |
| XLOC_023112 | NM_008224               | Hcfc1          | chrX:71188 | 48.56  | 67.48  | 0.47 | 5.00E-005 | 8.65E-004 | yes |
| XLOC_001885 | NM_025418               | Vtal           | chr10:1437 | 19.99  | 27.76  | 0.47 | 3.15E-003 | 2.58E-002 | yes |
| XLOC_011366 | NM_009328               | Tcf15          | chr2:15196 | 24.72  | 34.33  | 0.47 | 3.75E-003 | 2.98E-002 | yes |
| XLOC_009489 | NM_001114386;NM_031881  | Nedd41         | chr18:6504 | 2.85   | 3.95   | 0.47 | 5.00E-005 | 8.65E-004 | yes |
| XLOC_003078 | NM_008175               | Grn            | chr11:1022 | 46.36  | 64.39  | 0.47 | 2.50E-004 | 3.51E-003 | yes |
| XLOC_001683 | NM_029166               | Uhrf1bp11      | chr10:8920 | 5.44   | 7.55   | 0.47 | 1.25E-003 | 1.28E-002 | yes |
| XLOC_012345 | NM_009976               | Cst3           | chr2:14869 | 657.05 | 911.99 | 0.47 | 1.00E-004 | 1.63E-003 | yes |
| XLOC_007149 | NM_009437               | Tst            | chr15:7822 | 17.93  | 24.87  | 0.47 | 2.75E-003 | 2.32E-002 | yes |
| XLOC_016014 | NM_001114660;NM_178672  | Scf2d          | chr5:74600 | 4.64   | 6.44   | 0.47 | 6.35E-003 | 4.46E-002 | yes |
| XLOC_022149 | NM_025485               | Mrs22          | chr9:98489 | 14.12  | 19.57  | 0.47 | 1.05E-003 | 1.12E-002 | yes |
| XLOC_007677 | NM_178647               | Cggbp1         | chr16:6485 | 4.24   | 5.88   | 0.47 | 6.50E-004 | 7.51E-003 | yes |
| XLOC_005645 | NM_010169               | F2r            | chr13:9637 | 3.79   | 5.26   | 0.47 | 4.20E-003 | 3.28E-002 | yes |
| XLOC_009179 | NM_133771               | Memo1          | chr17:7460 | 37.49  | 51.90  | 0.47 | 1.50E-004 | 2.26E-003 | yes |
| XLOC_013652 | NM_025509               | Ostc           | chr3:13039 | 21.07  | 29.17  | 0.47 | 8.50E-004 | 9.41E-003 | yes |
| XLOC_007707 | NM_007520               | Bach1          | chr16:8765 | 6.12   | 8.47   | 0.47 | 5.00E-005 | 8.65E-004 | yes |
| XLOC_003764 | NM_134021               | Pnpo           | chr11:9679 | 7.77   | 10.75  | 0.47 | 2.00E-003 | 1.84E-002 | yes |
| XLOC_013885 | NM_146142               | Tdrd7          | chr4:46000 | 4.90   | 6.78   | 0.47 | 3.15E-003 | 2.58E-002 | yes |
| XLOC_014522 | NM_172691               | B230312A22Rik  | chr4:43045 | 23.10  | 31.93  | 0.47 | 4.00E-004 | 5.20E-003 | yes |
| XLOC_016189 | NM_001077359;NM_0010773 | Git2           | chr5:11517 | 9.43   | 13.03  | 0.47 | 2.50E-004 | 3.51E-003 | yes |
| XLOC_020107 | NM_007509               | Atp6v1b2       | chr8:71561 | 37.68  | 52.07  | 0.47 | 5.00E-005 | 8.65E-004 | yes |
| XLOC_014297 | NM_172518               | Fbxo42         | chr4:14070 | 7.86   | 10.85  | 0.47 | 9.50E-004 | 1.03E-002 | yes |
| XLOC_007253 | NM_001159521;NM_138749  | Plxmb2         | chr15:8898 | 19.55  | 26.99  | 0.47 | 2.50E-004 | 3.51E-003 | yes |
| XLOC_002744 | NM_008876               | Pld2           | chr11:7035 | 7.29   | 10.07  | 0.46 | 1.45E-003 | 1.43E-002 | yes |
| XLOC_003001 | NM_010688               | Laspl          | chr11:9766 | 30.73  | 42.40  | 0.46 | 2.50E-004 | 3.51E-003 | yes |
| XLOC_019757 | NM_001172100;NM_0011721 | Rnh1           | chr7:14834 | 70.02  | 96.57  | 0.46 | 1.00E-004 | 1.63E-003 | yes |
| XLOC_021445 | NM_007555               | Bmp5           | chr9:75623 | 6.07   | 8.38   | 0.46 | 6.55E-003 | 4.56E-002 | yes |
| XLOC_002757 | NM_026559               | Txnrd17        | chr11:7202 | 11.96  | 16.49  | 0.46 | 9.50E-004 | 1.03E-002 | yes |
| XLOC_006922 | NM_009319               | Tarbp2         | chr15:1023 | 24.76  | 34.13  | 0.46 | 1.70E-003 | 1.63E-002 | yes |
| XLOC_014931 | NM_080559               | Sh3bgrl3       | chr4:13366 | 41.36  | 56.99  | 0.46 | 3.00E-003 | 2.49E-002 | yes |
| XLOC_014705 | NM_146145               | Jak1           | chr4:10074 | 68.63  | 94.48  | 0.46 | 1.50E-004 | 2.26E-003 | yes |
| XLOC_002727 | NM_030064               | Phf23          | chr11:6980 | 10.49  | 14.44  | 0.46 | 5.90E-003 | 4.23E-002 | yes |
| XLOC_014362 | NM_023119               | Eno1           | chr4:14961 | 36.89  | 50.77  | 0.46 | 8.50E-004 | 9.41E-003 | yes |
| XLOC_015354 | NM_144517               | Tbcd19         | chr5:54200 | 8.04   | 11.06  | 0.46 | 6.50E-004 | 7.51E-003 | yes |
| XLOC_010665 | NM_008961               | Pter           | chr2:12845 | 6.44   | 8.86   | 0.46 | 4.85E-003 | 3.65E-002 | yes |
| XLOC_010403 | NM_177474               | D19Bwg1357e    | chr19:2746 | 6.28   | 8.64   | 0.46 | 5.55E-003 | 4.08E-002 | yes |
| XLOC_001612 | NM_001100606;NM_019575  | Adat3,Scamp4   | chr10:8006 | 19.93  | 27.40  | 0.46 | 5.95E-003 | 4.25E-002 | yes |
| XLOC_003756 | NM_172300               | Ube2z          | chr11:9590 | 10.58  | 14.55  | 0.46 | 5.00E-004 | 6.18E-003 | yes |
| XLOC_018035 | NM_001037957;NM_010092  | Dyrk1b         | chr7:28964 | 95.93  | 131.83 | 0.46 | 5.00E-005 | 8.65E-004 | yes |
| XLOC_015074 | NM_001145929;NM_175152  | Thap3          | chr4:15135 | 24.93  | 34.25  | 0.46 | 2.70E-003 | 2.30E-002 | yes |
| XLOC_014485 | NM_134097               | Topors         | chr4:40206 | 7.97   | 10.95  | 0.46 | 3.00E-003 | 2.49E-002 | yes |
| XLOC_004061 | NM_026824               | Dus11          | chr11:1206 | 17.79  | 24.44  | 0.46 | 4.50E-004 | 5.73E-003 | yes |
| XLOC_018624 | NM_019564               | Htral          | chr7:13807 | 45.18  | 62.03  | 0.46 | 3.00E-004 | 4.11E-003 | yes |
| XLOC_020502 | NM_001024504;NM_0010424 | Dcunl2         | chr8:13255 | 50.39  | 69.18  | 0.46 | 4.00E-004 | 5.20E-003 | yes |
| XLOC_019007 | NM_053208               | Egln2          | chr7:27943 | 79.78  | 109.51 | 0.46 | 2.00E-004 | 2.93E-003 | yes |
| XLOC_022889 | NM_138603               | Ccdc22         | chrX:71356 | 21.10  | 28.96  | 0.46 | 6.10E-003 | 4.32E-002 | yes |
| XLOC_001122 | NM_009062               | Rgs4           | chr1:17167 | 9.66   | 13.26  | 0.46 | 3.85E-003 | 3.05E-002 | yes |
| XLOC_011588 | NM_029607               | 2310003C23Rik  | chr2:18044 | 32.94  | 45.16  | 0.45 | 5.00E-004 | 6.18E-003 | yes |
| XLOC_017523 | NM_053204;NM_178085     | Erc1           | chr6:11952 | 12.48  | 17.10  | 0.45 | 1.50E-004 | 2.26E-003 | yes |
| XLOC_021639 | NM_146229               | Dync11i1       | chr9:11459 | 21.97  | 30.10  | 0.45 | 2.50E-004 | 3.51E-003 | yes |
| XLOC_007608 | NM_030035               | Golgb1         | chr16:3686 | 7.73   | 10.58  | 0.45 | 1.50E-004 | 2.26E-003 | yes |
| XLOC_022195 | NM_029103               | Manf           | chr9:10678 | 17.26  | 23.62  | 0.45 | 1.15E-003 | 1.20E-002 | yes |
| XLOC_014886 | NM_001005506;NM_0011994 | Txlna          | chr4:12930 | 19.02  | 26.01  | 0.45 | 9.00E-004 | 9.88E-003 | yes |
| XLOC_009445 | NM_026386               | Snx2           | chr18:5333 | 18.94  | 25.91  | 0.45 | 9.50E-004 | 1.03E-002 | yes |
| XLOC_004779 | NM_011812               | Fbln5          | chr12:1029 | 3.96   | 5.41   | 0.45 | 1.60E-003 | 1.55E-002 | yes |
| XLOC_017485 | NM_133932               | Tada3          | chr6:11331 | 19.95  | 27.27  | 0.45 | 4.90E-003 | 3.68E-002 | yes |
| XLOC_008450 | NM_033444               | Clic1          | chr17:3516 | 28.91  | 39.51  | 0.45 | 2.05E-003 | 1.88E-002 | yes |
| XLOC_022126 | NM_194334               | Tbcd2b         | chr9:90096 | 6.05   | 8.27   | 0.45 | 4.40E-003 | 3.38E-002 | yes |
| XLOC_000129 | NM_009805;NM_207653     | Cflar          | chr1:58770 | 6.58   | 8.99   | 0.45 | 1.50E-003 | 1.47E-002 | yes |
| XLOC_007897 | NM_001128094;NM_0011280 | Atp13a3        | chr16:3031 | 4.58   | 6.25   | 0.45 | 2.50E-004 | 3.51E-003 | yes |
| XLOC_020943 | NM_133966               | Taf11          | chr8:12652 | 9.87   | 13.48  | 0.45 | 2.75E-003 | 2.32E-002 | yes |
| XLOC_007872 | NM_023794               | Etv5           | chr16:2238 | 6.89   | 9.40   | 0.45 | 6.50E-004 | 7.51E-003 | yes |
| XLOC_005633 | NM_011582               | Thbs4          | chr13:9352 | 137.34 | 187.28 | 0.45 | 1.50E-004 | 2.26E-003 | yes |
| XLOC_003627 | NM_007754               | Cpd            | chr11:7659 | 15.35  | 20.91  | 0.45 | 1.00E-004 | 1.63E-003 | yes |
| XLOC_009073 | NM_001163729;NM_027910  | Klhdc3         | chr17:4681 | 116.80 | 159.10 | 0.45 | 5.00E-005 | 8.65E-004 | yes |
| XLOC_000459 | NM_025474               | Mrs11          | chr1:16212 | 7.73   | 10.52  | 0.44 | 1.10E-003 | 1.16E-002 | yes |
| XLOC_016417 | NM_011669               | Usp12          | chr5:14754 | 9.84   | 13.38  | 0.44 | 5.00E-004 | 6.18E-003 | yes |
| XLOC_014290 | NM_173867               | Rcc2           | chr4:14025 | 2.40   | 3.26   | 0.44 | 6.35E-003 | 4.66E-002 | yes |
| XLOC_014879 | NM_008228               | Hdac1          | chr4:12915 | 15.90  | 21.62  | 0.44 | 5.75E-003 | 4.16E-002 | yes |
| XLOC_001633 | NM_001146687;NM_008844  | Pip5k1c        | chr10:8075 | 43.34  | 58.91  | 0.44 | 2.00E-004 | 2.93E-003 | yes |
| XLOC_007779 | NM_025821               | Carhsp1        | chr16:8658 | 11.84  | 16.09  | 0.44 | 4.25E-003 | 3.30E-002 | yes |
| XLOC_011436 | NM_019642               | Rpn2           | chr2:15703 | 44.61  | 60.62  | 0.44 | 1.00E-004 | 1.63E-003 | yes |
| XLOC_022841 | NM_025357               | Smpx           | chrX:15413 | 254.79 | 346.17 | 0.44 | 5.00E-005 | 8.65E-004 | yes |
| XLOC_006031 | NM_145944               | Ccdc25         | chr14:6645 | 4.48   | 6.08   | 0.44 | 3.15E-003 | 2.58E-002 | yes |

gene\_exp\_diff\_significant

|             |                               |               |            |        |         |      |           |           |     |
|-------------|-------------------------------|---------------|------------|--------|---------|------|-----------|-----------|-----|
| XLOC_009925 | NM_146093                     | Ubxn1         | chr19:8946 | 190.32 | 258.55  | 0.44 | 2.00E-004 | 2.93E-003 | yes |
| XLOC_020770 | NM_028007                     | Itfg1         | chr8:88241 | 17.83  | 24.22   | 0.44 | 5.00E-005 | 8.65E-004 | yes |
| XLOC_022482 | NM_019668                     | Ube2a         | chrX:34414 | 25.98  | 35.27   | 0.44 | 1.15E-003 | 1.20E-002 | yes |
| XLOC_005683 | NM_175171                     | Mast4         | chr13:1035 | 20.28  | 27.54   | 0.44 | 2.50E-004 | 3.51E-003 | yes |
| XLOC_006451 | NM_001135151;NM_0011351       | Slc39a14      | chr14:7070 | 4.80   | 6.52    | 0.44 | 2.70E-003 | 2.30E-002 | yes |
| XLOC_014488 | NM_001025444;NM_025545        | Aptx          | chr4:40629 | 4.84   | 6.58    | 0.44 | 5.85E-003 | 4.22E-002 | yes |
| XLOC_007598 | NM_008465                     | Kpna1         | chr16:3599 | 40.74  | 55.29   | 0.44 | 2.00E-004 | 2.93E-003 | yes |
| XLOC_002424 | NM_001005867;NM_028601        | Zmiz2         | chr11:6289 | 113.85 | 154.38  | 0.44 | 5.00E-005 | 8.65E-004 | yes |
| XLOC_014965 | NM_009861                     | Cdc42         | chr4:13687 | 140.14 | 189.98  | 0.44 | 5.00E-005 | 8.65E-004 | yes |
| XLOC_005382 | NM_010424                     | Hfe           | chr13:2379 | 12.59  | 17.07   | 0.44 | 1.50E-003 | 1.47E-002 | yes |
| XLOC_008839 | NM_133719                     | Metrn         | chr17:2593 | 56.93  | 77.13   | 0.44 | 6.00E-004 | 7.04E-003 | yes |
| XLOC_017444 | NM_018815                     | Nup210        | chr6:90963 | 34.28  | 46.43   | 0.44 | 2.50E-004 | 3.51E-003 | yes |
| XLOC_015598 | NM_028041                     | Ddx54         | chr5:12106 | 19.07  | 25.82   | 0.44 | 8.00E-004 | 8.94E-003 | yes |
| XLOC_008284 | NM_001039581;NM_013855        | Abca3         | chr17:2448 | 4.25   | 5.75    | 0.44 | 2.95E-003 | 2.45E-002 | yes |
| XLOC_012871 | NM_001113331;NM_011368        | Shc1          | chr3:89222 | 6.22   | 8.42    | 0.44 | 2.30E-003 | 2.04E-002 | yes |
| XLOC_014620 | NM_001045528                  | Fkbp15        | chr4:61961 | 16.39  | 22.18   | 0.44 | 3.05E-003 | 2.53E-002 | yes |
| XLOC_021105 | NM_021531;NM_153141           | Carm1         | chr9:21351 | 57.17  | 77.38   | 0.44 | 5.95E-003 | 4.25E-002 | yes |
| XLOC_018202 | NM_016974                     | Dbp           | chr7:52960 | 111.69 | 151.13  | 0.44 | 2.35E-003 | 2.08E-002 | yes |
| XLOC_013803 | NM_172988                     | Fbxl4         | chr4:22284 | 9.05   | 12.24   | 0.44 | 6.00E-004 | 7.04E-003 | yes |
| XLOC_007529 | NM_001081366                  | Vps8          | chr16:2142 | 9.10   | 12.32   | 0.44 | 4.25E-003 | 3.30E-002 | yes |
| XLOC_022390 | NM_173747                     | Gpkow         | chrX:72742 | 6.80   | 9.19    | 0.44 | 3.00E-003 | 2.49E-002 | yes |
| XLOC_015064 | NM_027460                     | Slc25a33      | chr4:14911 | 9.50   | 12.85   | 0.44 | 2.05E-003 | 1.88E-002 | yes |
| XLOC_004498 | NM_001048206;NM_011632        | Traf3         | chr12:1124 | 11.46  | 15.50   | 0.43 | 3.50E-004 | 4.67E-003 | yes |
| XLOC_002010 | NM_001146100;NM_010438        | Hkl1          | chr10:6173 | 6.84   | 9.24    | 0.43 | 2.85E-003 | 2.39E-002 | yes |
| XLOC_013127 | NM_007409                     | Adhl          | chr3:13794 | 40.08  | 54.12   | 0.43 | 3.50E-004 | 4.67E-003 | yes |
| XLOC_003568 | NM_178367                     | Dhx33         | chr11:7079 | 6.30   | 8.51    | 0.43 | 5.95E-003 | 4.25E-002 | yes |
| XLOC_009071 | NM_029091                     | Klc4          | chr17:4676 | 23.08  | 31.16   | 0.43 | 2.15E-003 | 1.95E-002 | yes |
| XLOC_010003 | NM_008139                     | Gnaq          | chr19:1620 | 5.16   | 6.97    | 0.43 | 1.55E-003 | 1.51E-002 | yes |
| XLOC_007758 | NM_001025432                  | Crebbp        | chr16:4084 | 13.93  | 18.79   | 0.43 | 7.50E-004 | 8.46E-003 | yes |
| XLOC_007097 | NM_023240;NM_029663           | Eef1d         | chr15:7572 | 53.41  | 72.04   | 0.43 | 3.00E-004 | 4.11E-003 | yes |
| XLOC_016381 | NM_001122730;NM_178242        | Tnrc18        | chr5:14320 | 6.44   | 8.68    | 0.43 | 2.50E-004 | 3.51E-003 | yes |
| XLOC_020295 | NM_009868                     | Cdh5          | chr8:10662 | 83.96  | 113.18  | 0.43 | 2.50E-004 | 3.51E-003 | yes |
| XLOC_006629 | NM_008304                     | Sdc2          | chr15:3285 | 10.84  | 14.61   | 0.43 | 4.00E-004 | 5.20E-003 | yes |
| XLOC_002304 | NM_010860                     | My16          | chr10:1279 | 175.56 | 236.52  | 0.43 | 2.50E-004 | 3.51E-003 | yes |
| XLOC_002004 | NM_013753                     | X99384        | chr10:6078 | 9.41   | 12.67   | 0.43 | 3.80E-003 | 3.01E-002 | yes |
| XLOC_005301 | NM_001081128                  | Mtr           | chr13:1227 | 3.21   | 4.32    | 0.43 | 5.00E-003 | 3.74E-002 | yes |
| XLOC_003025 | NM_001176528;NM_0011777       | Rara          | chr11:9879 | 13.11  | 17.64   | 0.43 | 2.30E-003 | 2.04E-002 | yes |
| XLOC_009207 | NM_001001806                  | Zfp3612       | chr17:8458 | 7.87   | 10.59   | 0.43 | 1.35E-003 | 1.36E-002 | yes |
| XLOC_000949 | NM_001085409;NM_133186        | Steap3        | chr1:12212 | 40.32  | 54.24   | 0.43 | 6.00E-004 | 7.04E-003 | yes |
| XLOC_007195 | NM_020507                     | Tob2          | chr15:8167 | 8.35   | 11.24   | 0.43 | 4.50E-004 | 5.73E-003 | yes |
| XLOC_020545 | NM_001159774;NM_010546        | Ikkbk         | chr8:23765 | 5.68   | 7.64    | 0.43 | 2.45E-003 | 2.14E-002 | yes |
| XLOC_005801 | NM_009502                     | Vcl           | chr14:2174 | 70.20  | 94.34   | 0.43 | 1.50E-004 | 2.26E-003 | yes |
| XLOC_001967 | NM_145743                     | Lacel1        | chr10:4203 | 14.52  | 19.50   | 0.43 | 2.45E-003 | 2.14E-002 | yes |
| XLOC_013789 | NM_181401                     | Tmem64        | chr4:15192 | 30.64  | 41.15   | 0.43 | 2.00E-004 | 2.93E-003 | yes |
| XLOC_013489 | NM_001163617;NM_0011636       | Tars2         | chr3:95543 | 20.25  | 27.21   | 0.43 | 1.60E-003 | 1.55E-002 | yes |
| XLOC_011885 | NM_007389                     | Chrmal        | chr2:73401 | 6.98   | 9.37    | 0.42 | 1.95E-003 | 1.80E-002 | yes |
| XLOC_000921 | NM_133825                     | DIERTd622e    | chr1:99540 | 3.51   | 4.71    | 0.42 | 7.20E-003 | 4.92E-002 | yes |
| XLOC_001451 | NM_030250                     | Nus1          | chr10:5213 | 3.68   | 4.94    | 0.42 | 4.50E-004 | 5.73E-003 | yes |
| XLOC_016208 | NM_030704                     | Hspb8         | chr5:11685 | 239.34 | 320.86  | 0.42 | 1.50E-004 | 2.26E-003 | yes |
| XLOC_006396 | NM_011892                     | Sgcs          | chr14:6175 | 109.21 | 146.40  | 0.42 | 1.50E-004 | 2.26E-003 | yes |
| XLOC_012746 | NM_175386                     | Lhfp          | chr3:52845 | 16.83  | 22.55   | 0.42 | 6.60E-003 | 4.59E-002 | yes |
| XLOC_005773 | NM_134080                     | Flnb          | chr14:8650 | 6.09   | 8.16    | 0.42 | 5.50E-004 | 6.64E-003 | yes |
| XLOC_010110 | NM_001164531;NM_177319        | Zfyve27       | chr19:4224 | 6.26   | 8.38    | 0.42 | 5.00E-003 | 3.74E-002 | yes |
| XLOC_006166 | NM_001110794;NM_009674        | Anxa7         | chr14:2127 | 31.39  | 42.01   | 0.42 | 6.00E-004 | 7.04E-003 | yes |
| XLOC_021448 | NM_010295                     | Gclc          | chr9:77602 | 13.49  | 18.05   | 0.42 | 6.45E-003 | 4.51E-002 | yes |
| XLOC_019819 | -                             | -             | chr7:28975 | 8.59   | 11.49   | 0.42 | 4.50E-004 | 5.73E-003 | yes |
| XLOC_009331 | NM_181414                     | Pik3c3        | chr18:3043 | 7.59   | 10.15   | 0.42 | 4.35E-003 | 3.36E-002 | yes |
| XLOC_007948 | NM_020260                     | Arhgap31      | chr16:3855 | 6.61   | 8.84    | 0.42 | 3.50E-004 | 4.67E-003 | yes |
| XLOC_016580 | NM_029742                     | Klhdc10       | chr6:30351 | 31.36  | 41.92   | 0.42 | 3.00E-004 | 4.11E-003 | yes |
| XLOC_012350 | NM_027977                     | 2310001A20Rik | chr2:15040 | 15.13  | 20.22   | 0.42 | 4.75E-003 | 3.60E-002 | yes |
| XLOC_018868 | NM_007590                     | Calm3         | chr7:17500 | 294.96 | 394.07  | 0.42 | 2.00E-004 | 2.93E-003 | yes |
| XLOC_001425 | NM_172416                     | Ostm1         | chr10:4239 | 19.24  | 25.69   | 0.42 | 9.00E-004 | 9.88E-003 | yes |
| XLOC_012817 | NM_016784                     | Plrg1         | chr3:82859 | 18.39  | 24.55   | 0.42 | 2.25E-003 | 2.01E-002 | yes |
| XLOC_004038 | NM_001164798;NM_0011647       | Slc38a10      | chr11:1199 | 14.79  | 19.74   | 0.42 | 3.00E-004 | 4.11E-003 | yes |
| XLOC_022900 | NM_026137;NR_029428           | Wdr13         | chrX:77004 | 7.57   | 10.10   | 0.42 | 5.95E-003 | 4.25E-002 | yes |
| XLOC_002046 | NM_172549                     | Cabin1        | chr10:7510 | 9.97   | 13.30   | 0.42 | 4.20E-003 | 3.28E-002 | yes |
| XLOC_021249 | NM_016808;NM_198091;NM_198091 | Usp2          | chr9:43875 | 48.28  | 64.38   | 0.42 | 6.00E-004 | 7.04E-003 | yes |
| XLOC_006751 | NM_001024716;NM_0010391       | Triobb        | chr15:7877 | 15.20  | 20.26   | 0.42 | 5.00E-004 | 6.18E-003 | yes |
| XLOC_009375 | NM_025594                     | Zmat2         | chr18:3695 | 7.64   | 10.19   | 0.41 | 3.10E-003 | 2.56E-002 | yes |
| XLOC_017216 | NM_028123                     | Slc37a3       | chr6:39284 | 4.07   | 5.43    | 0.41 | 6.30E-003 | 4.43E-002 | yes |
| XLOC_012829 | NM_001077687;NM_0010776       | Lrba          | chr3:86028 | 6.03   | 8.04    | 0.41 | 2.75E-003 | 2.32E-002 | yes |
| XLOC_020231 | NM_001122843;NM_145390        | Tnpo2         | chr8:87560 | 21.21  | 28.27   | 0.41 | 5.00E-004 | 6.18E-003 | yes |
| XLOC_017202 | NM_008098                     | Mtpn          | chr6:35458 | 6.23   | 8.30    | 0.41 | 1.80E-003 | 1.70E-002 | yes |
| XLOC_006321 | NM_013768                     | Prmt5         | chr14:5512 | 12.76  | 17.00   | 0.41 | 7.00E-004 | 8.00E-003 | yes |
| XLOC_013646 | NM_010113                     | Egf           | chr3:12938 | 11.45  | 15.25   | 0.41 | 1.10E-003 | 1.16E-002 | yes |
| XLOC_012898 | NM_011313                     | Sl00a6        | chr3:90416 | 76.82  | 102.25  | 0.41 | 5.50E-004 | 6.64E-003 | yes |
| XLOC_001871 | NM_175155                     | Sash1         | chr10:8442 | 3.78   | 5.03    | 0.41 | 1.00E-003 | 1.08E-002 | yes |
| XLOC_021258 | NM_030256                     | Bcl91         | chr9:44307 | 18.31  | 24.37   | 0.41 | 5.00E-004 | 6.18E-003 | yes |
| XLOC_010244 | NM_001243307;NM_198616        | Ccdc85b       | chr19:5447 | 14.84  | 19.74   | 0.41 | 2.50E-003 | 2.17E-002 | yes |
| XLOC_000571 | NM_178653                     | Sccpdx        | chr1:18159 | 14.53  | 19.32   | 0.41 | 1.15E-003 | 1.20E-002 | yes |
| XLOC_016026 | NM_019836                     | 2610024G14Rik | chr5:77723 | 7.27   | 9.66    | 0.41 | 6.10E-003 | 4.32E-002 | yes |
| XLOC_023132 | NM_001166453;NM_0011664       | Pls3          | chrX:73030 | 30.68  | 40.79   | 0.41 | 8.00E-004 | 8.94E-003 | yes |
| XLOC_004576 | NM_011739                     | Ywhaq         | chr12:2139 | 24.30  | 32.29   | 0.41 | 2.20E-003 | 1.98E-002 | yes |
| XLOC_021330 | NM_139001                     | Cspg4         | chr9:56712 | 2.88   | 3.82    | 0.41 | 1.85E-003 | 1.73E-002 | yes |
| XLOC_004575 | NM_009615                     | Adam17        | chr12:2132 | 6.38   | 8.47    | 0.41 | 4.25E-003 | 3.30E-002 | yes |
| XLOC_002999 | NM_001085500                  | Cisd3         | chr11:9754 | 49.60  | 65.84   | 0.41 | 1.70E-003 | 1.63E-002 | yes |
| XLOC_004025 | NM_011150                     | Lgals3bp      | chr11:1182 | 31.94  | 42.38   | 0.41 | 3.75E-003 | 2.98E-002 | yes |
| XLOC_006392 | NM_001168535;NM_0011685       | Cdadcl1       | chr14:6017 | 19.58  | 25.98   | 0.41 | 2.40E-003 | 2.10E-002 | yes |
| XLOC_002053 | NM_001161853;NM_011418        | Smarcb1       | chr10:7535 | 23.65  | 31.37   | 0.41 | 4.45E-003 | 3.40E-002 | yes |
| XLOC_006881 | NM_010271                     | Gpd1          | chr15:9954 | 836.84 | 1110.15 | 0.41 | 3.25E-003 | 2.65E-002 | yes |
| XLOC_005890 | NM_019637                     | Styx          | chr14:4597 | 8.11   | 10.76   | 0.41 | 2.00E-003 | 1.84E-002 | yes |
| XLOC_013614 | NM_025517                     | Rctcd1        | chr3:11619 | 7.96   | 10.55   | 0.41 | 1.95E-003 | 1.80E-002 | yes |
| XLOC_016927 | NM_025958                     | Cand2         | chr6:11572 | 85.67  | 113.44  | 0.40 | 4.80E-003 | 3.62E-002 | yes |
| XLOC_013872 | NM_001080384;NM_0010803       | Clta          | chr4:44025 | 50.84  | 67.31   | 0.40 | 2.00E-003 | 1.84E-002 | yes |
| XLOC_009647 | NM_001205336;NM_139206        | Arap3         | chr18:3813 | 13.29  | 17.60   | 0.40 | 1.25E-003 | 1.28E-002 | yes |
| XLOC_015114 | NM_021604                     | Agrrn         | chr4:15553 | 7.38   | 9.77    | 0.40 | 1.75E-003 | 1.66E-002 | yes |
| XLOC_002859 | NM_001163018;NM_199196        | Suz12         | chr11:7980 | 6.81   | 9.01    | 0.40 | 3.90E-003 | 3.08E-002 | yes |
| XLOC_013044 | NM_011967                     | Psmas5        | chr3:10805 | 38.51  | 50.96   | 0.40 | 1.35E-003 | 1.36E-002 | yes |
| XLOC_009510 | NM_001083967;NM_013685        | Tcf4          | chr18:6950 | 17.52  | 23.17   | 0.40 | 5.50E-004 | 6.64E-003 | yes |

gene\_exp\_diff\_significant

|             |                        |               |            |        |        |      |           |           |     |
|-------------|------------------------|---------------|------------|--------|--------|------|-----------|-----------|-----|
| XLOC_003479 | NM_026183              | Slc47a1       | chr11:6115 | 18.03  | 23.84  | 0.40 | 8.00E-004 | 8.94E-003 | yes |
| XLOC_020001 | NM_001081149           | Myst3         | chr8:23970 | 3.37   | 4.46   | 0.40 | 1.20E-003 | 1.24E-002 | yes |
| XLOC_021910 | NM_153537              | Phldb1        | chr9:44494 | 18.69  | 24.72  | 0.40 | 8.50E-004 | 9.41E-003 | yes |
| XLOC_015062 | NM_001029837;NM_001164 | Pik3cd        | chr4:14902 | 14.74  | 19.48  | 0.40 | 1.15E-003 | 1.20E-002 | yes |
| XLOC_010683 | NM_029619              | Msrb2         | chr2:19293 | 14.99  | 19.81  | 0.40 | 5.85E-003 | 4.22E-002 | yes |
| XLOC_019069 | NM_029274              | Wbp7          | chr7:31353 | 14.30  | 18.90  | 0.40 | 2.10E-003 | 1.91E-002 | yes |
| XLOC_008347 | NM_001080769           | Uhrflbpl      | chr17:2799 | 23.68  | 31.29  | 0.40 | 7.50E-004 | 8.46E-003 | yes |
| XLOC_015950 | NM_027295              | Rab28         | chr5:42016 | 19.05  | 25.17  | 0.40 | 5.00E-004 | 6.18E-003 | yes |
| XLOC_015795 | NM_009087;NM_181730    | Polr1d        | chr5:14788 | 76.97  | 101.61 | 0.40 | 8.00E-004 | 8.94E-003 | yes |
| XLOC_022823 | NM_019710              | Smcla         | chrX:14845 | 30.44  | 40.19  | 0.40 | 1.10E-003 | 1.16E-002 | yes |
| XLOC_022677 | NM_013712              | Itgblbp2      | chrX:98644 | 146.03 | 192.76 | 0.40 | 6.50E-004 | 7.51E-003 | yes |
| XLOC_007971 | NM_153412              | Phldb2        | chr16:4574 | 2.63   | 3.47   | 0.40 | 6.15E-003 | 4.35E-002 | yes |
| XLOC_010919 | NM_001110145;NM_009278 | Ssb           | chr2:69695 | 21.99  | 29.01  | 0.40 | 2.55E-003 | 2.20E-002 | yes |
| XLOC_002189 | NM_008682              | Nedd1         | chr10:9214 | 7.06   | 9.31   | 0.40 | 5.35E-003 | 3.95E-002 | yes |
| XLOC_011600 | NM_016775              | Dnajc5        | chr2:18125 | 42.68  | 56.27  | 0.40 | 4.50E-004 | 5.73E-003 | yes |
| XLOC_007284 | NM_175121              | Slc38a2       | chr15:9651 | 7.46   | 9.82   | 0.40 | 3.00E-004 | 4.11E-003 | yes |
| XLOC_014563 | NM_029572              | Erp44         | chr4:48206 | 16.82  | 22.15  | 0.40 | 7.00E-004 | 8.00E-003 | yes |
| XLOC_021935 | NM_001033324           | Zbtb16        | chr9:48459 | 32.29  | 42.48  | 0.40 | 2.00E-003 | 1.84E-002 | yes |
| XLOC_015301 | NM_011278              | Rnf4          | chr5:34679 | 12.38  | 16.29  | 0.40 | 3.55E-003 | 2.85E-002 | yes |
| XLOC_008854 | NM_001206335;NM_207217 | Itfg3         | chr17:2634 | 61.76  | 81.23  | 0.40 | 4.00E-004 | 5.20E-003 | yes |
| XLOC_016297 | NM_033561              | Eif4h         | chr5:13509 | 134.14 | 176.38 | 0.40 | 3.00E-004 | 4.11E-003 | yes |
| XLOC_009931 | NM_011842              | Mta2          | chr19:9016 | 20.60  | 27.08  | 0.39 | 1.15E-003 | 1.20E-002 | yes |
| XLOC_015768 | NM_001081109           | Lmtk2         | chr5:14486 | 11.09  | 14.58  | 0.39 | 7.00E-004 | 8.00E-003 | yes |
| XLOC_022514 | NM_001077712;NM_021465 | Stag2         | chrX:39502 | 15.15  | 19.91  | 0.39 | 4.00E-004 | 5.20E-003 | yes |
| XLOC_016384 | NM_007393              | Actb          | chr5:14366 | 173.09 | 227.32 | 0.39 | 7.50E-004 | 8.46E-003 | yes |
| XLOC_022201 | NM_008138              | Gnai2         | chr9:10751 | 109.28 | 143.44 | 0.39 | 6.00E-004 | 7.04E-003 | yes |
| XLOC_023189 | NM_008832;NM_173021    | Phka1         | chrX:99709 | 334.81 | 439.38 | 0.39 | 4.40E-003 | 3.38E-002 | yes |
| XLOC_011850 | NM_001159564;NM_021359 | Itgb6         | chr2:60436 | 13.30  | 17.44  | 0.39 | 1.35E-003 | 1.36E-002 | yes |
| XLOC_015916 | NM_178390              | Fam53a        | chr5:33943 | 80.90  | 106.09 | 0.39 | 8.50E-004 | 9.41E-003 | yes |
| XLOC_016362 | NM_197980              | Cox19         | chr5:13981 | 61.68  | 80.86  | 0.39 | 2.15E-003 | 1.95E-002 | yes |
| XLOC_011313 | NM_019771              | Dstn          | chr2:14374 | 56.74  | 74.37  | 0.39 | 9.50E-004 | 1.03E-002 | yes |
| XLOC_009190 | NM_026514              | Cdc42ep3      | chr17:7973 | 24.33  | 31.89  | 0.39 | 2.65E-003 | 2.27E-002 | yes |
| XLOC_003915 | NM_008740              | Nsf           | chr11:1036 | 14.41  | 18.88  | 0.39 | 4.15E-003 | 3.25E-002 | yes |
| XLOC_010991 | NM_001081260           | Tnks1bpl      | chr2:84890 | 24.92  | 32.64  | 0.39 | 1.95E-003 | 1.80E-002 | yes |
| XLOC_002845 | NM_201406              | Pigs          | chr11:7814 | 20.49  | 26.84  | 0.39 | 5.60E-003 | 4.09E-002 | yes |
| XLOC_006850 | NM_178789              | Tmem117       | chr15:9445 | 6.20   | 8.11   | 0.39 | 5.05E-003 | 3.77E-002 | yes |
| XLOC_017094 | NM_010656              | Sspn          | chr6:14586 | 13.77  | 18.03  | 0.39 | 6.50E-004 | 7.51E-003 | yes |
| XLOC_007560 | NM_001122683;NM_175177 | Bdhl          | chr16:3142 | 11.16  | 14.61  | 0.39 | 2.40E-003 | 2.10E-002 | yes |
| XLOC_005726 | -                      | -             | chr13:3287 | 439.83 | 575.61 | 0.39 | 1.00E-003 | 1.08E-002 | yes |
| XLOC_020755 | NM_007591              | Calr          | chr8:87365 | 161.58 | 211.46 | 0.39 | 5.00E-004 | 6.18E-003 | yes |
| XLOC_019185 | NM_010240              | Ftll1         | chr7:52713 | 355.54 | 465.20 | 0.39 | 1.00E-003 | 1.08E-002 | yes |
| XLOC_000240 | NM_008972              | Ptma          | chr1:88423 | 68.12  | 89.10  | 0.39 | 3.50E-004 | 4.67E-003 | yes |
| XLOC_000347 | NM_026390              | Ulxn4         | chr1:13014 | 19.75  | 25.83  | 0.39 | 1.30E-003 | 1.32E-002 | yes |
| XLOC_009069 | NM_020493              | Srf           | chr17:4666 | 16.21  | 21.18  | 0.39 | 1.45E-003 | 1.43E-002 | yes |
| XLOC_016432 | NM_013559              | Hspbl         | chr5:15041 | 22.32  | 29.18  | 0.39 | 1.30E-003 | 1.32E-002 | yes |
| XLOC_006676 | NM_175226              | Rnf139        | chr15:5872 | 28.42  | 37.15  | 0.39 | 2.30E-003 | 2.04E-002 | yes |
| XLOC_010044 | NM_001081319           | C030046E11Rik | chr19:2955 | 12.13  | 15.85  | 0.39 | 1.85E-003 | 1.73E-002 | yes |
| XLOC_001409 | NM_010681              | Lama4         | chr10:3866 | 13.28  | 17.34  | 0.39 | 1.35E-003 | 1.36E-002 | yes |
| XLOC_022236 | NM_001081043           | Ptpn23        | chr9:11028 | 4.72   | 6.16   | 0.39 | 3.30E-003 | 2.68E-002 | yes |
| XLOC_003234 | NR_002321;NR_002322    | Tug1          | chr11:3539 | 5.79   | 7.56   | 0.38 | 7.35E-003 | 4.98E-002 | yes |
| XLOC_015397 | NM_001083316;NM_011058 | Pdgfra        | chr5:75548 | 7.89   | 10.30  | 0.38 | 7.30E-003 | 4.96E-002 | yes |
| XLOC_000646 | NM_028173              | Tram1         | chr1:13554 | 15.24  | 19.89  | 0.38 | 3.15E-003 | 2.58E-002 | yes |
| XLOC_018270 | NM_001162939;NM_026531 | Aen           | chr7:86040 | 24.78  | 32.33  | 0.38 | 1.50E-003 | 1.47E-002 | yes |
| XLOC_002659 | NM_028360;NM_029704    | Ttcl9         | chr11:6209 | 38.75  | 50.54  | 0.38 | 9.00E-004 | 9.88E-003 | yes |
| XLOC_015339 | NM_024434              | Lap3          | chr5:45884 | 23.27  | 30.35  | 0.38 | 2.25E-003 | 2.01E-002 | yes |
| XLOC_000824 | NM_153744              | Prkag3        | chr1:74785 | 100.32 | 130.85 | 0.38 | 5.50E-004 | 6.64E-003 | yes |
| XLOC_003525 | NM_013415              | Atp1b2        | chr11:6941 | 174.00 | 226.87 | 0.38 | 1.20E-003 | 1.24E-002 | yes |
| XLOC_005800 | NM_008873              | Plau          | chr14:2165 | 30.57  | 39.85  | 0.38 | 2.15E-003 | 1.95E-002 | yes |
| XLOC_006811 | NM_016714              | Nup50         | chr15:8475 | 8.72   | 11.37  | 0.38 | 5.70E-003 | 4.14E-002 | yes |
| XLOC_006046 | NM_026174              | Entpd4        | chr14:6995 | 33.78  | 43.97  | 0.38 | 7.50E-004 | 8.46E-003 | yes |
| XLOC_001779 | NM_009870              | Cdk4          | chr10:1265 | 22.83  | 29.71  | 0.38 | 4.60E-003 | 3.50E-002 | yes |
| XLOC_000873 | NM_008801              | Pdefd         | chr1:88439 | 20.06  | 26.08  | 0.38 | 5.60E-003 | 4.09E-002 | yes |
| XLOC_007235 | NM_001033273           | 5031439G07Rik | chr15:8477 | 95.93  | 124.72 | 0.38 | 1.05E-003 | 1.12E-002 | yes |
| XLOC_002243 | NM_007636              | Cct2          | chr10:1164 | 72.24  | 93.90  | 0.38 | 8.50E-004 | 9.41E-003 | yes |
| XLOC_020111 | NM_133224              | Atp13a1       | chr8:72315 | 14.18  | 18.42  | 0.38 | 4.65E-003 | 3.53E-002 | yes |
| XLOC_013923 | NM_001035532;NM_001035 | Akap2         | chr4:57855 | 16.81  | 21.83  | 0.38 | 9.50E-004 | 1.03E-002 | yes |
| XLOC_017123 | NM_183308              | Pon2          | chr6:52146 | 21.51  | 27.91  | 0.38 | 1.70E-003 | 1.63E-002 | yes |
| XLOC_011744 | NM_139302              | Sh3glb2       | chr2:30200 | 16.00  | 20.76  | 0.38 | 6.75E-003 | 4.67E-002 | yes |
| XLOC_000746 | NM_008667              | Nabl          | chr1:52512 | 8.76   | 11.36  | 0.38 | 7.15E-003 | 4.89E-002 | yes |
| XLOC_009855 | NM_025553              | Mrpl11        | chr19:4962 | 41.70  | 54.04  | 0.37 | 2.75E-003 | 2.32E-002 | yes |
| XLOC_020735 | NM_001199593;NM_177262 | Pknl          | chr8:86190 | 50.56  | 65.51  | 0.37 | 5.95E-003 | 4.25E-002 | yes |
| XLOC_015930 | NM_001042615;NM_030127 | Htra3         | chr5:35994 | 18.31  | 23.72  | 0.37 | 1.55E-003 | 1.51E-002 | yes |
| XLOC_019658 | NM_010772              | Maz           | chr7:13416 | 38.35  | 49.67  | 0.37 | 1.75E-003 | 1.66E-002 | yes |
| XLOC_017313 | NM_025574              | Pigy          | chr6:57634 | 7.35   | 9.52   | 0.37 | 2.10E-003 | 1.91E-002 | yes |
| XLOC_012123 | NM_001111289;NM_001111 | Caprin1       | chr2:10360 | 21.85  | 28.29  | 0.37 | 6.30E-003 | 4.43E-002 | yes |
| XLOC_019653 | NM_001163774;NM_001163 | Taok2         | chr7:13400 | 36.64  | 47.43  | 0.37 | 2.50E-003 | 2.17E-002 | yes |
| XLOC_017911 | NM_207525              | Opa3          | chr7:19813 | 55.51  | 71.83  | 0.37 | 6.00E-004 | 7.04E-003 | yes |
| XLOC_010792 | NM_133673              | Tor1b         | chr2:30806 | 23.82  | 30.82  | 0.37 | 2.75E-003 | 2.32E-002 | yes |
| XLOC_003932 | NM_001032378;NM_008816 | Pecaml        | chr11:1065 | 25.67  | 33.21  | 0.37 | 1.05E-003 | 1.12E-002 | yes |
| XLOC_020903 | NM_001167910;NM_019709 | Mbtps1        | chr8:12203 | 19.10  | 24.71  | 0.37 | 2.40E-003 | 2.10E-002 | yes |
| XLOC_021251 | NM_023061              | Mcam          | chr9:43942 | 39.65  | 51.27  | 0.37 | 2.50E-003 | 2.17E-002 | yes |
| XLOC_011117 | NM_001111060;NM_007652 | Cd59a         | chr2:10393 | 17.27  | 22.32  | 0.37 | 4.40E-003 | 3.38E-002 | yes |
| XLOC_006900 | NM_026566              | 9430023L20Rik | chr15:1011 | 15.86  | 20.50  | 0.37 | 7.10E-003 | 4.86E-002 | yes |
| XLOC_010132 | NM_001037758;NM_009771 | Btrc          | chr19:4543 | 3.32   | 4.29   | 0.37 | 2.40E-003 | 2.10E-002 | yes |
| XLOC_013122 | NM_016750              | H2afz         | chr3:13752 | 74.75  | 96.45  | 0.37 | 1.20E-003 | 1.24E-002 | yes |
| XLOC_005499 | NM_00114087;NM_001114  | Pllim7        | chr13:5559 | 427.86 | 551.94 | 0.37 | 1.65E-003 | 1.59E-002 | yes |
| XLOC_010153 | NM_001163480;NM_021360 | Neur1a        | chr19:4725 | 105.00 | 135.34 | 0.37 | 5.50E-004 | 6.64E-003 | yes |
| XLOC_011391 | NM_007896              | Mapre1        | chr2:15356 | 9.01   | 11.61  | 0.37 | 1.95E-003 | 1.80E-002 | yes |
| XLOC_010148 | NM_020577              | As3mt         | chr19:4678 | 36.55  | 47.09  | 0.37 | 3.35E-003 | 2.72E-002 | yes |
| XLOC_007267 | NM_011994              | Abcd2         | chr15:9097 | 14.01  | 18.04  | 0.37 | 1.25E-003 | 1.28E-002 | yes |
| XLOC_010220 | NM_001001984           | Kdm2a         | chr19:4316 | 8.05   | 10.36  | 0.36 | 1.75E-003 | 1.66E-002 | yes |
| XLOC_000923 | NM_013626              | Pam           | chr1:99717 | 8.69   | 11.18  | 0.36 | 1.35E-003 | 1.36E-002 | yes |
| XLOC_016553 | NM_053098              | Lmod2         | chr6:24547 | 77.10  | 99.19  | 0.36 | 1.40E-003 | 1.40E-002 | yes |
| XLOC_007194 | NM_001146174;NM_011241 | Rangap1       | chr15:8155 | 12.44  | 16.00  | 0.36 | 5.15E-003 | 3.83E-002 | yes |
| XLOC_005070 | NM_007772              | Hivep1        | chr13:4214 | 4.06   | 5.22   | 0.36 | 3.60E-003 | 2.88E-002 | yes |
| XLOC_005799 | NM_027996              | 2310021P13Rik | chr14:2152 | 36.63  | 47.11  | 0.36 | 2.35E-003 | 2.08E-002 | yes |
| XLOC_015493 | NM_008861              | Pkd2          | chr5:10488 | 16.04  | 20.61  | 0.36 | 4.45E-003 | 3.40E-002 | yes |
| XLOC_008846 | NM_011822              | Pigq          | chr17:2606 | 41.34  | 53.11  | 0.36 | 3.70E-003 | 2.95E-002 | yes |
| XLOC_002306 | NM_011843              | Esy1          | chr10:1275 | 37.19  | 47.76  | 0.36 | 6.05E-003 | 4.29E-002 | yes |



gene\_exp\_diff\_significant

|             |                         |               |            |        |        |       |           |           |     |
|-------------|-------------------------|---------------|------------|--------|--------|-------|-----------|-----------|-----|
| XLOC_000202 | NM_001159883;NM_0011594 | Dnajb2        | chr1:75232 | 39.05  | 50.14  | 0.36  | 4.30E-003 | 3.34E-002 | yes |
| XLOC_021838 | NM_008408               | Stt3a         | chr9:36539 | 16.97  | 21.78  | 0.36  | 6.65E-003 | 4.61E-002 | yes |
| XLOC_017504 | NM_026376               | Plxmd1        | chr6:11590 | 13.82  | 17.75  | 0.36  | 1.15E-003 | 1.20E-002 | yes |
| XLOC_006523 | NM_001081039;NM_0011281 | Dock9         | chr14:1219 | 4.53   | 5.82   | 0.36  | 4.00E-003 | 3.15E-002 | yes |
| XLOC_015560 | NM_026718               | Ankrd13a      | chr5:11522 | 9.21   | 11.82  | 0.36  | 5.90E-003 | 4.23E-002 | yes |
| XLOC_013893 | NM_009370               | Tgfbbr1       | chr4:47366 | 8.02   | 10.28  | 0.36  | 6.60E-003 | 4.59E-002 | yes |
| XLOC_021810 | NM_001102455;NM_0011024 | Aplp2         | chr9:30942 | 185.86 | 238.37 | 0.36  | 1.40E-003 | 1.40E-002 | yes |
| XLOC_000247 | NM_001039169;NM_0010391 | Eif4e2        | chr1:89110 | 39.37  | 50.48  | 0.36  | 5.60E-003 | 4.09E-002 | yes |
| XLOC_002191 | NM_013508               | Elk3          | chr10:9271 | 14.14  | 18.12  | 0.36  | 5.00E-003 | 3.74E-002 | yes |
| XLOC_005243 | NM_173757               | Mrps27        | chr13:1001 | 45.73  | 58.61  | 0.36  | 4.10E-003 | 3.22E-002 | yes |
| XLOC_001970 | NM_175407               | Sobp          | chr10:4272 | 35.35  | 45.27  | 0.36  | 2.40E-003 | 2.10E-002 | yes |
| XLOC_007070 | NM_001033219;NM_0011681 | Slc45a4       | chr15:7341 | 12.77  | 16.35  | 0.36  | 3.80E-003 | 3.01E-002 | yes |
| XLOC_013405 | NM_134469               | Fdps          | chr3:88897 | 23.73  | 30.37  | 0.36  | 5.25E-003 | 3.89E-002 | yes |
| XLOC_015528 | NM_008146               | Golga3        | chr5:11060 | 41.59  | 53.16  | 0.35  | 1.50E-003 | 1.47E-002 | yes |
| XLOC_020462 | NM_010578               | Itgbl1        | chr8:13120 | 12.97  | 16.58  | 0.35  | 1.40E-003 | 1.40E-002 | yes |
| XLOC_001600 | NM_021565               | Midn          | chr10:7961 | 9.28   | 11.86  | 0.35  | 4.10E-003 | 3.22E-002 | yes |
| XLOC_009091 | NM_009694               | Apobec2       | chr17:4855 | 219.66 | 280.43 | 0.35  | 2.00E-003 | 1.84E-002 | yes |
| XLOC_016012 | NM_011890               | Sgcb          | chr5:74023 | 36.62  | 46.72  | 0.35  | 1.75E-003 | 1.66E-002 | yes |
| XLOC_017550 | NM_001097617;NM_144938  | Cls           | chr6:12446 | 8.96   | 11.43  | 0.35  | 7.10E-003 | 4.86E-002 | yes |
| XLOC_002417 | NM_013842               | Xbp1          | chr11:5420 | 54.81  | 69.91  | 0.35  | 2.70E-003 | 2.30E-002 | yes |
| XLOC_007285 | NM_027052               | Slc38a4       | chr15:9682 | 22.79  | 29.05  | 0.35  | 2.40E-003 | 2.10E-002 | yes |
| XLOC_008169 | NM_001103181;NM_054040  | Tulp4         | chr17:6106 | 28.68  | 36.56  | 0.35  | 2.25E-003 | 2.01E-002 | yes |
| XLOC_016283 | NM_011079               | Phkg1         | chr5:13032 | 566.46 | 721.95 | 0.35  | 7.20E-003 | 4.92E-002 | yes |
| XLOC_006897 | NM_007395               | Acvr1b        | chr15:1010 | 23.72  | 30.22  | 0.35  | 2.20E-003 | 1.98E-002 | yes |
| XLOC_010056 | NM_008960               | Pten          | chr19:3283 | 6.01   | 7.66   | 0.35  | 2.30E-003 | 2.04E-002 | yes |
| XLOC_021255 | NM_021395               | Hyou1         | chr9:44187 | 13.70  | 17.45  | 0.35  | 5.05E-003 | 3.77E-002 | yes |
| XLOC_002948 | NM_009427               | Tob1          | chr11:9407 | 23.54  | 29.98  | 0.35  | 2.30E-003 | 2.04E-002 | yes |
| XLOC_019001 | NM_001190974;NM_0011909 | Axl           | chr7:26541 | 24.48  | 31.14  | 0.35  | 2.30E-003 | 2.04E-002 | yes |
| XLOC_021522 | NM_024291               | Ky            | chr9:10240 | 173.19 | 220.22 | 0.35  | 3.20E-003 | 2.61E-002 | yes |
| XLOC_009122 | NM_011218               | Ptprs         | chr17:5655 | 4.57   | 5.81   | 0.35  | 2.55E-003 | 2.20E-002 | yes |
| XLOC_011417 | NM_178111               | Trp53inp2     | chr2:15520 | 530.82 | 674.22 | 0.35  | 6.55E-003 | 4.56E-002 | yes |
| XLOC_001005 | NM_011590               | Timm17a       | chr1:13715 | 142.30 | 180.64 | 0.34  | 1.80E-003 | 1.70E-002 | yes |
| XLOC_018381 | NM_133947               | Numal1        | chr7:10911 | 72.03  | 91.43  | 0.34  | 2.45E-003 | 2.14E-002 | yes |
| XLOC_002810 | NM_008850               | Pitpna        | chr11:7540 | 70.53  | 89.33  | 0.34  | 2.50E-003 | 2.17E-002 | yes |
| XLOC_015219 | NM_028431               | Pmpcb         | chr5:21242 | 118.84 | 150.48 | 0.34  | 1.75E-003 | 1.66E-002 | yes |
| XLOC_007436 | NM_026666               | Ubn1          | chr16:5050 | 7.00   | 8.86   | 0.34  | 4.45E-003 | 3.40E-002 | yes |
| XLOC_014252 | NM_008254               | Hmgcl1        | chr4:13550 | 56.94  | 72.05  | 0.34  | 5.75E-003 | 4.16E-002 | yes |
| XLOC_009340 | NM_001083334;NM_009668  | Bin1          | chr18:3253 | 174.50 | 220.57 | 0.34  | 5.20E-003 | 3.86E-002 | yes |
| XLOC_021390 | NM_173385               | Cilp          | chr9:65112 | 37.13  | 46.90  | 0.34  | 3.80E-003 | 3.01E-002 | yes |
| XLOC_016196 | NM_175403               | Mlec          | chr5:11559 | 48.86  | 61.70  | 0.34  | 2.50E-003 | 2.17E-002 | yes |
| XLOC_010512 | NM_016860               | Actr1a        | chr19:4645 | 43.86  | 55.35  | 0.34  | 3.90E-003 | 3.08E-002 | yes |
| XLOC_002586 | NM_173753               | Fhpl1         | chr11:5425 | 11.45  | 14.43  | 0.33  | 3.70E-003 | 2.95E-002 | yes |
| XLOC_007068 | NM_153178               | Eif2c2        | chr15:7292 | 9.40   | 11.84  | 0.33  | 2.65E-003 | 2.27E-002 | yes |
| XLOC_002221 | NM_008657               | Myf6          | chr10:1069 | 78.28  | 98.58  | 0.33  | 4.10E-003 | 3.22E-002 | yes |
| XLOC_012848 | NM_001243065            | Cct3          | chr3:88101 | 83.38  | 104.99 | 0.33  | 3.70E-003 | 2.95E-002 | yes |
| XLOC_010265 | NM_001110504;NM_007600  | Capn1         | chr19:5988 | 64.36  | 81.02  | 0.33  | 3.65E-003 | 2.92E-002 | yes |
| XLOC_004053 | NM_010756               | Mafg          | chr11:1204 | 11.23  | 14.14  | 0.33  | 6.15E-003 | 4.35E-002 | yes |
| XLOC_015946 | NM_011715               | Wdr1          | chr5:38916 | 12.30  | 15.47  | 0.33  | 4.40E-003 | 3.38E-002 | yes |
| XLOC_016132 | NM_028876               | Tmed5         | chr5:10855 | 3.05   | 3.83   | 0.33  | 4.90E-003 | 3.68E-002 | yes |
| XLOC_009163 | NM_001033340            | Lrrc30        | chr17:6796 | 100.68 | 126.44 | 0.33  | 3.15E-003 | 2.58E-002 | yes |
| XLOC_006899 | NM_010444               | Nr4a1         | chr15:1010 | 66.86  | 83.96  | 0.33  | 3.40E-003 | 2.74E-002 | yes |
| XLOC_011480 | NM_018753               | Ywhab         | chr2:16382 | 11.56  | 14.51  | 0.33  | 4.55E-003 | 3.47E-002 | yes |
| XLOC_021507 | NM_015827               | Copb2         | chr9:98464 | 58.47  | 73.37  | 0.33  | 5.30E-003 | 3.93E-002 | yes |
| XLOC_005495 | NM_025828               | Lman2         | chr13:5544 | 42.43  | 53.23  | 0.33  | 3.15E-003 | 2.58E-002 | yes |
| XLOC_019923 | NM_001113517;NM_0011135 | Arhgef7       | chr8:11728 | 68.00  | 85.31  | 0.33  | 5.60E-003 | 4.09E-002 | yes |
| XLOC_009933 | NM_026007               | Eef1g         | chr19:9041 | 432.80 | 542.94 | 0.33  | 5.40E-003 | 3.98E-002 | yes |
| XLOC_013480 | NM_019914               | Mllt11        | chr3:95022 | 28.64  | 35.92  | 0.33  | 4.35E-003 | 3.36E-002 | yes |
| XLOC_012855 | NM_001198911;NM_0011989 | Arhgef2       | chr3:88420 | 28.25  | 35.39  | 0.33  | 6.85E-003 | 4.72E-002 | yes |
| XLOC_006780 | NM_177821               | Ep300         | chr15:8141 | 9.92   | 12.42  | 0.32  | 5.10E-003 | 3.80E-002 | yes |
| XLOC_011288 | NM_011170               | Prnp          | chr2:13173 | 54.53  | 68.27  | 0.32  | 3.60E-003 | 2.88E-002 | yes |
| XLOC_009698 | NM_008306               | Ndst1         | chr18:6084 | 54.40  | 68.09  | 0.32  | 5.75E-003 | 4.16E-002 | yes |
| XLOC_020820 | NM_001013380            | Dync11l2      | chr8:10694 | 15.23  | 19.06  | 0.32  | 4.25E-003 | 3.30E-002 | yes |
| XLOC_019369 | NM_029614               | Prss23        | chr7:96656 | 16.61  | 20.77  | 0.32  | 6.05E-003 | 4.29E-002 | yes |
| XLOC_003533 | NM_009089               | Polr2a        | chr11:6954 | 10.37  | 12.96  | 0.32  | 4.45E-003 | 3.40E-002 | yes |
| XLOC_022652 | NM_010833               | Msn           | chrX:93291 | 50.67  | 63.29  | 0.32  | 5.75E-003 | 4.16E-002 | yes |
| XLOC_003026 | NM_010517               | Igfbbp4       | chr11:9890 | 69.34  | 86.54  | 0.32  | 6.30E-003 | 4.43E-002 | yes |
| XLOC_004775 | NM_026681               | Ccdc88c       | chr12:1021 | 15.63  | 19.51  | 0.32  | 6.65E-003 | 4.61E-002 | yes |
| XLOC_009284 | NM_001081963            | 9430020K01Rik | chr18:4634 | 16.89  | 21.08  | 0.32  | 6.35E-003 | 4.46E-002 | yes |
| XLOC_020433 | NM_001037877;NM_0010378 | Tcf25         | chr8:12589 | 184.17 | 229.68 | 0.32  | 6.05E-003 | 4.29E-002 | yes |
| XLOC_003221 | NM_026272               | Narf          | chr11:1210 | 64.51  | 80.38  | 0.32  | 4.10E-003 | 3.22E-002 | yes |
| XLOC_005709 | NM_010887               | Ndufs4        | chr13:1150 | 156.70 | 195.16 | 0.32  | 5.60E-003 | 4.09E-002 | yes |
| XLOC_006652 | NM_025736               | Ttc35         | chr15:4330 | 79.84  | 99.39  | 0.32  | 5.90E-003 | 4.23E-002 | yes |
| XLOC_005081 | NM_001081425            | Rbm24         | chr13:4651 | 29.75  | 37.02  | 0.32  | 6.55E-003 | 4.56E-002 | yes |
| XLOC_022188 | NM_145619               | Parp3         | chr9:10637 | 42.44  | 52.78  | 0.31  | 4.40E-003 | 3.38E-002 | yes |
| XLOC_018718 | NM_133655               | Cd81          | chr7:15021 | 139.56 | 173.37 | 0.31  | 4.85E-003 | 3.65E-002 | yes |
| XLOC_011670 | NM_146116               | Tubb2c        | chr2:25074 | 216.40 | 268.74 | 0.31  | 4.95E-003 | 3.71E-002 | yes |
| XLOC_003952 | NM_153145               | Abca8a        | chr11:1098 | 16.19  | 20.11  | 0.31  | 7.00E-003 | 4.80E-002 | yes |
| XLOC_021098 | NM_019798;NM_183408     | Pde4a         | chr9:20970 | 13.13  | 16.29  | 0.31  | 5.40E-003 | 3.98E-002 | yes |
| XLOC_002640 | NM_025757               | 4933439F18Rik | chr11:6023 | 51.80  | 64.02  | 0.31  | 5.90E-003 | 4.23E-002 | yes |
| XLOC_003856 | NM_019795               | Dnajc7        | chr11:1004 | 63.82  | 78.86  | 0.31  | 7.35E-003 | 4.98E-002 | yes |
| XLOC_004923 | NM_172585               | Larp4b        | chr13:9091 | 15.43  | 18.99  | 0.30  | 7.00E-003 | 4.80E-002 | yes |
| XLOC_018209 | NM_153057               | Nomol1        | chr7:53289 | 51.65  | 42.07  | -0.30 | 7.00E-003 | 4.80E-002 | yes |
| XLOC_003716 | NM_001042541;NM_009648  | Akap1         | chr11:8869 | 26.10  | 21.18  | -0.30 | 7.30E-003 | 4.96E-002 | yes |
| XLOC_020025 | NM_025869               | Dusp26        | chr8:32200 | 201.79 | 163.33 | -0.31 | 7.10E-003 | 4.86E-002 | yes |
| XLOC_003295 | NM_173752               | 1110067D22Rik | chr11:2072 | 20.54  | 16.62  | -0.31 | 7.35E-003 | 4.98E-002 | yes |
| XLOC_002117 | NM_021462               | Mknk2         | chr10:8012 | 371.35 | 300.14 | -0.31 | 6.70E-003 | 4.64E-002 | yes |
| XLOC_022087 | NM_001081490;NM_023605  | Fbxo9         | chr9:77929 | 78.93  | 63.51  | -0.31 | 5.85E-003 | 4.22E-002 | yes |
| XLOC_008178 | NM_011299               | Rps6ka2       | chr17:7374 | 56.23  | 45.24  | -0.31 | 6.30E-003 | 4.43E-002 | yes |
| XLOC_021966 | NM_144784               | Acat1         | chr9:53388 | 163.83 | 131.69 | -0.31 | 6.40E-003 | 4.48E-002 | yes |
| XLOC_001462 | NM_020561               | Smpd13a       | chr10:5751 | 117.32 | 94.09  | -0.32 | 5.20E-003 | 3.86E-002 | yes |
| XLOC_022202 | NM_001199217;NM_0011992 | Slc38a3       | chr9:10755 | 109.99 | 88.11  | -0.32 | 4.80E-003 | 3.62E-002 | yes |
| XLOC_015965 | NM_008904;NR_027710     | Ppargcla      | chr5:51845 | 17.57  | 14.07  | -0.32 | 5.70E-003 | 4.14E-002 | yes |
| XLOC_019706 | NM_016978               | Oat           | chr7:13974 | 256.35 | 205.13 | -0.32 | 4.45E-003 | 3.40E-002 | yes |
| XLOC_007804 | NM_001161775;NM_013607  | Myh11         | chr16:1415 | 54.80  | 43.74  | -0.33 | 4.60E-003 | 3.50E-002 | yes |
| XLOC_001825 | NM_008398               | Itga7         | chr10:1283 | 74.63  | 59.56  | -0.33 | 3.50E-003 | 2.81E-002 | yes |
| XLOC_019408 | NM_001163182;NM_0011631 | Plekhh1       | chr7:10775 | 61.85  | 49.30  | -0.33 | 5.30E-003 | 3.93E-002 | yes |
| XLOC_002725 | NM_026017               | Ctdnep1       | chr11:6978 | 238.98 | 190.39 | -0.33 | 7.30E-003 | 4.96E-002 | yes |
| XLOC_021367 | NM_028283               | Uaca          | chr9:60642 | 215.55 | 171.69 | -0.33 | 5.55E-003 | 4.08E-002 | yes |
| XLOC_005131 | NM_145975               | Ddx46         | chr13:5573 | 10.44  | 8.31   | -0.33 | 4.00E-003 | 3.15E-002 | yes |

gene\_exp\_diff\_significant

|             |                                |               |            |          |          |       |           |           |     |
|-------------|--------------------------------|---------------|------------|----------|----------|-------|-----------|-----------|-----|
| XLOC_014470 | NM_001033225                   | Pnrc1         | chr4:33332 | 70.66    | 56.22    | -0.33 | 4.35E-003 | 3.36E-002 | yes |
| XLOC_014418 | NM_172417                      | 2310042D19Rik | chr4:15559 | 312.70   | 248.01   | -0.33 | 5.60E-003 | 4.09E-002 | yes |
| XLOC_004611 | NM_013562                      | Ifrd1         | chr12:4092 | 38.15    | 30.24    | -0.34 | 7.00E-003 | 4.80E-002 | yes |
| XLOC_000473 | NM_010629                      | Kifap3        | chr1:16570 | 7.41     | 5.87     | -0.34 | 7.35E-003 | 4.98E-002 | yes |
| XLOC_010013 | NM_013467                      | Aldh1a1       | chr19:2067 | 131.71   | 104.34   | -0.34 | 2.65E-003 | 2.27E-002 | yes |
| XLOC_006688 | NM_001081409                   | Phf2011       | chr15:6640 | 14.32    | 11.34    | -0.34 | 4.40E-003 | 3.38E-002 | yes |
| XLOC_000993 | NM_054077                      | Prelp         | chr1:13580 | 48.46    | 38.27    | -0.34 | 3.70E-003 | 2.95E-002 | yes |
| XLOC_007589 | NM_001145884;NM_010580         | Itgb5         | chr16:3382 | 119.28   | 94.03    | -0.34 | 2.20E-003 | 1.98E-002 | yes |
| XLOC_001017 | NM_021605                      | Nek7          | chr1:14038 | 60.66    | 47.81    | -0.34 | 3.25E-003 | 2.65E-002 | yes |
| XLOC_016901 | NM_144799                      | Lmcd1         | chr6:11222 | 313.29   | 246.73   | -0.34 | 1.95E-003 | 1.80E-002 | yes |
| XLOC_009520 | NM_177470                      | Acaa2         | chr18:7493 | 351.58   | 276.73   | -0.35 | 2.55E-003 | 2.20E-002 | yes |
| XLOC_018700 | NM_001163689;NM_025802         | Pnpla2        | chr7:14864 | 383.64   | 301.84   | -0.35 | 2.70E-003 | 2.30E-002 | yes |
| XLOC_007757 | NM_026508                      | Trap1         | chr16:4037 | 214.61   | 168.63   | -0.35 | 1.25E-003 | 1.28E-002 | yes |
| XLOC_022042 | NM_028974                      | Kbtbd13       | chr9:65236 | 29.54    | 23.18    | -0.35 | 5.20E-003 | 3.86E-002 | yes |
| XLOC_013580 | NM_010358                      | Gstm1         | chr3:10781 | 261.80   | 205.45   | -0.35 | 2.25E-003 | 2.01E-002 | yes |
| XLOC_007049 | NM_144846                      | Fam49b        | chr15:6376 | 13.84    | 10.86    | -0.35 | 6.75E-003 | 4.67E-002 | yes |
| XLOC_018053 | NM_016772                      | Echl1         | chr7:29610 | 326.18   | 255.29   | -0.35 | 1.60E-003 | 1.55E-002 | yes |
| XLOC_005451 | NM_001199304;NM_001199         | Atxn1         | chr13:4564 | 3.80     | 2.97     | -0.35 | 1.40E-003 | 1.40E-002 | yes |
| XLOC_017389 | NM_146169                      | Paip2b        | chr6:83756 | 102.19   | 79.76    | -0.36 | 1.20E-003 | 1.24E-002 | yes |
| XLOC_020951 | NM_053207                      | Egln1         | chr8:12743 | 86.57    | 67.56    | -0.36 | 3.10E-003 | 2.56E-002 | yes |
| XLOC_019725 | NM_001045483;NM_027115         | Mapk1ip1      | chr7:14602 | 28.19    | 21.99    | -0.36 | 7.25E-003 | 4.94E-002 | yes |
| XLOC_022168 | NM_001134426;NM_001134         | Cdv3          | chr9:10325 | 119.92   | 93.47    | -0.36 | 3.40E-003 | 2.74E-002 | yes |
| XLOC_005424 | NM_001033167                   | Slc22a23      | chr13:3427 | 13.36    | 10.41    | -0.36 | 4.85E-003 | 3.65E-002 | yes |
| XLOC_003939 | NM_145823                      | Pitpnc1       | chr11:1070 | 12.35    | 9.61     | -0.36 | 1.55E-003 | 1.51E-002 | yes |
| XLOC_011762 | NM_001164357;NM_001164         | Slc25a25      | chr2:32270 | 69.27    | 53.77    | -0.37 | 5.80E-003 | 4.19E-002 | yes |
| XLOC_012426 | NM_009373                      | Tgm2          | chr2:15794 | 44.22    | 34.31    | -0.37 | 1.30E-003 | 1.32E-002 | yes |
| XLOC_005262 | NM_011056                      | Pde4d         | chr13:1094 | 62.23    | 48.22    | -0.37 | 1.55E-003 | 1.51E-002 | yes |
| XLOC_010963 | NM_080558                      | Ssfa2         | chr2:79475 | 7.99     | 6.19     | -0.37 | 4.75E-003 | 3.60E-002 | yes |
| XLOC_001360 | NM_001025392;NM_001025         | Bclaf1        | chr10:2003 | 8.75     | 6.77     | -0.37 | 2.05E-003 | 1.88E-002 | yes |
| XLOC_001868 | NM_145418                      | BC013529      | chr10:7487 | 145.89   | 112.80   | -0.37 | 9.50E-004 | 1.03E-002 | yes |
| XLOC_005272 | NM_172594                      | Dhx29         | chr13:1137 | 32.29    | 24.96    | -0.37 | 2.95E-003 | 2.45E-002 | yes |
| XLOC_015225 | NM_001161800;NM_026448         | Klhl17        | chr5:23606 | 9.82     | 7.59     | -0.37 | 1.65E-003 | 1.59E-002 | yes |
| XLOC_015892 | NM_178878                      | Hadha         | chr5:30431 | 484.93   | 374.76   | -0.37 | 2.20E-003 | 1.98E-002 | yes |
| XLOC_008096 | NM_001099738;NM_138664         | Dnajc28       | chr16:9161 | 45.13    | 34.87    | -0.37 | 2.20E-003 | 1.98E-002 | yes |
| XLOC_018350 | NM_028410                      | Prkrir        | chr7:10585 | 50.17    | 38.70    | -0.37 | 6.00E-004 | 7.04E-003 | yes |
| XLOC_005194 | NM_138953                      | E1l2          | chr13:7584 | 13.54    | 10.44    | -0.37 | 6.00E-003 | 4.27E-002 | yes |
| XLOC_004586 | NM_001161410;NM_0011614        | Ttcl5         | chr12:2937 | 21.23    | 16.37    | -0.38 | 6.50E-003 | 4.54E-002 | yes |
| XLOC_008592 | NM_001190846;NM_020005         | Kat2b         | chr17:5370 | 18.82    | 14.50    | -0.38 | 1.15E-003 | 1.20E-002 | yes |
| XLOC_006545 | -                              | -             | chr14:5151 | 24.29    | 18.71    | -0.38 | 1.20E-003 | 1.24E-002 | yes |
| XLOC_000682 | NM_011200;NR_002688            | Ptp4a1        | chr1:30997 | 50.35    | 38.76    | -0.38 | 1.20E-003 | 1.24E-002 | yes |
| XLOC_003690 | NM_177564                      | Dhrs11        | chr11:8463 | 22.26    | 17.10    | -0.38 | 3.15E-003 | 2.58E-002 | yes |
| XLOC_007036 | NM_175212                      | Tmem65        | chr15:5861 | 81.22    | 62.40    | -0.38 | 1.05E-003 | 1.12E-002 | yes |
| XLOC_019689 | NM_009943                      | Cox6a2        | chr7:13531 | 1'435.96 | 1'102.64 | -0.38 | 2.95E-003 | 2.45E-002 | yes |
| XLOC_004373 | NM_028105                      | Adck1         | chr12:8955 | 48.29    | 37.07    | -0.38 | 2.35E-003 | 2.08E-002 | yes |
| XLOC_004738 | NM_009368                      | Tgfb3         | chr12:8735 | 11.44    | 8.78     | -0.38 | 8.50E-004 | 9.41E-003 | yes |
| XLOC_008367 | NM_023734                      | Pil6          | chr17:2945 | 27.46    | 21.04    | -0.38 | 2.75E-003 | 2.32E-002 | yes |
| XLOC_021840 | NM_001029838;NM_148950         | Pknox2        | chr9:36698 | 11.32    | 8.66     | -0.39 | 1.85E-003 | 1.73E-002 | yes |
| XLOC_013487 | NM_144899                      | Adamts14      | chr3:95480 | 11.38    | 8.71     | -0.39 | 3.20E-003 | 2.61E-002 | yes |
| XLOC_011624 | NM_001110228;NM_001110         | Celf2         | chr2:64607 | 12.15    | 9.29     | -0.39 | 7.50E-004 | 8.46E-003 | yes |
| XLOC_003614 | NM_001164223;NM_026653         | Rpa1          | chr11:7511 | 96.49    | 73.75    | -0.39 | 6.00E-004 | 7.04E-003 | yes |
| XLOC_005996 | NM_027764                      | Reb1b1        | chr14:5982 | 7.74     | 5.90     | -0.39 | 4.80E-003 | 3.62E-002 | yes |
| XLOC_004724 | NM_134042                      | Aldh6a1       | chr12:8575 | 67.47    | 51.48    | -0.39 | 8.00E-004 | 8.94E-003 | yes |
| XLOC_010513 | NM_019718                      | Ar13          | chr19:4660 | 86.32    | 65.86    | -0.39 | 2.75E-003 | 2.32E-002 | yes |
| XLOC_012744 | NM_019739                      | Foxo1         | chr3:52072 | 27.74    | 21.16    | -0.39 | 2.70E-003 | 2.30E-002 | yes |
| XLOC_006874 | NM_018786                      | Prpf40b       | chr15:9912 | 36.58    | 27.89    | -0.39 | 6.50E-003 | 4.54E-002 | yes |
| XLOC_014234 | NM_001039048                   | Trim63        | chr4:13387 | 239.42   | 182.50   | -0.39 | 7.00E-004 | 8.00E-003 | yes |
| XLOC_008788 | NM_153791                      | Flywhc1       | chr17:2385 | 35.81    | 27.29    | -0.39 | 2.95E-003 | 2.45E-002 | yes |
| XLOC_007576 | NM_001110147;NM_016788         | Tnk2          | chr16:3264 | 67.04    | 51.07    | -0.39 | 3.50E-004 | 4.67E-003 | yes |
| XLOC_022145 | NM_138756                      | Slc25a36      | chr9:96975 | 4.89     | 3.73     | -0.39 | 2.25E-003 | 2.01E-002 | yes |
| XLOC_021304 | NM_175535                      | Arhgap20      | chr9:51573 | 4.94     | 3.75     | -0.39 | 1.05E-003 | 1.12E-002 | yes |
| XLOC_010459 | NM_001034962;NM_001034         | Sorbs1        | chr19:4036 | 69.26    | 52.55    | -0.40 | 5.00E-004 | 6.18E-003 | yes |
| XLOC_010482 | NM_010324                      | Got1          | chr19:4357 | 1'385.11 | 1'050.70 | -0.40 | 2.80E-003 | 2.36E-002 | yes |
| XLOC_004047 | NM_026814                      | Dysfipl       | chr11:1204 | 78.71    | 59.70    | -0.40 | 2.75E-003 | 2.32E-002 | yes |
| XLOC_017601 | NR_040265;NR_040266;NR_231000  | IH17Rik       | chr6:12918 | 60.63    | 45.98    | -0.40 | 6.05E-003 | 4.29E-002 | yes |
| XLOC_018324 | NM_181407                      | Me3           | chr7:96781 | 45.82    | 34.74    | -0.40 | 4.50E-004 | 5.73E-003 | yes |
| XLOC_023289 | NM_153319                      | Amot          | chrX:14188 | 13.68    | 10.34    | -0.40 | 3.50E-004 | 4.67E-003 | yes |
| XLOC_020756 | NM_001044744;NM_008097         | Gedh          | chr8:87396 | 42.45    | 32.10    | -0.40 | 1.45E-003 | 1.43E-002 | yes |
| XLOC_015012 | NM_001081355                   | Prdm2         | chr4:14265 | 29.29    | 22.13    | -0.40 | 4.50E-004 | 5.73E-003 | yes |
| XLOC_016391 | NM_028379                      | Zdhhc4        | chr5:14407 | 25.04    | 18.91    | -0.41 | 5.35E-003 | 3.95E-002 | yes |
| XLOC_018373 | NM_019990                      | Stard10       | chr7:10846 | 80.92    | 61.00    | -0.41 | 9.00E-004 | 9.88E-003 | yes |
| XLOC_012856 | NM_028814                      | 2810403A07Rik | chr3:88488 | 23.57    | 17.76    | -0.41 | 2.15E-003 | 1.95E-002 | yes |
| XLOC_004385 | NM_145448                      | 9030617003Rik | chr12:1020 | 18.86    | 14.20    | -0.41 | 8.50E-004 | 9.41E-003 | yes |
| XLOC_003266 | NM_026538                      | Ddx56         | chr11:6157 | 26.58    | 20.02    | -0.41 | 2.95E-003 | 2.45E-002 | yes |
| XLOC_011078 | NM_009023                      | Rapsn         | chr2:90875 | 47.93    | 36.08    | -0.41 | 2.70E-003 | 2.30E-002 | yes |
| XLOC_000362 | NM_173865                      | Slc41a1       | chr1:13372 | 60.92    | 45.77    | -0.41 | 2.50E-004 | 3.51E-003 | yes |
| XLOC_015584 | NM_145564                      | Fbxo21        | chr5:11842 | 16.62    | 12.47    | -0.41 | 6.00E-003 | 4.27E-002 | yes |
| XLOC_003036 | NM_011508                      | Eif1          | chr11:1001 | 571.82   | 428.44   | -0.42 | 4.00E-004 | 5.20E-003 | yes |
| XLOC_012308 | NM_001042671;NM_001042         | Gpcpd1        | chr2:13235 | 223.96   | 167.74   | -0.42 | 6.50E-004 | 7.51E-003 | yes |
| XLOC_000810 | NM_001005423                   | Mreg          | chr1:72205 | 16.94    | 12.68    | -0.42 | 2.00E-004 | 2.93E-003 | yes |
| XLOC_019368 | NM_028343                      | Tmem135       | chr7:96288 | 11.91    | 8.92     | -0.42 | 1.40E-003 | 1.40E-002 | yes |
| XLOC_000604 | NM_011935                      | Esrrg         | chr1:18982 | 14.04    | 10.49    | -0.42 | 7.00E-004 | 8.00E-003 | yes |
| XLOC_021469 | NM_199195                      | Bckdhd        | chr9:83842 | 16.65    | 12.43    | -0.42 | 2.50E-003 | 2.17E-002 | yes |
| XLOC_018102 | NM_145633;NM_178263            | Ankrd27       | chr7:36371 | 17.57    | 13.12    | -0.42 | 1.90E-003 | 1.77E-002 | yes |
| XLOC_014056 | NM_146150                      | Nrd1          | chr4:10867 | 81.01    | 60.43    | -0.42 | 3.45E-003 | 2.78E-002 | yes |
| XLOC_010785 | NM_001242407;NM_175392         | Fam73b        | chr2:30219 | 43.15    | 32.14    | -0.42 | 1.70E-003 | 1.63E-002 | yes |
| XLOC_020802 | NM_134141                      | Ciapiin1      | chr8:97343 | 9.13     | 6.79     | -0.43 | 3.40E-003 | 2.74E-002 | yes |
| XLOC_002153 | NM_010914                      | Nfyb          | chr10:8221 | 11.99    | 8.92     | -0.43 | 1.05E-003 | 1.12E-002 | yes |
| XLOC_003262 | NM_001174053;NM_001174         | Camk2b        | chr11:5865 | 273.75   | 203.54   | -0.43 | 5.00E-005 | 8.65E-004 | yes |
| XLOC_007058 | NM_008681                      | Ndrp1         | chr15:6676 | 41.11    | 30.56    | -0.43 | 4.00E-004 | 5.20E-003 | yes |
| XLOC_004323 | NM_001165256;NM_030246         | Dcaf4         | chr12:8486 | 40.13    | 29.82    | -0.43 | 2.05E-003 | 1.88E-002 | yes |
| XLOC_005854 | NM_001033988;NM_019744         | Ncoa4         | chr14:3297 | 28.94    | 21.49    | -0.43 | 5.00E-005 | 8.65E-004 | yes |
| XLOC_012497 | NM_015731                      | Atp9a         | chr2:16845 | 38.64    | 28.65    | -0.43 | 5.50E-004 | 6.64E-003 | yes |
| XLOC_001448 | NM_153786                      | Vgll2         | chr10:5174 | 83.58    | 61.97    | -0.43 | 6.00E-004 | 7.04E-003 | yes |
| XLOC_021422 | NM_146224                      | Zfp280d       | chr9:72122 | 12.12    | 8.98     | -0.43 | 2.40E-003 | 2.10E-002 | yes |
| XLOC_002826 | NM_139128;NM_139129;NM_0011332 | Coro6         | chr11:7727 | 247.16   | 183.06   | -0.43 | 1.60E-003 | 1.55E-002 | yes |
| XLOC_011332 | NM_001033298                   | Plk1s1        | chr2:14666 | 28.68    | 21.21    | -0.44 | 5.50E-004 | 6.64E-003 | yes |
| XLOC_015549 | NM_001010825                   | Ficd          | chr5:11416 | 3.28     | 2.43     | -0.44 | 6.30E-003 | 4.43E-002 | yes |
| XLOC_003793 | NM_145434                      | Nr1d1         | chr11:9862 | 78.83    | 58.23    | -0.44 | 1.50E-004 | 2.26E-003 | yes |
| XLOC_009458 | NM_001134697                   | Ctxn3         | chr18:5762 | 29.42    | 21.73    | -0.44 | 1.50E-003 | 1.47E-002 | yes |

gene\_exp\_diff\_significant

|             |                         |               |            |        |        |       |           |           |     |
|-------------|-------------------------|---------------|------------|--------|--------|-------|-----------|-----------|-----|
| XLOC_015325 | NM_145920               | Evc2          | chr5:37725 | 9.90   | 7.30   | -0.44 | 6.40E-003 | 4.48E-002 | yes |
| XLOC_002372 | -                       | -             | chr10:5295 | 11.28  | 8.32   | -0.44 | 2.40E-003 | 2.10E-002 | yes |
| XLOC_011177 | NM_019826               | Ivd           | chr2:11866 | 76.81  | 56.57  | -0.44 | 3.50E-004 | 4.67E-003 | yes |
| XLOC_022776 | NM_023270               | Rnf128        | chrX:13614 | 10.25  | 7.54   | -0.44 | 4.05E-003 | 3.19E-002 | yes |
| XLOC_003395 | NM_025319               | 0610009B22Rik | chr11:5149 | 35.78  | 26.31  | -0.44 | 4.25E-003 | 3.30E-002 | yes |
| XLOC_007005 | NM_175456               | Abra          | chr15:4165 | 190.10 | 139.72 | -0.44 | 4.00E-004 | 5.20E-003 | yes |
| XLOC_014721 | NM_025590               | Acot11        | chr4:10640 | 8.48   | 6.22   | -0.45 | 4.25E-003 | 3.30E-002 | yes |
| XLOC_013185 | NM_001163302;NM_001163  | Pxmp3         | chr3:55601 | 19.02  | 13.95  | -0.45 | 7.00E-004 | 8.00E-003 | yes |
| XLOC_000288 | NM_175118               | Dusp28        | chr1:94801 | 36.23  | 26.55  | -0.45 | 2.70E-003 | 2.30E-002 | yes |
| XLOC_007965 | NM_010818               | CG200         | chr16:4535 | 9.94   | 7.28   | -0.45 | 6.00E-004 | 7.04E-003 | yes |
| XLOC_001094 | NM_001025570;NM_011127  | Prrx1         | chr1:16517 | 30.37  | 22.25  | -0.45 | 5.00E-005 | 8.65E-004 | yes |
| XLOC_021479 | NM_001142943;NM_001163  | Zfp949        | chr9:88442 | 11.80  | 8.63   | -0.45 | 6.60E-003 | 4.59E-002 | yes |
| XLOC_021503 | NM_001184706;NM_001184  | Tfdp2         | chr9:96096 | 17.86  | 13.06  | -0.45 | 5.00E-005 | 8.65E-004 | yes |
| XLOC_018507 | NM_009667               | Ampd3         | chr7:11791 | 6.33   | 4.62   | -0.46 | 5.45E-003 | 4.02E-002 | yes |
| XLOC_010494 | NM_001033343            | Sec31b        | chr19:4455 | 7.11   | 5.17   | -0.46 | 1.00E-004 | 1.63E-003 | yes |
| XLOC_022862 | NM_026853               | Asb11         | chrX:16087 | 147.55 | 107.35 | -0.46 | 1.00E-004 | 1.63E-003 | yes |
| XLOC_021436 | NM_001113283;NM_153584  | BC031353      | chr9:74800 | 18.76  | 13.63  | -0.46 | 4.00E-004 | 5.20E-003 | yes |
| XLOC_005682 | NM_001024955;NM_0010774 | Pik3r1        | chr13:1024 | 9.87   | 7.16   | -0.46 | 3.50E-004 | 4.67E-003 | yes |
| XLOC_000752 | NM_133728               | Asnsd1        | chr1:53401 | 142.65 | 103.43 | -0.46 | 5.00E-005 | 8.65E-004 | yes |
| XLOC_017744 | -                       | -             | chr6:12088 | 10.32  | 7.47   | -0.47 | 6.00E-004 | 7.04E-003 | yes |
| XLOC_014020 | NM_001177980;NM_001177  | Pde4b         | chr4:10192 | 83.35  | 60.29  | -0.47 | 1.00E-004 | 1.63E-003 | yes |
| XLOC_016644 | NM_029555               | Gstk1         | chr6:42195 | 46.69  | 33.73  | -0.47 | 1.05E-003 | 1.12E-002 | yes |
| XLOC_022672 | NM_018789               | Foxo4         | chrX:98449 | 80.50  | 58.00  | -0.47 | 5.00E-005 | 8.65E-004 | yes |
| XLOC_005328 | NM_001013786            | Zfp187        | chr13:2151 | 15.59  | 11.21  | -0.48 | 1.50E-004 | 2.26E-003 | yes |
| XLOC_014302 | NM_013868               | Hspb7         | chr4:14097 | 410.02 | 294.82 | -0.48 | 5.00E-005 | 8.65E-004 | yes |
| XLOC_008348 | NM_181413               | Anks1         | chr17:2804 | 13.87  | 9.96   | -0.48 | 3.50E-004 | 4.67E-003 | yes |
| XLOC_018221 | NM_001111016;NM_175272  | Nav2          | chr7:56214 | 6.36   | 4.57   | -0.48 | 5.00E-005 | 8.65E-004 | yes |
| XLOC_013727 | -                       | -             | chr3:21973 | 9.96   | 7.15   | -0.48 | 2.90E-003 | 2.42E-002 | yes |
| XLOC_010501 | NM_013907               | Fbxw4         | chr19:4563 | 44.23  | 31.72  | -0.48 | 6.30E-003 | 4.43E-002 | yes |
| XLOC_020028 | NM_001012517;NM_134161  | Fut10         | chr8:32297 | 12.65  | 9.04   | -0.48 | 4.65E-003 | 3.53E-002 | yes |
| XLOC_009532 | NM_013666;NM_153124     | St8sia5       | chr18:7742 | 65.83  | 46.91  | -0.49 | 1.50E-004 | 2.26E-003 | yes |
| XLOC_013100 | NM_023196;NM_183423     | Pla2g12a      | chr3:12958 | 72.43  | 51.59  | -0.49 | 5.00E-005 | 8.65E-004 | yes |
| XLOC_010258 | NM_003513               | Neat1         | chr19:5842 | 813.04 | 577.85 | -0.49 | 1.50E-004 | 2.26E-003 | yes |
| XLOC_014970 | NM_026880               | Pink1         | chr4:13786 | 712.96 | 506.43 | -0.49 | 1.00E-004 | 1.63E-003 | yes |
| XLOC_006428 | NM_007940               | Ephx2         | chr14:6670 | 38.95  | 27.56  | -0.50 | 1.00E-004 | 1.63E-003 | yes |
| XLOC_014469 | NM_001034867            | Pm20d2        | chr4:33257 | 46.93  | 33.10  | -0.50 | 5.00E-005 | 8.65E-004 | yes |
| XLOC_003059 | NM_009675               | Aoc3          | chr11:1011 | 13.37  | 9.43   | -0.50 | 2.50E-004 | 3.51E-003 | yes |
| XLOC_015538 | NM_001081235            | Mnl1          | chr5:11184 | 54.29  | 38.27  | -0.50 | 5.00E-005 | 8.65E-004 | yes |
| XLOC_001225 | NM_009367               | Tgfb2         | chr1:18844 | 4.40   | 3.10   | -0.50 | 1.00E-004 | 1.63E-003 | yes |
| XLOC_014264 | NM_009523               | Wnt4          | chr4:13683 | 23.33  | 16.44  | -0.51 | 1.50E-004 | 2.26E-003 | yes |
| XLOC_003159 | NM_001005608;NM_133663  | Itgb4         | chr11:1158 | 13.37  | 9.41   | -0.51 | 1.30E-003 | 1.32E-002 | yes |
| XLOC_001290 | -                       | -             | chr1:12154 | 8.10   | 5.70   | -0.51 | 6.00E-004 | 7.04E-003 | yes |
| XLOC_015141 | -                       | -             | chr4:94831 | 10.03  | 7.04   | -0.51 | 1.85E-003 | 1.73E-002 | yes |
| XLOC_020676 | NM_001122830;NM_178771  | Klhl26        | chr8:72974 | 10.31  | 7.23   | -0.51 | 3.25E-003 | 2.65E-002 | yes |
| XLOC_017183 | NM_178625               | Tmem209       | chr6:30431 | 11.10  | 7.78   | -0.51 | 2.20E-003 | 1.98E-002 | yes |
| XLOC_021439 | NM_001081322            | Myo5c         | chr9:75075 | 9.70   | 6.79   | -0.51 | 2.00E-004 | 2.93E-003 | yes |
| XLOC_010475 | NM_018780               | Sfrp5         | chr19:4227 | 20.89  | 14.62  | -0.51 | 4.45E-003 | 3.40E-002 | yes |
| XLOC_006209 | NM_027949               | Phf7          | chr14:3205 | 3.63   | 2.54   | -0.52 | 1.75E-003 | 1.66E-002 | yes |
| XLOC_001601 | NM_007705               | Cirbp         | chr10:7963 | 10.84  | 7.59   | -0.52 | 3.00E-004 | 4.11E-003 | yes |
| XLOC_021270 | NM_022004               | Fxyd6         | chr9:45178 | 52.10  | 36.46  | -0.52 | 5.00E-005 | 8.65E-004 | yes |
| XLOC_001055 | NM_008209               | Mr1           | chr1:15697 | 18.18  | 12.72  | -0.52 | 1.00E-004 | 1.63E-003 | yes |
| XLOC_010214 | NM_134148               | Carns1        | chr19:4164 | 34.70  | 24.26  | -0.52 | 5.00E-005 | 8.65E-004 | yes |
| XLOC_003085 | NM_025988               | Acbd4         | chr11:1025 | 19.08  | 13.34  | -0.52 | 1.08E-003 | 1.08E-002 | yes |
| XLOC_019382 | NM_009381               | Thrsp         | chr7:10456 | 31.84  | 22.24  | -0.52 | 2.20E-003 | 1.98E-002 | yes |
| XLOC_014292 | NM_008812               | Pad12         | chr4:14046 | 192.48 | 134.43 | -0.52 | 5.00E-005 | 8.65E-004 | yes |
| XLOC_017338 | NM_007836               | Gadd45a       | chr6:66985 | 30.62  | 21.38  | -0.52 | 1.50E-004 | 2.26E-003 | yes |
| XLOC_014224 | NM_016693               | Map3k6        | chr4:13275 | 7.96   | 5.56   | -0.52 | 4.10E-003 | 3.22E-002 | yes |
| XLOC_020153 | NM_011977               | Slc27a1       | chr8:74092 | 82.41  | 57.51  | -0.52 | 5.00E-005 | 8.65E-004 | yes |
| XLOC_018992 | NM_001039507;NM_010719  | Lipe          | chr7:26164 | 16.86  | 11.75  | -0.52 | 9.00E-004 | 9.88E-003 | yes |
| XLOC_000442 | NM_008131               | Glul          | chr1:15574 | 46.22  | 32.18  | -0.52 | 5.00E-005 | 8.65E-004 | yes |
| XLOC_015456 | NM_181728               | Art3          | chr5:92760 | 162.36 | 112.95 | -0.52 | 5.00E-005 | 8.65E-004 | yes |
| XLOC_006947 | NM_178748               | Egflam        | chr15:7156 | 25.36  | 17.64  | -0.52 | 4.50E-004 | 5.73E-003 | yes |
| XLOC_015868 | NM_080444               | Asb10         | chr5:24038 | 131.34 | 91.24  | -0.53 | 5.00E-005 | 8.65E-004 | yes |
| XLOC_007206 | NM_001163472;NM_019823  | Cyp2d22       | chr15:8220 | 32.08  | 22.28  | -0.53 | 3.00E-004 | 4.11E-003 | yes |
| XLOC_009541 | NM_001025245;NM_001025  | Mbp           | chr18:8264 | 62.31  | 43.25  | -0.53 | 5.00E-005 | 8.65E-004 | yes |
| XLOC_013020 | NM_009196               | Slc16a1       | chr3:10444 | 15.73  | 10.92  | -0.53 | 5.00E-005 | 8.65E-004 | yes |
| XLOC_000272 | NM_001168392;NM_016894  | Ramp1         | chr1:93076 | 30.80  | 21.36  | -0.53 | 1.00E-004 | 1.63E-003 | yes |
| XLOC_020184 | NM_001083906            | Nr3c2         | chr8:79426 | 6.90   | 4.78   | -0.53 | 2.45E-003 | 2.14E-002 | yes |
| XLOC_010799 | NM_144886               | Exosc2        | chr2:31526 | 9.22   | 6.36   | -0.54 | 3.70E-003 | 2.95E-002 | yes |
| XLOC_018349 | NM_001113379            | Lrrc32        | chr7:10564 | 14.22  | 9.76   | -0.54 | 2.10E-003 | 1.91E-002 | yes |
| XLOC_002479 | NM_030093               | Snrnp25       | chr11:3210 | 42.21  | 28.84  | -0.55 | 4.00E-004 | 5.20E-003 | yes |
| XLOC_009722 | NM_001037294            | Alpk2         | chr18:6542 | 44.66  | 30.51  | -0.55 | 5.00E-005 | 8.65E-004 | yes |
| XLOC_003906 | NM_152813               | Plcd3         | chr11:1025 | 9.58   | 6.54   | -0.55 | 4.90E-003 | 3.68E-002 | yes |
| XLOC_018022 | NM_019412;NM_198048     | Prx           | chr7:28284 | 16.55  | 11.27  | -0.55 | 5.00E-004 | 6.18E-003 | yes |
| XLOC_021542 | NM_011876               | Twf2          | chr9:10610 | 230.10 | 156.61 | -0.56 | 5.00E-005 | 8.65E-004 | yes |
| XLOC_017745 | -                       | -             | chr6:12090 | 6.70   | 4.55   | -0.56 | 2.75E-003 | 2.32E-002 | yes |
| XLOC_020712 | NM_027485               | Med26         | chr8:75018 | 15.00  | 10.17  | -0.56 | 3.60E-003 | 2.88E-002 | yes |
| XLOC_006830 | NM_145478               | Pim3          | chr15:8865 | 66.02  | 44.69  | -0.56 | 5.00E-005 | 8.65E-004 | yes |
| XLOC_021555 | NM_175486               | 6430571L13Rik | chr9:10724 | 34.11  | 23.07  | -0.56 | 5.00E-005 | 8.65E-004 | yes |
| XLOC_017681 | NM_008492               | Ldhb          | chr6:14243 | 250.47 | 169.31 | -0.56 | 5.00E-005 | 8.65E-004 | yes |
| XLOC_007838 | NM_138583               | D16H22S680E   | chr16:1830 | 61.19  | 41.28  | -0.57 | 5.00E-005 | 8.65E-004 | yes |
| XLOC_004399 | NM_001177841;NM_026580  | Otub2         | chr12:1046 | 5.88   | 3.96   | -0.57 | 2.10E-003 | 1.91E-002 | yes |
| XLOC_001423 | NM_001013370;NM_001162  | Sesn1         | chr10:4153 | 8.88   | 5.97   | -0.57 | 5.00E-005 | 8.65E-004 | yes |
| XLOC_003704 | NM_025638               | Gdpd1         | chr11:8684 | 5.23   | 3.52   | -0.57 | 1.75E-003 | 1.66E-002 | yes |
| XLOC_013121 | NM_030143               | Ddit4l        | chr3:13728 | 158.82 | 106.52 | -0.58 | 5.00E-005 | 8.65E-004 | yes |
| XLOC_023215 | NM_001001176;NM_001167  | Taf9b         | chrX:10340 | 5.83   | 3.90   | -0.58 | 7.50E-004 | 8.46E-003 | yes |
| XLOC_008538 | NM_013737               | Pla2g7        | chr17:4370 | 102.65 | 68.48  | -0.58 | 5.00E-005 | 8.65E-004 | yes |
| XLOC_015553 | NM_001040691;NM_011677  | Ung           | chr5:11458 | 8.39   | 5.59   | -0.58 | 3.20E-003 | 2.61E-002 | yes |
| XLOC_017052 | NM_177687               | Crebl2        | chr6:13478 | 9.05   | 6.01   | -0.59 | 1.70E-003 | 1.63E-002 | yes |
| XLOC_019784 | NM_002452               | Nctc1         | chr7:14973 | 173.75 | 115.49 | -0.59 | 5.00E-005 | 8.65E-004 | yes |
| XLOC_016873 | NM_172730               | Cl30022K22Rik | chr6:91828 | 6.33   | 4.20   | -0.59 | 4.25E-003 | 3.30E-002 | yes |
| XLOC_002604 | NM_019440               | Irgm2         | chr11:5802 | 6.78   | 4.50   | -0.59 | 1.45E-003 | 1.43E-002 | yes |
| XLOC_011520 | NM_009883               | Cebpb         | chr2:16751 | 87.32  | 57.77  | -0.60 | 5.00E-005 | 8.65E-004 | yes |
| XLOC_014364 | NM_133753               | Errf11        | chr4:15022 | 33.38  | 21.96  | -0.60 | 5.00E-005 | 8.65E-004 | yes |
| XLOC_017839 | NM_022981               | Zfp110        | chr7:13420 | 15.40  | 10.13  | -0.60 | 1.00E-004 | 1.63E-003 | yes |
| XLOC_019275 | NM_177893               | Fanl          | chr7:71491 | 9.88   | 6.49   | -0.61 | 3.20E-003 | 2.61E-002 | yes |
| XLOC_018474 | NM_001163557;NM_008905  | Ppfbip2       | chr7:11473 | 19.19  | 12.60  | -0.61 | 5.50E-004 | 6.64E-003 | yes |
| XLOC_020925 | NM_013914               | Snai3         | chr8:12497 | 8.59   | 5.63   | -0.61 | 5.70E-003 | 4.14E-002 | yes |
| XLOC_015073 | NM_001081557;NM_001195  | Camta1        | chr4:15043 | 13.66  | 8.94   | -0.61 | 2.50E-004 | 3.51E-003 | yes |

gene\_exp\_diff\_significant

|             |                         |               |            |        |        |       |           |           |     |
|-------------|-------------------------|---------------|------------|--------|--------|-------|-----------|-----------|-----|
| XLOC_012617 | -                       | -             | chr2:91091 | 6.66   | 4.34   | -0.62 | 2.50E-004 | 3.51E-003 | yes |
| XLOC_000947 | NM_019432               | Tmem37        | chr1:1219f | 55.64  | 36.26  | -0.62 | 5.00E-005 | 8.65E-004 | yes |
| XLOC_005998 | NM_145463               | Shisa2        | chr14:6024 | 50.26  | 32.73  | -0.62 | 5.00E-005 | 8.65E-004 | yes |
| XLOC_005717 | NM_008710;NR_003544     | Nnt           | chr13:1201 | 43.00  | 28.00  | -0.62 | 5.00E-005 | 8.65E-004 | yes |
| XLOC_018199 | NM_172418               | Mamstr        | chr7:5289f | 51.71  | 33.66  | -0.62 | 2.55E-003 | 2.20E-002 | yes |
| XLOC_016682 | NM_173429               | Zfp775        | chr6:4856f | 9.65   | 6.28   | -0.62 | 1.90E-003 | 1.77E-002 | yes |
| XLOC_015329 | NM_025281               | Lyar          | chr5:3861f | 25.53  | 16.60  | -0.62 | 2.00E-004 | 2.93E-003 | yes |
| XLOC_020439 | NM_133955               | Rhou          | chr8:1261f | 22.26  | 14.47  | -0.62 | 5.00E-005 | 8.65E-004 | yes |
| XLOC_010440 | NM_013468               | Ankrd1        | chr19:361f | 25.50  | 16.54  | -0.62 | 2.50E-004 | 3.51E-003 | yes |
| XLOC_010442 | NM_016854               | Ppplr3c       | chr19:368C | 319.50 | 207.27 | -0.62 | 5.00E-005 | 8.65E-004 | yes |
| XLOC_020858 | NM_008706               | Nqol          | chr8:1099f | 14.21  | 9.18   | -0.63 | 5.00E-005 | 8.65E-004 | yes |
| XLOC_004230 | NM_029760               | Nubpl         | chr12:531f | 12.96  | 8.35   | -0.63 | 3.15E-003 | 2.58E-002 | yes |
| XLOC_007067 | NR_002864               | Pegl3         | chr15:724f | 6.29   | 4.04   | -0.64 | 1.00E-003 | 1.08E-002 | yes |
| XLOC_006195 | NM_177111               | Ccdc66        | chr14:2824 | 4.98   | 3.20   | -0.64 | 6.00E-004 | 7.04E-003 | yes |
| XLOC_005106 | NM_011817               | Gadd45g       | chr13:5194 | 136.17 | 87.39  | -0.64 | 5.00E-005 | 8.65E-004 | yes |
| XLOC_020636 | NM_001009951            | BC088983      | chr8:5901C | 8.53   | 5.47   | -0.64 | 5.40E-003 | 3.98E-002 | yes |
| XLOC_003768 | NM_198100               | Tbkbpl        | chr11:969f | 13.49  | 8.66   | -0.64 | 5.50E-004 | 6.64E-003 | yes |
| XLOC_001100 | NM_009721               | Atplb1        | chr1:1662f | 186.68 | 119.58 | -0.64 | 5.00E-005 | 8.65E-004 | yes |
| XLOC_009815 | -                       | -             | chr18:755f | 17.05  | 10.90  | -0.64 | 4.15E-003 | 3.25E-002 | yes |
| XLOC_016236 | NM_178799               | Acad12        | chr5:12204 | 26.31  | 16.82  | -0.65 | 5.00E-005 | 8.65E-004 | yes |
| XLOC_008369 | NM_008842               | Pim1          | chr17:296f | 26.19  | 16.67  | -0.65 | 5.00E-005 | 8.65E-004 | yes |
| XLOC_015361 | NM_029554               | 0610040J01Rik | chr5:6420f | 29.06  | 18.50  | -0.65 | 1.50E-004 | 2.26E-003 | yes |
| XLOC_007228 | NM_001161628;NM_001161f | Efcab6        | chr15:836f | 10.16  | 6.44   | -0.66 | 5.00E-005 | 8.65E-004 | yes |
| XLOC_007833 | NM_011172               | Prodh         | chr16:180f | 8.83   | 5.59   | -0.66 | 4.15E-003 | 3.25E-002 | yes |
| XLOC_005684 | NM_172592               | Srek1         | chr13:104f | 12.78  | 8.03   | -0.67 | 5.00E-005 | 8.65E-004 | yes |
| XLOC_020313 | NM_145604               | D230025D16Rik | chr8:10774 | 22.05  | 13.85  | -0.67 | 5.00E-005 | 8.65E-004 | yes |
| XLOC_002603 | NM_018738               | Igtp          | chr11:580f | 13.93  | 8.74   | -0.67 | 4.50E-004 | 5.73E-003 | yes |
| XLOC_001661 | NM_001013441;NM_183172  | Ric8b         | chr10:843f | 38.32  | 24.03  | -0.67 | 5.00E-005 | 8.65E-004 | yes |
| XLOC_007420 | -                       | -             | chr15:102f | 32.36  | 20.29  | -0.67 | 5.00E-005 | 8.65E-004 | yes |
| XLOC_007388 | NM_021391               | Ppplr1a       | chr15:103f | 117.11 | 73.38  | -0.67 | 5.00E-005 | 8.65E-004 | yes |
| XLOC_018346 | NM_011035               | Pak1          | chr7:1049f | 27.52  | 17.22  | -0.68 | 5.00E-005 | 8.65E-004 | yes |
| XLOC_018352 | NM_001043355;NM_001048f | Mtap6         | chr7:1064f | 13.67  | 8.55   | -0.68 | 1.10E-003 | 1.16E-002 | yes |
| XLOC_005202 | NM_001042591            | Arrdc3        | chr13:810f | 4.98   | 3.11   | -0.68 | 5.00E-005 | 8.65E-004 | yes |
| XLOC_008646 | NM_030179;NM_175378     | Clip4         | chr17:721f | 60.76  | 37.87  | -0.68 | 5.00E-005 | 8.65E-004 | yes |
| XLOC_011603 | NM_009326               | Tea2          | chr2:1814f | 7.72   | 4.79   | -0.69 | 3.90E-003 | 3.08E-002 | yes |
| XLOC_003978 | NM_178035               | Fads6         | chr11:115f | 13.92  | 8.63   | -0.69 | 4.80E-003 | 3.62E-002 | yes |
| XLOC_009115 | NM_029796               | Lrg1          | chr17:562f | 53.77  | 33.28  | -0.69 | 5.00E-005 | 8.65E-004 | yes |
| XLOC_011664 | NM_001162485;NM_178408f | Arrdc1        | chr2:2478C | 8.12   | 5.03   | -0.69 | 4.35E-003 | 3.36E-002 | yes |
| XLOC_002686 | NM_001081250            | Myh13         | chr11:6714 | 13.86  | 8.57   | -0.69 | 5.00E-005 | 8.65E-004 | yes |
| XLOC_019393 | NM_026384               | Dgat2         | chr7:1063C | 33.41  | 20.61  | -0.70 | 5.00E-005 | 8.65E-004 | yes |
| XLOC_009816 | -                       | -             | chr18:755f | 11.16  | 6.88   | -0.70 | 1.50E-004 | 2.26E-003 | yes |
| XLOC_012933 | NM_011281               | Rorc          | chr3:9417f | 94.52  | 58.15  | -0.70 | 5.00E-005 | 8.65E-004 | yes |
| XLOC_006617 | NM_001034851;NM_025459  | Fam134b       | chr15:257f | 28.46  | 17.46  | -0.70 | 5.00E-005 | 8.65E-004 | yes |
| XLOC_019286 | NM_030101               | Pgpep11       | chr7:7538f | 15.66  | 9.58   | -0.71 | 3.35E-003 | 2.72E-002 | yes |
| XLOC_004034 | NM_001198785;NM_001198f | Aatk          | chr11:119f | 9.95   | 6.08   | -0.71 | 3.50E-004 | 4.67E-003 | yes |
| XLOC_009114 | NM_001077348;NM_025874  | Plin5         | chr17:562f | 28.68  | 17.49  | -0.71 | 5.00E-005 | 8.65E-004 | yes |
| XLOC_013002 | NM_009814               | Casq2         | chr3:1018f | 62.71  | 38.10  | -0.72 | 5.00E-005 | 8.65E-004 | yes |
| XLOC_018267 | NM_001199224            | Agbl1         | chr7:83374 | 22.10  | 13.42  | -0.72 | 5.00E-005 | 8.65E-004 | yes |
| XLOC_017496 | NM_080639               | Timp4         | chr6:1150f | 63.91  | 38.51  | -0.73 | 5.00E-005 | 8.65E-004 | yes |
| XLOC_007031 | NM_001042438;NM_009572  | Zhx1          | chr15:578f | 13.40  | 8.06   | -0.73 | 5.00E-005 | 8.65E-004 | yes |
| XLOC_015484 | NM_029270;NM_146161     | Arhgap24      | chr5:1029f | 32.84  | 19.69  | -0.74 | 5.00E-005 | 8.65E-004 | yes |
| XLOC_008873 | NM_010220               | Fkbp5         | chr17:285f | 32.48  | 19.45  | -0.74 | 5.00E-005 | 8.65E-004 | yes |
| XLOC_002305 | NM_172259               | My16b         | chr10:127f | 18.92  | 11.26  | -0.75 | 4.00E-004 | 5.20E-003 | yes |
| XLOC_003622 | NM_177367               | Gemin4        | chr11:760f | 8.20   | 4.88   | -0.75 | 3.50E-004 | 4.67E-003 | yes |
| XLOC_017352 | NM_153778               | Atoh8         | chr6:7215f | 10.69  | 6.35   | -0.75 | 5.50E-004 | 6.64E-003 | yes |
| XLOC_018327 | NM_001040085;NM_001040f | Syt12         | chr7:9749f | 7.00   | 4.16   | -0.75 | 1.10E-003 | 1.16E-002 | yes |
| XLOC_002605 | NM_001040686;NM_182996  | Zfp692        | chr11:581f | 11.20  | 6.62   | -0.76 | 5.00E-005 | 8.65E-004 | yes |
| XLOC_022924 | NM_172778               | Maob          | chrX:1628f | 22.02  | 12.99  | -0.76 | 5.00E-005 | 8.65E-004 | yes |
| XLOC_005615 | NM_134071               | Ankrd32       | chr13:771f | 5.80   | 3.41   | -0.76 | 5.00E-005 | 8.65E-004 | yes |
| XLOC_006694 | NM_001166388;NM_001166f | Ptp4a3        | chr15:735f | 845.06 | 496.02 | -0.77 | 5.00E-005 | 8.65E-004 | yes |
| XLOC_018201 | NM_009800               | Car11         | chr7:5295f | 15.24  | 8.91   | -0.78 | 7.00E-004 | 8.00E-003 | yes |
| XLOC_016485 | -                       | -             | chr5:1235f | 6.67   | 3.89   | -0.78 | 2.85E-003 | 2.39E-002 | yes |
| XLOC_001315 | -                       | -             | chr1:1932f | 9.74   | 5.67   | -0.78 | 1.50E-004 | 2.26E-003 | yes |
| XLOC_004842 | NM_010588               | Jag2          | chr12:114f | 9.44   | 5.49   | -0.78 | 5.00E-005 | 8.65E-004 | yes |
| XLOC_001776 | NM_009635               | Avil          | chr10:1264 | 3.21   | 1.86   | -0.79 | 1.50E-004 | 2.26E-003 | yes |
| XLOC_006826 | NM_134096               | Fam19a5       | chr15:874f | 11.89  | 6.89   | -0.79 | 2.00E-004 | 2.93E-003 | yes |
| XLOC_018515 | NM_001243048;NM_007489  | Arnt1         | chr7:1203f | 16.79  | 9.70   | -0.79 | 5.00E-005 | 8.65E-004 | yes |
| XLOC_021754 | NM_001110309;NM_146221  | Zfp426        | chr9:2027f | 2.51   | 1.44   | -0.80 | 5.00E-005 | 8.65E-004 | yes |
| XLOC_010130 | NM_178929               | Kazald1       | chr19:451f | 24.50  | 14.06  | -0.80 | 5.00E-005 | 8.65E-004 | yes |
| XLOC_022278 | NM_011724               | Xirp1         | chr9:1199f | 90.75  | 52.01  | -0.80 | 5.00E-005 | 8.65E-004 | yes |
| XLOC_007034 | NM_177755               | Klh138        | chr15:5814 | 47.58  | 27.12  | -0.81 | 5.00E-005 | 8.65E-004 | yes |
| XLOC_017378 | NM_023547               | Ino80b        | chr6:8307f | 25.43  | 14.48  | -0.81 | 5.00E-005 | 8.65E-004 | yes |
| XLOC_011707 | NM_026212               | Agpat2        | chr2:2644f | 7.58   | 4.31   | -0.82 | 5.50E-003 | 4.05E-002 | yes |
| XLOC_017124 | NM_013743               | Pdk4          | chr6:5433f | 151.48 | 84.36  | -0.84 | 5.00E-005 | 8.65E-004 | yes |
| XLOC_018581 | NM_001146347;NM_026884f | Fam57b        | chr7:1339f | 152.34 | 84.70  | -0.85 | 5.00E-005 | 8.65E-004 | yes |
| XLOC_014579 | NM_010637               | Klf4          | chr4:5554C | 24.86  | 13.81  | -0.85 | 5.00E-005 | 8.65E-004 | yes |
| XLOC_003315 | NM_025740               | Cedc104       | chr11:291f | 8.18   | 4.53   | -0.85 | 5.50E-004 | 6.64E-003 | yes |
| XLOC_000397 | NM_053106               | Lmod1         | chr1:1372f | 15.22  | 8.43   | -0.85 | 5.00E-005 | 8.65E-004 | yes |
| XLOC_002590 | NM_001083929            | Gpx3          | chr11:547f | 202.45 | 110.76 | -0.87 | 5.00E-005 | 8.65E-004 | yes |
| XLOC_015699 | NM_001085387;NM_021611  | My110         | chr5:1371f | 25.45  | 13.82  | -0.88 | 1.50E-004 | 2.26E-003 | yes |
| XLOC_010215 | NM_178650               | Tbcd10c       | chr19:4184 | 8.29   | 4.49   | -0.89 | 3.40E-003 | 2.74E-002 | yes |
| XLOC_009653 | NM_010197               | Fgf1          | chr18:389f | 42.91  | 23.15  | -0.89 | 5.00E-005 | 8.65E-004 | yes |
| XLOC_015140 | -                       | -             | chr4:9483f | 8.53   | 4.59   | -0.89 | 5.00E-005 | 8.65E-004 | yes |
| XLOC_012351 | NM_080575               | Acss1         | chr2:15044 | 10.91  | 5.86   | -0.90 | 5.00E-005 | 8.65E-004 | yes |
| XLOC_011632 | NM_001177752;NM_001177f | Pkfbf3        | chr2:1139f | 313.13 | 167.68 | -0.90 | 5.00E-005 | 8.65E-004 | yes |
| XLOC_021009 | -                       | -             | chr8:1227f | 5.57   | 2.98   | -0.90 | 6.50E-004 | 7.51E-003 | yes |
| XLOC_004860 | -                       | -             | chr12:310f | 10.01  | 5.35   | -0.91 | 6.00E-004 | 7.04E-003 | yes |
| XLOC_006824 | NM_001205353;NM_172611  | Gramd4        | chr15:858f | 9.01   | 4.78   | -0.91 | 5.00E-005 | 8.65E-004 | yes |
| XLOC_013753 | -                       | -             | chr3:1372f | 6.93   | 3.68   | -0.92 | 5.00E-005 | 8.65E-004 | yes |
| XLOC_016239 | NM_007804               | Cux2          | chr5:1223f | 9.83   | 5.19   | -0.92 | 5.00E-005 | 8.65E-004 | yes |
| XLOC_004862 | -                       | -             | chr12:310f | 10.35  | 5.45   | -0.93 | 2.35E-003 | 2.08E-002 | yes |
| XLOC_009326 | NM_026529               | 2700062C07Rik | chr18:246f | 7.72   | 4.06   | -0.93 | 2.80E-003 | 2.36E-002 | yes |
| XLOC_008467 | NM_023124               | H2-Q8         | chr17:355f | 13.61  | 7.10   | -0.94 | 1.25E-003 | 1.28E-002 | yes |
| XLOC_014248 | NM_001085509            | Myom3         | chr4:1353f | 33.04  | 17.20  | -0.94 | 5.00E-005 | 8.65E-004 | yes |
| XLOC_007026 | NM_016667               | Sntb1         | chr15:554f | 11.42  | 5.93   | -0.95 | 5.00E-005 | 8.65E-004 | yes |
| XLOC_019768 | NM_001177576;NM_026646  | Slc25a22      | chr7:1486f | 45.75  | 23.74  | -0.95 | 5.00E-005 | 8.65E-004 | yes |
| XLOC_015559 | NM_029992               | Tchp          | chr5:1151f | 4.96   | 2.53   | -0.97 | 6.00E-004 | 7.04E-003 | yes |
| XLOC_021125 | NM_026189               | Eepd1         | chr9:2528f | 238.89 | 120.76 | -0.98 | 5.00E-005 | 8.65E-004 | yes |
| XLOC_014329 | NM_001172424;NM_011303  | Dhrs3         | chr4:1444f | 49.82  | 25.16  | -0.99 | 5.00E-005 | 8.65E-004 | yes |

gene\_exp\_diff\_significant

|             |                        |               |            |               |            |       |           |           |     |
|-------------|------------------------|---------------|------------|---------------|------------|-------|-----------|-----------|-----|
| XLOC_010745 | NM_019833              | Fam69b        | chr2:26483 | 9.74          | 4.88       | -1.00 | 4.50E-004 | 5.73E-003 | yes |
| XLOC_020788 | NM_053200              | Ces1d         | chr8:95689 | 45.55         | 22.76      | -1.00 | 5.00E-005 | 8.65E-004 | yes |
| XLOC_002638 | NM_001037764;NM_009021 | Rail          | chr11:5991 | 17.92         | 8.92       | -1.01 | 5.00E-005 | 8.65E-004 | yes |
| XLOC_016289 | NM_177047              | Auts2         | chr5:13191 | 12.24         | 6.09       | -1.01 | 5.00E-005 | 8.65E-004 | yes |
| XLOC_008364 | NM_001111099;NM_007669 | Cdkn1a        | chr17:2922 | 17.88         | 8.78       | -1.03 | 5.00E-005 | 8.65E-004 | yes |
| XLOC_017487 | NM_178373              | Cidec         | chr6:11337 | 8.46          | 4.14       | -1.03 | 5.00E-005 | 8.65E-004 | yes |
| XLOC_019586 | NM_015814              | Dkk3          | chr7:11925 | 3.79          | 1.85       | -1.04 | 5.00E-005 | 8.65E-004 | yes |
| XLOC_011113 | NM_178890              | Abtb2         | chr2:10340 | 13.44         | 6.53       | -1.04 | 5.00E-005 | 8.65E-004 | yes |
| XLOC_018054 | NM_010706;NM_010707    | Lgals4,Lgals6 | chr7:29619 | 8.30          | 4.03       | -1.04 | 5.00E-005 | 8.65E-004 | yes |
| XLOC_002682 | NM_001039545           | Myh2          | chr11:6699 | 126.90        | 61.36      | -1.05 | 5.00E-005 | 8.65E-004 | yes |
| XLOC_013579 | NM_008183              | Gstm2         | chr3:10778 | 137.75        | 66.58      | -1.05 | 5.00E-005 | 8.65E-004 | yes |
| XLOC_017969 | NM_021307              | Zfp112        | chr7:24897 | 4.74          | 2.28       | -1.06 | 5.00E-005 | 8.65E-004 | yes |
| XLOC_009251 | -                      | -             | chr17:2665 | 4.41          | 2.06       | -1.10 | 2.40E-003 | 2.10E-002 | yes |
| XLOC_003051 | NM_134028              | Tubg2         | chr11:1010 | 5.74          | 2.65       | -1.12 | 1.95E-003 | 1.80E-002 | yes |
| XLOC_007399 | -                      | -             | chr15:5814 | 5.20          | 2.39       | -1.12 | 5.00E-005 | 8.65E-004 | yes |
| XLOC_004062 | NM_007988              | Fasn          | chr11:1206 | 22.39         | 10.28      | -1.12 | 5.00E-005 | 8.65E-004 | yes |
| XLOC_012663 | NM_007606              | Car3          | chr3:14863 | 1'781.00      | 795.11     | -1.16 | 5.00E-005 | 8.65E-004 | yes |
| XLOC_011075 | NM_026161              | Clqtnf4       | chr2:90725 | 4.03          | 1.78       | -1.18 | 5.00E-005 | 8.65E-004 | yes |
| XLOC_020688 | NM_027560              | Arrdc2        | chr8:73355 | 58.15         | 25.45      | -1.19 | 5.00E-005 | 8.65E-004 | yes |
| XLOC_016248 | NM_001003953;NM_001005 | Kdm2b         | chr5:12332 | 13.19         | 5.75       | -1.20 | 5.00E-005 | 8.65E-004 | yes |
| XLOC_017979 | NM_146183              | Zfp428        | chr7:25292 | 8.70          | 3.74       | -1.22 | 5.50E-004 | 6.64E-003 | yes |
| XLOC_020182 | NM_029182              | Rasd2         | chr8:77737 | 39.59         | 17.02      | -1.22 | 5.00E-005 | 8.65E-004 | yes |
| XLOC_001010 | NM_177642              | Igfn1         | chr1:13785 | 17.32         | 7.43       | -1.22 | 5.00E-005 | 8.65E-004 | yes |
| XLOC_007476 | NM_007679              | Cebpd         | chr16:1588 | 14.40         | 6.12       | -1.23 | 5.00E-005 | 8.65E-004 | yes |
| XLOC_007000 | NM_013692              | Klf10         | chr15:3822 | 21.15         | 8.92       | -1.24 | 5.00E-005 | 8.65E-004 | yes |
| XLOC_009818 | -                      | -             | chr18:7552 | 6.90          | 2.90       | -1.25 | 8.50E-004 | 9.41E-003 | yes |
| XLOC_009408 | NM_001146299;NM_172966 | Sh3rf2        | chr18:4221 | 26.60         | 10.97      | -1.28 | 5.00E-005 | 8.65E-004 | yes |
| XLOC_006753 | NM_001161712;NM_013847 | Galr3,Gcat    | chr15:7886 | 20.78         | 8.53       | -1.28 | 5.00E-005 | 8.65E-004 | yes |
| XLOC_012972 | NM_001009935;NM_023719 | Txnip         | chr3:96355 | 914.05        | 373.34     | -1.29 | 5.00E-005 | 8.65E-004 | yes |
| XLOC_013752 | -                      | -             | chr3:13722 | 6.32          | 2.52       | -1.32 | 5.00E-005 | 8.65E-004 | yes |
| XLOC_008925 | NM_020581              | Angptl4       | chr17:3391 | 13.10         | 5.13       | -1.35 | 5.00E-005 | 8.65E-004 | yes |
| XLOC_009706 | NR_029557              | Mir145        | chr18:6180 | 51.22         | 19.83      | -1.37 | 6.70E-003 | 4.64E-002 | yes |
| XLOC_019313 | NM_173011              | Idh2          | chr7:87235 | 379.10        | 142.12     | -1.42 | 5.00E-005 | 8.65E-004 | yes |
| XLOC_005562 | NM_001195435           | 1190003K10Rik | chr13:6456 | 6.19          | 2.22       | -1.48 | 5.00E-005 | 8.65E-004 | yes |
| XLOC_002385 | -                      | -             | chr10:9519 | 107.75        | 38.02      | -1.50 | 7.00E-003 | 4.80E-002 | yes |
| XLOC_013670 | NM_177665              | Gm4861        | chr3:13721 | 5.29          | 1.80       | -1.55 | 3.15E-003 | 2.58E-002 | yes |
| XLOC_003095 | NM_010858              | My14          | chr11:1044 | 37.91         | 12.69      | -1.58 | 5.00E-005 | 8.65E-004 | yes |
| XLOC_017302 | NM_009349              | Inmt          | chr6:55120 | 31.22         | 10.24      | -1.61 | 5.00E-005 | 8.65E-004 | yes |
| XLOC_014976 | NM_001122954;NM_011110 | Pla2g5        | chr4:13835 | 12.44         | 3.61       | -1.79 | 5.00E-005 | 8.65E-004 | yes |
| XLOC_010493 | NM_009127              | Scd1          | chr19:4446 | 122.54        | 34.42      | -1.83 | 5.00E-005 | 8.65E-004 | yes |
| XLOC_011189 | NM_026929              | Chac1         | chr2:11917 | 84.09         | 20.47      | -2.04 | 5.00E-005 | 8.65E-004 | yes |
| XLOC_021134 | NM_013906              | Adamts8       | chr9:30750 | 5.99          | 1.43       | -2.06 | 5.00E-005 | 8.65E-004 | yes |
| XLOC_017390 | NM_001177713;NM_175475 | Cyp26b1       | chr6:84521 | 10.41         | 2.40       | -2.12 | 5.00E-005 | 8.65E-004 | yes |
| XLOC_016938 | NM_001166580;NM_145980 | 8430408G22Rik | chr6:11656 | 54.25         | 9.62       | -2.50 | 5.00E-005 | 8.65E-004 | yes |
| XLOC_013895 | NM_015743              | Nr4a3         | chr4:48064 | 18.67         | 3.10       | -2.59 | 5.00E-005 | 8.65E-004 | yes |
| XLOC_015233 | NM_133913;NR_030423    | Chpf2         | chr5:24092 | 75.81         | 11.18      | -2.76 | 1.85E-003 | 1.73E-002 | yes |
| XLOC_004688 | -                      | -             | chr12:7782 | 58'652'100.00 | 178'785.00 | -8.36 | 5.00E-005 | 8.65E-004 | yes |
| XLOC_016641 | -                      | -             | chr6:42027 | 44'260.10     | 0.00       | -inf  | 5.00E-005 | 8.65E-004 | yes |

**Supplementary Table 2. All upregulated predicted miR-29a targets in skeletal muscle from GHD mice after GHRT.** Shown are all predicted miR-29a targets that are conserved between mouse and human according to the Targetscan database and that are upregulated in the gene set as shown in Suppl.Table 1.

| nearest_ref_id        | gene     | FPRM   |          |                    |           |           |
|-----------------------|----------|--------|----------|--------------------|-----------|-----------|
|                       |          | GHPBS  | GHT      | log2(fold_p_value) | q_value   |           |
| NM_007743             | Col1a2   | 116.65 | 1'324.84 | 3.51               | 5.00E-005 | 8.65E-004 |
| NM_009930             | Col3a1   | 24.12  | 190.65   | 2.98               | 5.00E-005 | 8.65E-004 |
| NM_007729             | Col11a1  | 0.40   | 2.89     | 2.86               | 5.00E-005 | 8.65E-004 |
| NM_001204152;NM_00120 | C1qtnf6  | 1.87   | 13.36    | 2.84               | 5.00E-005 | 8.65E-004 |
| NM_008590             | Mest     | 1.05   | 6.27     | 2.58               | 1.50E-004 | 2.26E-003 |
| NM_009242             | Sparc    | 184.85 | 915.32   | 2.31               | 5.00E-005 | 8.65E-004 |
| NM_007737             | Col5a2   | 8.69   | 39.75    | 2.19               | 5.00E-005 | 8.65E-004 |
| NM_015734             | Col5a1   | 12.13  | 51.63    | 2.09               | 5.00E-005 | 8.65E-004 |
| NM_146007             | Col6a2   | 23.94  | 89.58    | 1.90               | 5.00E-005 | 8.65E-004 |
| NM_001243008;NM_00124 | Col6a3   | 37.65  | 135.31   | 1.85               | 5.00E-005 | 8.65E-004 |
| NM_008815             | Etv4     | 1.43   | 5.14     | 1.84               | 5.00E-005 | 8.65E-004 |
| NM_016919             | Col5a3   | 10.01  | 34.59    | 1.79               | 5.00E-005 | 8.65E-004 |
| NM_009928             | Col15a1  | 35.87  | 111.30   | 1.63               | 5.00E-005 | 8.65E-004 |
| NM_007993             | Fbn1     | 16.34  | 48.22    | 1.56               | 5.00E-005 | 8.65E-004 |
| NM_009931             | Col4a1   | 96.66  | 270.61   | 1.49               | 5.00E-005 | 8.65E-004 |
| NM_010234             | Fos      | 1.60   | 4.25     | 1.41               | 5.00E-005 | 8.65E-004 |
| NM_008970             | Pthlh    | 0.83   | 2.09     | 1.34               | 2.00E-004 | 2.93E-003 |
| NM_008047             | Fstl1    | 30.68  | 76.50    | 1.32               | 5.00E-005 | 8.65E-004 |
| NM_008695             | Nid2     | 7.14   | 17.51    | 1.29               | 5.00E-005 | 8.65E-004 |
| NM_001111043;NM_00111 | Serpinh1 | 69.01  | 151.46   | 1.13               | 5.00E-005 | 8.65E-004 |
| NM_010728             | Lox      | 1.20   | 2.54     | 1.08               | 5.00E-005 | 8.65E-004 |
| NM_026122;NM_175074   | Hmgn3    | 2.36   | 5.01     | 1.08               | 1.80E-003 | 1.70E-002 |
| NM_181395             | Pxdn     | 12.94  | 26.28    | 1.02               | 5.00E-005 | 8.65E-004 |
| NM_009932             | Col4a2   | 84.60  | 170.54   | 1.01               | 5.00E-005 | 8.65E-004 |
| NM_008610             | Mmp2     | 23.93  | 48.10    | 1.01               | 5.00E-005 | 8.65E-004 |
| NM_009616             | Adam19   | 5.97   | 11.79    | 0.98               | 5.00E-005 | 8.65E-004 |
| NM_010128             | Emp1     | 16.50  | 32.40    | 0.97               | 5.00E-005 | 8.65E-004 |
| NM_008908             | Ppic     | 13.97  | 26.89    | 0.95               | 5.00E-005 | 8.65E-004 |
| NM_027147             | Enho     | 23.60  | 44.74    | 0.92               | 5.00E-005 | 8.65E-004 |
| NM_008305             | Hspg2    | 209.32 | 394.93   | 0.92               | 5.00E-005 | 8.65E-004 |
| NM_177776             | Smtn12   | 83.95  | 156.61   | 0.90               | 5.00E-005 | 8.65E-004 |
| NM_172145             | Fam176b  | 5.78   | 10.62    | 0.88               | 1.05E-003 | 1.12E-002 |
| NM_009829             | Ccnd2    | 3.11   | 5.57     | 0.84               | 5.00E-005 | 8.65E-004 |
| NM_025455             | Ccdc28b  | 16.33  | 28.87    | 0.82               | 5.00E-005 | 8.65E-004 |
| NM_001168346;NM_02369 | Nfatc4   | 3.81   | 6.64     | 0.80               | 1.45E-003 | 1.43E-002 |
| NM_008596             | Syp12    | 183.05 | 306.67   | 0.74               | 5.00E-005 | 8.65E-004 |
| NM_010683             | Lamc1    | 19.64  | 32.81    | 0.74               | 5.00E-005 | 8.65E-004 |
| NM_011943             | Map2k6   | 11.24  | 18.64    | 0.73               | 5.00E-005 | 8.65E-004 |
| NM_029394             | Snx24    | 10.11  | 16.41    | 0.70               | 5.00E-005 | 8.65E-004 |
| NM_010937             | Nras     | 7.60   | 12.24    | 0.69               | 5.00E-005 | 8.65E-004 |
| NM_008881             | Plxna1   | 8.90   | 14.28    | 0.68               | 5.00E-005 | 8.65E-004 |
| NM_001164717;NM_00801 | Sh3pdx2a | 7.41   | 11.79    | 0.67               | 5.00E-005 | 8.65E-004 |
| NM_001008550          | Zfyve26  | 5.79   | 9.10     | 0.65               | 5.00E-005 | 8.65E-004 |
| NM_172717             | Chfr     | 6.76   | 10.58    | 0.65               | 5.00E-005 | 8.65E-004 |
| NM_010570             | Irs1     | 13.98  | 21.79    | 0.64               | 5.00E-005 | 8.65E-004 |
| NM_027174             | Col22a1  | 8.09   | 12.49    | 0.63               | 5.00E-005 | 8.65E-004 |
| NM_010415             | Hbegf    | 1.64   | 2.51     | 0.61               | 4.50E-004 | 5.73E-003 |
| NM_009730             | Atrn     | 7.51   | 11.43    | 0.61               | 5.00E-005 | 8.65E-004 |
| NM_183138             | Tet3     | 2.06   | 3.13     | 0.60               | 5.00E-005 | 8.65E-004 |
| NM_176922             | Itga11   | 5.08   | 7.66     | 0.59               | 1.80E-003 | 1.70E-002 |
| NM_008467             | Kpna4    | 32.68  | 49.22    | 0.59               | 5.00E-005 | 8.65E-004 |
| NM_011561;NM_172552   | Tdg      | 15.66  | 23.51    | 0.59               | 5.00E-005 | 8.65E-004 |
| NM_026615             | Urm1     | 18.78  | 28.11    | 0.58               | 6.50E-004 | 7.51E-003 |
| NM_172442             | Dtx4     | 2.34   | 3.49     | 0.58               | 8.00E-004 | 8.94E-003 |
| NM_001081347          | Rhobtb1  | 3.16   | 4.68     | 0.56               | 1.00E-003 | 1.08E-002 |
| NM_001145947;NM_01179 | Bace1    | 18.07  | 26.69    | 0.56               | 5.00E-005 | 8.65E-004 |
| NM_133215             | Mtmr4    | 3.52   | 5.15     | 0.55               | 1.50E-004 | 2.26E-003 |
| NM_001042485;NM_02058 | Tmem183a | 2.71   | 3.93     | 0.53               | 4.50E-004 | 5.73E-003 |
| NM_172619;NR_037707;N | Adamts10 | 2.77   | 3.99     | 0.53               | 2.10E-003 | 1.91E-002 |
| NM_173784             | Ubtd2    | 2.97   | 4.28     | 0.53               | 2.85E-003 | 2.39E-002 |
| NM_031184             | Glis2    | 6.99   | 10.00    | 0.52               | 6.85E-003 | 4.72E-002 |
| NM_001097621          | Kif26a   | 6.08   | 8.70     | 0.52               | 1.35E-003 | 1.36E-002 |
| NM_153198;NM_177993   | Hbpl     | 68.10  | 96.20    | 0.50               | 5.00E-005 | 8.65E-004 |
| NM_175136             | Rnf122   | 3.81   | 5.38     | 0.50               | 4.95E-003 | 3.71E-002 |
| NM_007523             | Bak1     | 9.27   | 13.06    | 0.49               | 1.50E-004 | 2.26E-003 |
| NM_008696             | Map4k4   | 4.65   | 6.50     | 0.48               | 1.00E-004 | 1.63E-003 |
| NM_001146268;NM_00880 | Pdgfrb   | 17.89  | 25.00    | 0.48               | 5.00E-005 | 8.65E-004 |
| NM_175414             | Tspan9   | 32.32  | 45.18    | 0.48               | 5.00E-005 | 8.65E-004 |
| NM_025509             | Ostc     | 21.07  | 29.17    | 0.47               | 8.50E-004 | 9.41E-003 |
| NM_010688             | Laasp1   | 30.73  | 42.40    | 0.46               | 2.50E-004 | 3.51E-003 |
| NM_053204;NM_178085   | Erc1     | 12.48  | 17.10    | 0.45               | 1.50E-004 | 2.26E-003 |
| NM_001163729;NM_02791 | Klhdc3   | 116.80 | 159.10   | 0.45               | 5.00E-005 | 8.65E-004 |
| NM_173867             | Rcc2     | 2.40   | 3.26     | 0.44               | 6.35E-003 | 4.46E-002 |
| NM_175171             | Mast4    | 20.28  | 27.54    | 0.44               | 2.50E-004 | 3.51E-003 |
| NM_001048206;NM_01163 | Traf3    | 11.46  | 15.50    | 0.43               | 3.50E-004 | 4.67E-003 |
| NM_001122730;NM_17824 | Tnrc18   | 6.44   | 8.68     | 0.43               | 2.50E-004 | 3.51E-003 |
| NM_009502             | Vcl      | 70.20  | 94.34    | 0.43               | 1.50E-004 | 2.26E-003 |
| NM_007590             | Calm3    | 294.96 | 394.07   | 0.42               | 2.00E-004 | 2.93E-003 |
| NM_001080769          | Uhrf1bpl | 23.68  | 31.29    | 0.40               | 7.50E-004 | 8.46E-003 |
| NM_029572             | Exp44    | 16.82  | 22.15    | 0.40               | 7.00E-004 | 8.00E-003 |
| NM_001077712;NM_02146 | Stag2    | 15.15  | 19.91    | 0.39               | 4.00E-004 | 5.20E-003 |
| NM_001122683;NM_17517 | Bdn1     | 11.16  | 14.61    | 0.39               | 2.40E-003 | 2.10E-002 |
| NM_001111289;NM_00111 | Caprin1  | 21.85  | 28.29    | 0.37               | 6.30E-003 | 4.43E-002 |
| NM_001001984          | Kdm2a    | 8.05   | 10.36    | 0.36               | 1.75E-003 | 1.66E-002 |
| NM_001039169;NM_00103 | Eif4e2   | 39.37  | 50.48    | 0.36               | 5.60E-003 | 4.09E-002 |
| NM_010578             | Itgb1    | 12.97  | 16.58    | 0.35               | 1.40E-003 | 1.40E-002 |
| NM_008960             | Pten     | 6.01   | 7.66     | 0.35               | 2.30E-003 | 2.04E-002 |
| NM_024291             | Ky       | 173.19 | 220.22   | 0.35               | 3.20E-003 | 2.61E-002 |
| NM_008850             | Pitpna   | 70.53  | 89.33    | 0.34               | 2.50E-003 | 2.17E-002 |
| NM_019914             | Mllt11   | 28.64  | 35.92    | 0.33               | 4.35E-003 | 3.36E-002 |
| NM_008306             | Ndst1    | 54.40  | 68.09    | 0.32               | 5.75E-003 | 4.16E-002 |
| NM_172585             | Larp4b   | 15.43  | 18.99    | 0.30               | 7.00E-003 | 0.0480396 |

**Supplementary Table 3.  $\geq 2$ -fold upregulated predicted miR-29a targets in skeletal muscle from GHD mice after GHRT.** Shown are all predicted miR-29a targets as shown in Suppl. Table 2 that are upregulated at least 2-fold.

| nearest_ref | gene     | FPKM   |          | log2(fold) | p_value   | q_value   |
|-------------|----------|--------|----------|------------|-----------|-----------|
|             |          | PBS    | GH       |            |           |           |
| NM_007729   | Col11a1  | 0.40   | 2.89     | 2.86       | 5.00E-005 | 8.65E-004 |
| NM_008970   | Pthlh    | 0.83   | 2.09     | 1.34       | 2.00E-004 | 2.93E-003 |
| NM_008590   | Mest     | 1.05   | 6.27     | 2.58       | 1.50E-004 | 2.26E-003 |
| NM_010728   | Lox      | 1.20   | 2.54     | 1.08       | 5.00E-005 | 8.65E-004 |
| NM_008815   | Etv4     | 1.43   | 5.14     | 1.84       | 5.00E-005 | 8.65E-004 |
| NM_010234   | Fos      | 1.60   | 4.25     | 1.41       | 5.00E-005 | 8.65E-004 |
| NM_0012041  | Clqtnf6  | 1.87   | 13.36    | 2.84       | 5.00E-005 | 8.65E-004 |
| NM_0261222  | Hmgn3    | 2.36   | 5.01     | 1.08       | 1.80E-003 | 1.70E-002 |
| NM_008695   | Nid2     | 7.14   | 17.51    | 1.29       | 5.00E-005 | 8.65E-004 |
| NM_007737   | Col15a2  | 8.69   | 39.75    | 2.19       | 5.00E-005 | 8.65E-004 |
| NM_016919   | Col15a3  | 10.01  | 34.59    | 1.79       | 5.00E-005 | 8.65E-004 |
| NM_015734   | Col15a1  | 12.13  | 51.63    | 2.09       | 5.00E-005 | 8.65E-004 |
| NM_181395   | Pxdn     | 12.94  | 26.28    | 1.02       | 5.00E-005 | 8.65E-004 |
| NM_007993   | Fbn1     | 16.34  | 48.22    | 1.56       | 5.00E-005 | 8.65E-004 |
| NM_008610   | Mmp2     | 23.93  | 48.10    | 1.01       | 5.00E-005 | 8.65E-004 |
| NM_146007   | Col16a2  | 23.94  | 89.58    | 1.90       | 5.00E-005 | 8.65E-004 |
| NM_009930   | Col13a1  | 24.12  | 190.65   | 2.98       | 5.00E-005 | 8.65E-004 |
| NM_008047   | Fstl1    | 30.68  | 76.50    | 1.32       | 5.00E-005 | 8.65E-004 |
| NM_009928   | Col115a1 | 35.87  | 111.30   | 1.63       | 5.00E-005 | 8.65E-004 |
| NM_0012430  | Col16a3  | 37.65  | 135.31   | 1.85       | 5.00E-005 | 8.65E-004 |
| NM_0011110  | Serpinh1 | 69.01  | 151.46   | 1.13       | 5.00E-005 | 8.65E-004 |
| NM_009932   | Col14a2  | 84.60  | 170.54   | 1.01       | 5.00E-005 | 8.65E-004 |
| NM_009931   | Col14a1  | 96.66  | 270.61   | 1.49       | 5.00E-005 | 8.65E-004 |
| NM_007743   | Col11a2  | 116.65 | 1'324.84 | 3.51       | 5.00E-005 | 8.65E-004 |
| NM_009242   | Sparc    | 184.85 | 915.32   | 2.31       | 5.00E-005 | 8.65E-004 |



**Supplementary Table 4. Regulation of myokines in skeletal muscle from GHD mice after GHRT.**

GHD mice were treated with PBS or GH over 3 weeks. Total RNA was isolated from the tibialis anterior muscle and analyzed using RNA deep sequencing (n=3, male mice) as described in Suppl.Table 1. Shown are the results for the transcripts of known myokines [38,41,42].

|                      | test_id                           | nearest_gene | locus      | FPKM   |        | log2(fold) | p_value   | q_value   | significance |
|----------------------|-----------------------------------|--------------|------------|--------|--------|------------|-----------|-----------|--------------|
|                      |                                   |              |            | GHPBS  | GHT    |            |           |           |              |
| <b>Il6</b>           | XLOC_01525NM_031168               | Il6          | chr5:30339 | 0.00   | 0.05   | inf        | 1.00E+000 | 1.00E+000 | no           |
| <b>Il7</b>           | XLOC_01316NM_008371               | Il7          | chr3:75720 | 0.11   | 0.13   | 0.23       | 1.00E+000 | 1.00E+000 | no           |
| <b>IL8</b>           | Cxc18, not found in RNA seq data  |              |            |        |        |            |           |           |              |
| <b>Il15</b>          | XLOC_02073NM_008357               | Il15         | chr8:84855 | 8.39   | 6.75   | -0.31      | 1.33E-001 | 3.40E-001 | no           |
| <b>Lif</b>           | XLOC_00240NM_0010395              | Lif          | chr11:4157 | 0.20   | 0.32   | 0.67       | 1.00E+000 | 1.00E+000 | no           |
| <b>Mstn</b>          | XLOC_00010NM_010834               | Mstn         | chr1:53116 | 22.01  | 19.56  | -0.17      | 1.72E-001 | 3.97E-001 | no           |
| <b>Bdnf</b>          | XLOC_01112NM_0010481              | Bdnf         | chr2:10951 | 0.20   | 0.22   | 0.15       | 1.00E+000 | 1.00E+000 | no           |
| <b>Angptl4</b>       | XLOC_00892NM_020581               | Angptl4      | chr17:3391 | 13.10  | 5.13   | -1.35      | 5.00E-005 | 8.65E-004 | yes          |
| <b>Fgf21</b>         | XLOC_01919NM_020013               | Fgf21        | chr7:52869 | 0.00   | 0.40   | inf        | 1.00E+000 | 1.00E+000 | no           |
| <b>Mcp-1</b>         | XLOC_00287NM_011333               | Ccl2         | chr11:8184 | 0.77   | 0.99   | 0.36       | 1.00E+000 | 1.00E+000 | no           |
| <b>Myonectin</b>     | Ctrp15, not found in RNA seq data |              |            |        |        |            |           |           |              |
| <b>Pai-1</b>         | XLOC_01632NM_008871               | Serpine1     | chr5:13753 | 0.83   | 1.40   | 0.75       | 1.00E+000 | 1.00E+000 | no           |
| <b>Pedf</b>          | XLOC_00361NM_011340               | Serpinf1     | chr11:7522 | 107.77 | 217.50 | 1.01       | 5.00E-005 | 8.65E-004 | yes          |
| <b>Fstl1</b>         | XLOC_00761NM_008047               | Fstl1        | chr16:3777 | 30.68  | 76.50  | 1.32       | 5.00E-005 | 8.65E-004 | yes          |
| <b>Irsin</b>         | XLOC_01416NM_027402               | Fndc5        | chr4:12881 | 43.22  | 42.51  | -0.02      | 8.32E-001 | 9.27E-001 | no           |
| <b>Vegf</b>          | XLOC_00905NM_0010252              | Vegfa        | chr17:4615 | 64.85  | 61.45  | -0.08      | 4.96E-001 | 7.25E-001 | no           |
| <b>Meteorin-like</b> | XLOC_00322NM_144797               | Metrn1       | chr11:1215 | 3.20   | 5.63   | 0.82       | 1.00E+000 | 1.00E+000 | no           |
| <b>Sparc</b>         | XLOC_00342NM_009242               | Sparc        | chr11:5520 | 184.85 | 915.32 | 2.31       | 5.00E-005 | 8.65E-004 | yes          |

**Supplementary Table 5. Regulation of Myh transcripts in skeletal muscle from GHD mice after GHRT.** GHD mice were treated with PBS or GH over 3 weeks. Total RNA was isolated from the tibialis anterior muscle and analyzed using RNA deep sequencing (n=3, male mice) as described in Suppl.Table 1. Shown are the results as FPKM for the transcripts of all Myh genes that are represented in the RNAseq data.

| test_id    | nearest_regene   | locus      | GHPBS     | GHT       | log2(fold | p_value   | q_value   | significan |
|------------|------------------|------------|-----------|-----------|-----------|-----------|-----------|------------|
| XLOC_00268 | NM_030679 Myh1   | chr11:6701 | 4'390.08  | 4'651.06  | 0.08      | 8.84E-001 | 9.48E-001 | no         |
| XLOC_00268 | NM_0010395 Myh2  | chr11:6698 | 126.90    | 61.36     | -1.05     | 5.00E-005 | 8.65E-004 | yes        |
| XLOC_00268 | NM_0010994 Myh3  | chr11:6688 | 4.46      | 2.28      | -0.97     | 1.00E+000 | 1.00E+000 | no         |
| XLOC_00268 | NM_010855 Myh4   | chr11:6705 | 36'724.80 | 36'202.40 | -0.02     | 9.89E-001 | 9.94E-001 | no         |
| XLOC_00638 | NM_0011641 Myh6  | chr14:5556 | 1.41      | 1.14      | -0.30     | 1.00E+000 | 1.00E+000 | no         |
| XLOC_00638 | NM_080728 Myh7   | chr14:5556 | 2.07      | 6.26      | 1.59      | 5.00E-005 | 8.65E-004 | yes        |
| XLOC_01141 | NM_0010853 Myh7b | chr2:15543 | 11.34     | 7.01      | -0.69     | 2.42E-001 | 4.85E-001 | no         |
| XLOC_00268 | NM_177369 Myh8   | chr11:6705 | 2.41      | 3.59      | 0.58      | 1.20E-003 | 1.24E-002 | yes        |
| XLOC_00714 | NM_022410 Myh9   | chr15:7759 | 66.92     | 82.04     | 0.29      | 9.20E-003 | 5.84E-002 | no         |
| XLOC_00268 | NM_175260 Myh10  | chr11:6850 | 6.30      | 7.28      | 0.21      | 1.12E-001 | 3.05E-001 | no         |
| XLOC_00780 | NM_0011617 Myh11 | chr16:1419 | 54.80     | 43.74     | -0.33     | 4.60E-003 | 3.50E-002 | yes        |
| XLOC_00268 | NM_0010812 Myh13 | chr11:6714 | 13.86     | 8.57      | -0.69     | 5.00E-005 | 8.65E-004 | yes        |
| XLOC_01919 | NM_028021 Myh14  | chr7:51861 | 53.67     | 49.37     | -0.12     | 2.98E-001 | 5.45E-001 | no         |
| XLOC_00765 | NM_0011662 Myh15 | chr16:4905 | 0.03      | 0.02      | -0.84     | 1.00E+000 | 1.00E+000 | no         |

**Supplementary Table 6. Primer sequences used.**

**Mouse Primers**

|            |                          |
|------------|--------------------------|
| mPten-F    | TCGTTAGCAGAAACAAAAGGA    |
| mPten-Re   | TCTGCAGGAAATCCCATAGC     |
| mCol3a1-F  | GGAACCTGGTTTCTCTCACC     |
| mCol3a1-Re | TAGGACTGACCAAGGTGGCT     |
| mFstl1-F   | GAGCACGATGTGAAACGA       |
| mFstl1-Re  | CGCAGATCTTGGATTTGCTT     |
| mCol6a3-F  | GCCAGCACACCGAGCATCCAGTTC |
| mCol6a3-Re | AGTGCCATAGTAACTGAAGTC    |
| mSerpH1-F  | GCCGAGGTGAAGAAACCCC      |
| mSerpH1-Re | CATCGCCTGATATAGGCTGAAG   |
| mSparc-F   | TTCAGACCGCCAGAACTCTT     |
| mSparc-Re  | CCAGGCAAAGGAGAAAGAAG     |
| m18S-F     | GACACGGACAGGATTGACAGATTG |
| m18S-Re    | AAATCGCTCCACCAACTAAGAACG |

**Human Primers**

|                |                         |
|----------------|-------------------------|
| HU_PTEN-F      | TGAAGGCGTATACAGGAACAAT  |
| HU_PTEN-Re     | CGGTGTCATAATGTCTTTTCAGC |
| HU_COL3A1-F    | AGGGGAGCTGGCTACTTCTC    |
| HU_COL3A1-Re   | AGGACTGACCAAGATGGGAA    |
| HU_FSTL1-F     | CCAGACCACGATGTGAAAC     |
| HU_FSTL1-Re    | GGCACAGATCTTGGATTTGCT   |
| HU_COL6A3-F    | TAATTGAATCGAGGAGCCCA    |
| HU_COL6A3-Re   | AAGTGCCGATGTTTCTCAT     |
| HU_SERPINH1-F  | AGAGTAGAATCGTGTGCGCG    |
| HU_SERPINH1-Re | CATGGCCAGGAAGTGGTTT     |
| HU_SPARC-F     | CTTCAGACTGCCCGGAGA      |
| HU_SPARC-Re    | GAAAGAAGATCCAGGCCCTC    |
| HU_18S-F       | GTAACCCGTTGAACCCATT     |
| HU_18S-Re      | CCATCCAATCGGTAGTAGCG    |
